# Supplementary material for: How well are aerosol–cloud interactions represented in climate models? – Part 1: Understanding the sulfate aerosol production from the 2014–15 Holuhraun eruption
Source: Copernicus journal article supplement (doi:10.5194/acp-24-1939-2024), 2024-02-13
Supplement: Supplementary file 17 [file acp-24-1939-2024-supplement.zip]

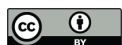

## *Supplement of*

# **How well are aerosol–cloud interactions represented in climate models? – Part 1: Understanding the sulfate aerosol production from the 2014–15 Holuhraun eruption**

**George Jordan et al.**

*Correspondence to:* George Jordan ([george.jordan@metoffice.gov.uk](mailto:george.jordan@metoffice.gov.uk))

- [acp-24-1939-2024-supplement-title-page.pdf](#)
- [Fig-S01.png](#)
- [Fig-S02.gif](#)
- [Fig-S03.pdf](#)
- [Fig-S04.pdf](#)
- [Fig-S05.pdf](#)
- [Fig-S06.pdf](#)
- [Fig-S07.pdf](#)
- [Fig-S08.pdf](#)
- [Fig-S09.pdf](#)
- [Fig-S10.pdf](#)
- [Fig-S11.pdf](#)
- [Fig-S12.pdf](#)
- [Fig-S13.pdf](#)
- [Fig-S14.pdf](#)
- [Fig-S15.pdf](#)
- [Fig-S16.pdf](#)
- [Fig-S17.pdf](#)
- [Fig-S18.pdf](#)

- [Fig-S19.pdf](#)
- [Fig-S20.pdf](#)
- [Fig-S21.pdf](#)
- [Fig-S22.pdf](#)
- [Fig-S23.pdf](#)
- [Fig-S24.pdf](#)
- [Fig-S25.pdf](#)
- [Fig-S26.pdf](#)
- [Fig-S27.pdf](#)
- [Fig-S28.pdf](#)

The copyright of individual parts of the supplement might differ from the article licence.
