# Supplementary material for: How well are aerosol–cloud interactions represented in climate models? – Part 1: Understanding the sulfate aerosol production from the 2014–15 Holuhraun eruption
Source: Copernicus journal article supplement (doi:10.5194/acp-24-1939-2024), 2024-02-13
Supplement: Supplementary file 23 [file acp-24-1939-2024-supplement.zip]

# Valentia-observatory

Key: (Mean, 90<sup>th</sup> pct., Months in clim.)

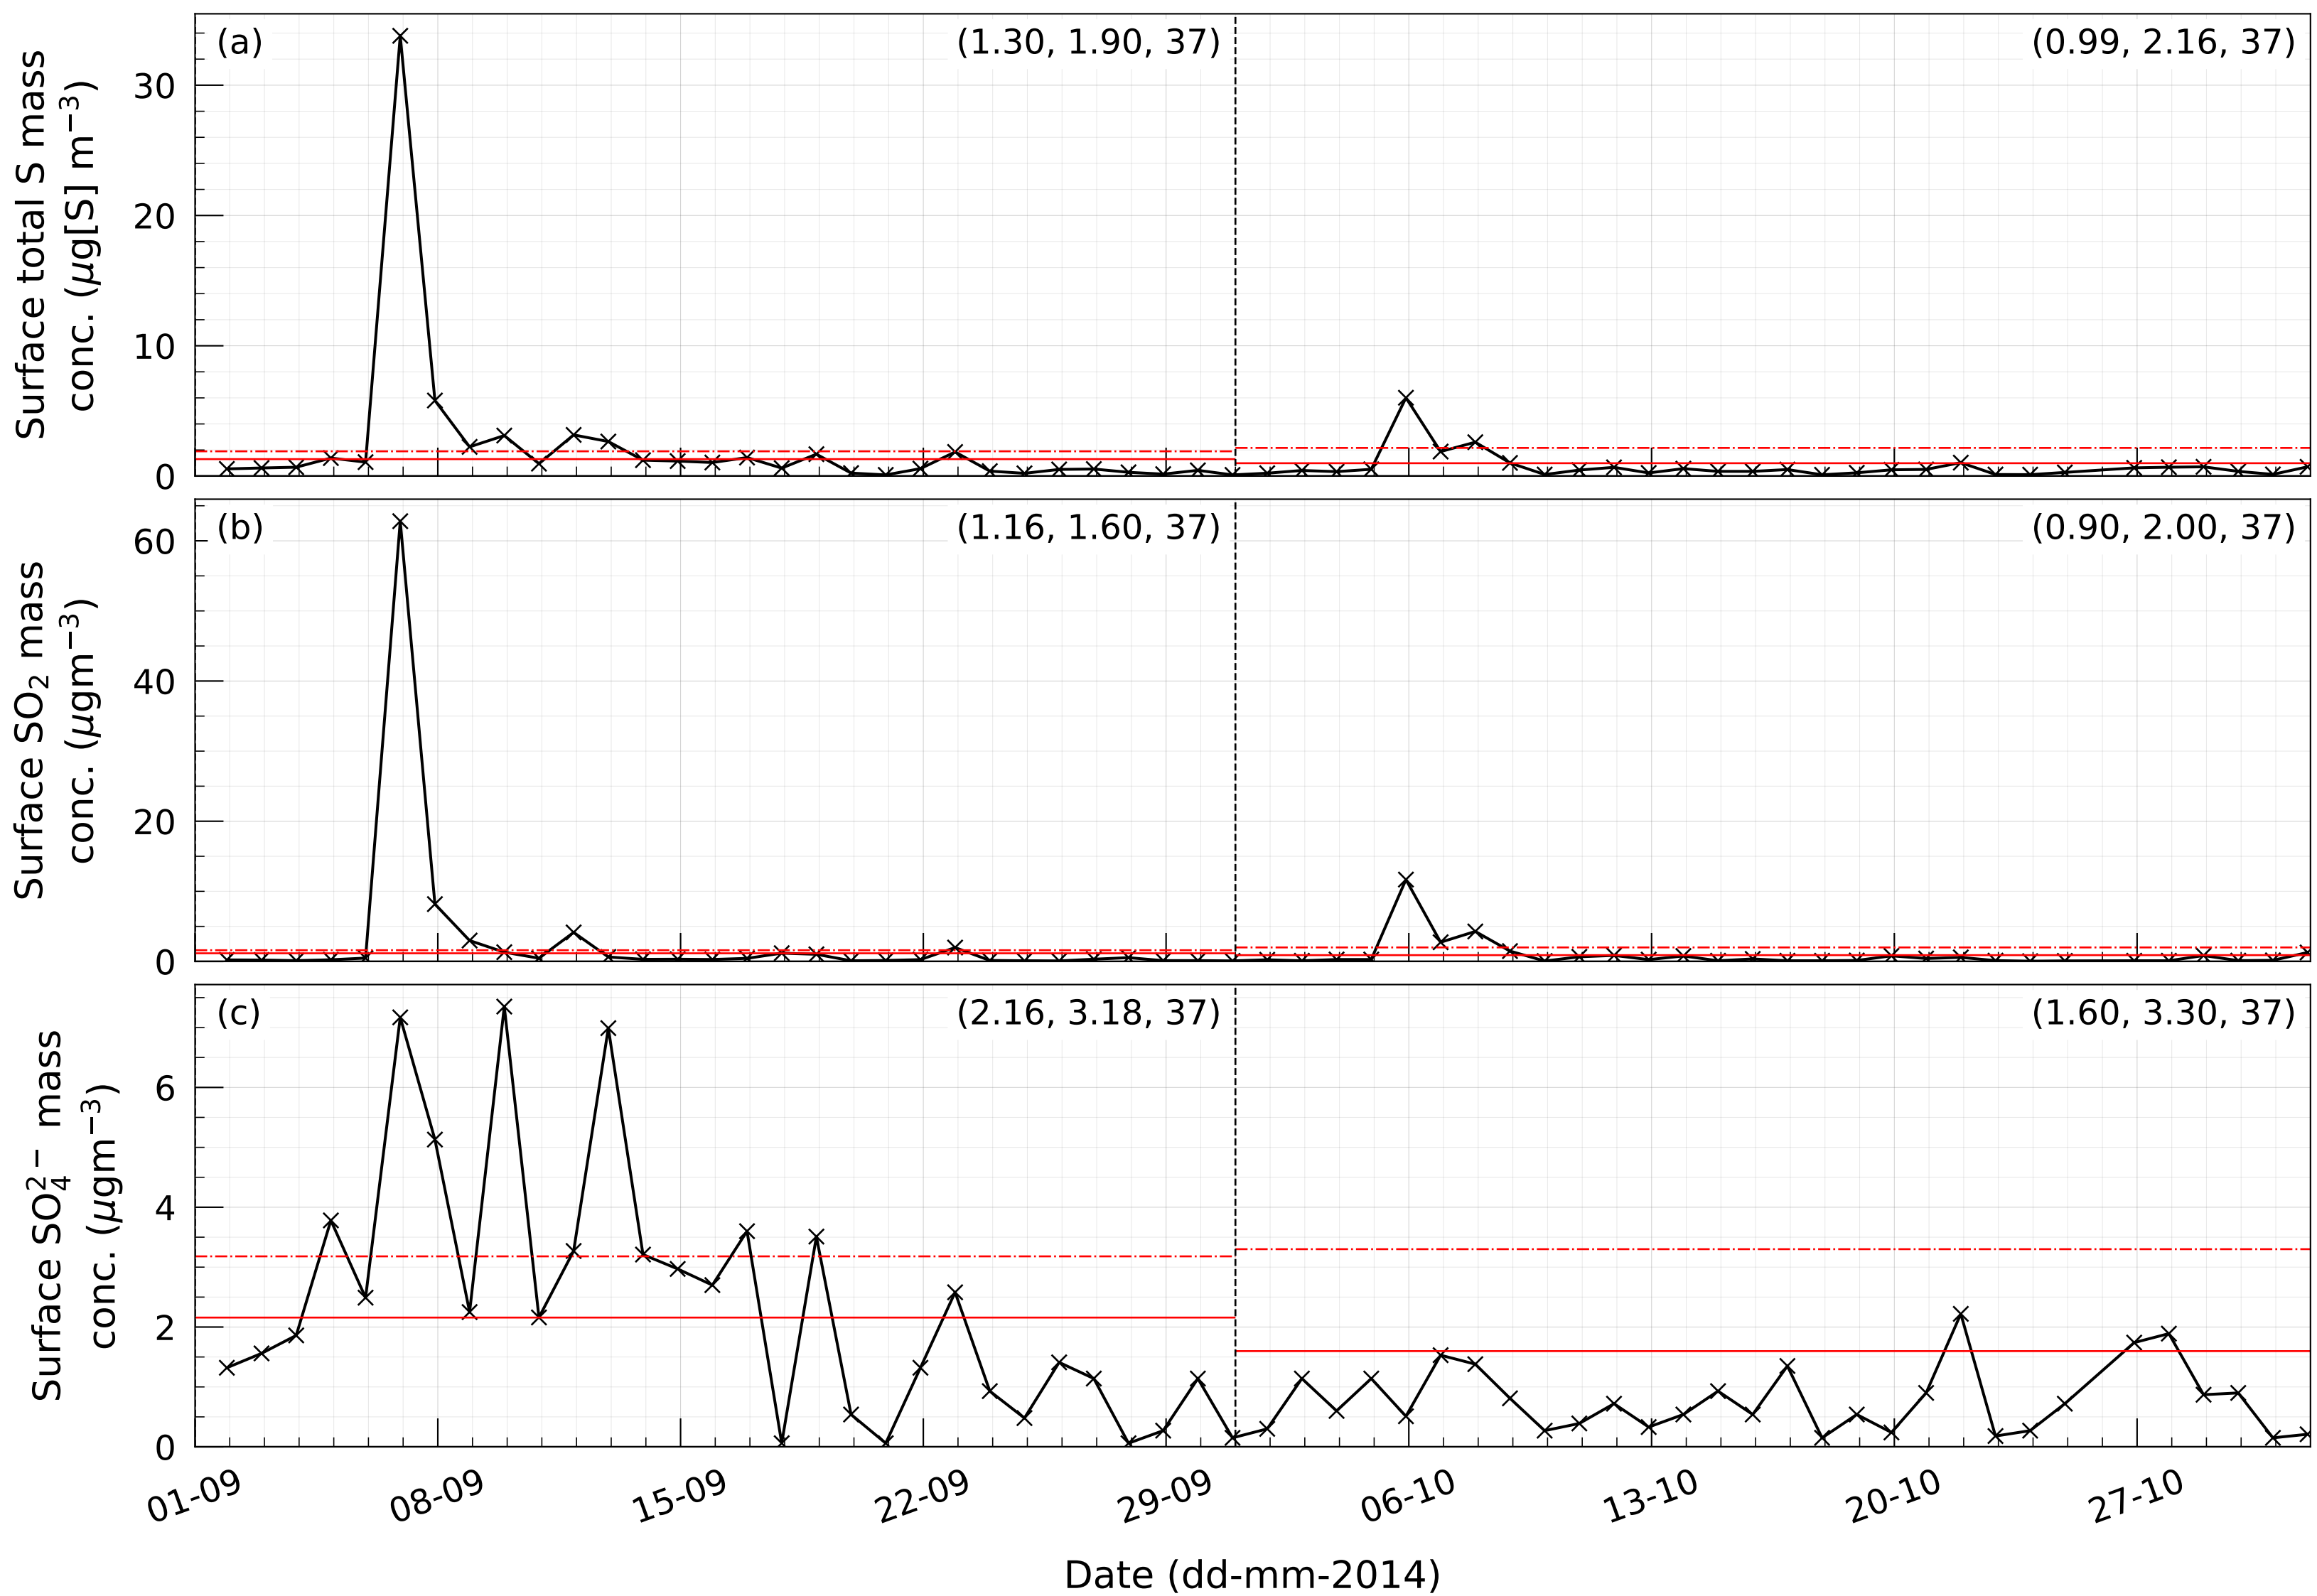

—x— Observations — Mean - - - 90<sup>th</sup> percentile
