# Supplementary figures and images for: How well are aerosol–cloud interactions represented in climate models? – Part 1: Understanding the sulfate aerosol production from the 2014–15 Holuhraun eruption
Source: Copernicus journal article supplement (doi:10.5194/acp-24-1939-2024), 2024-02-13

# Risoe

Key: (Mean, 90<sup>th</sup> pct., Months in clim.)

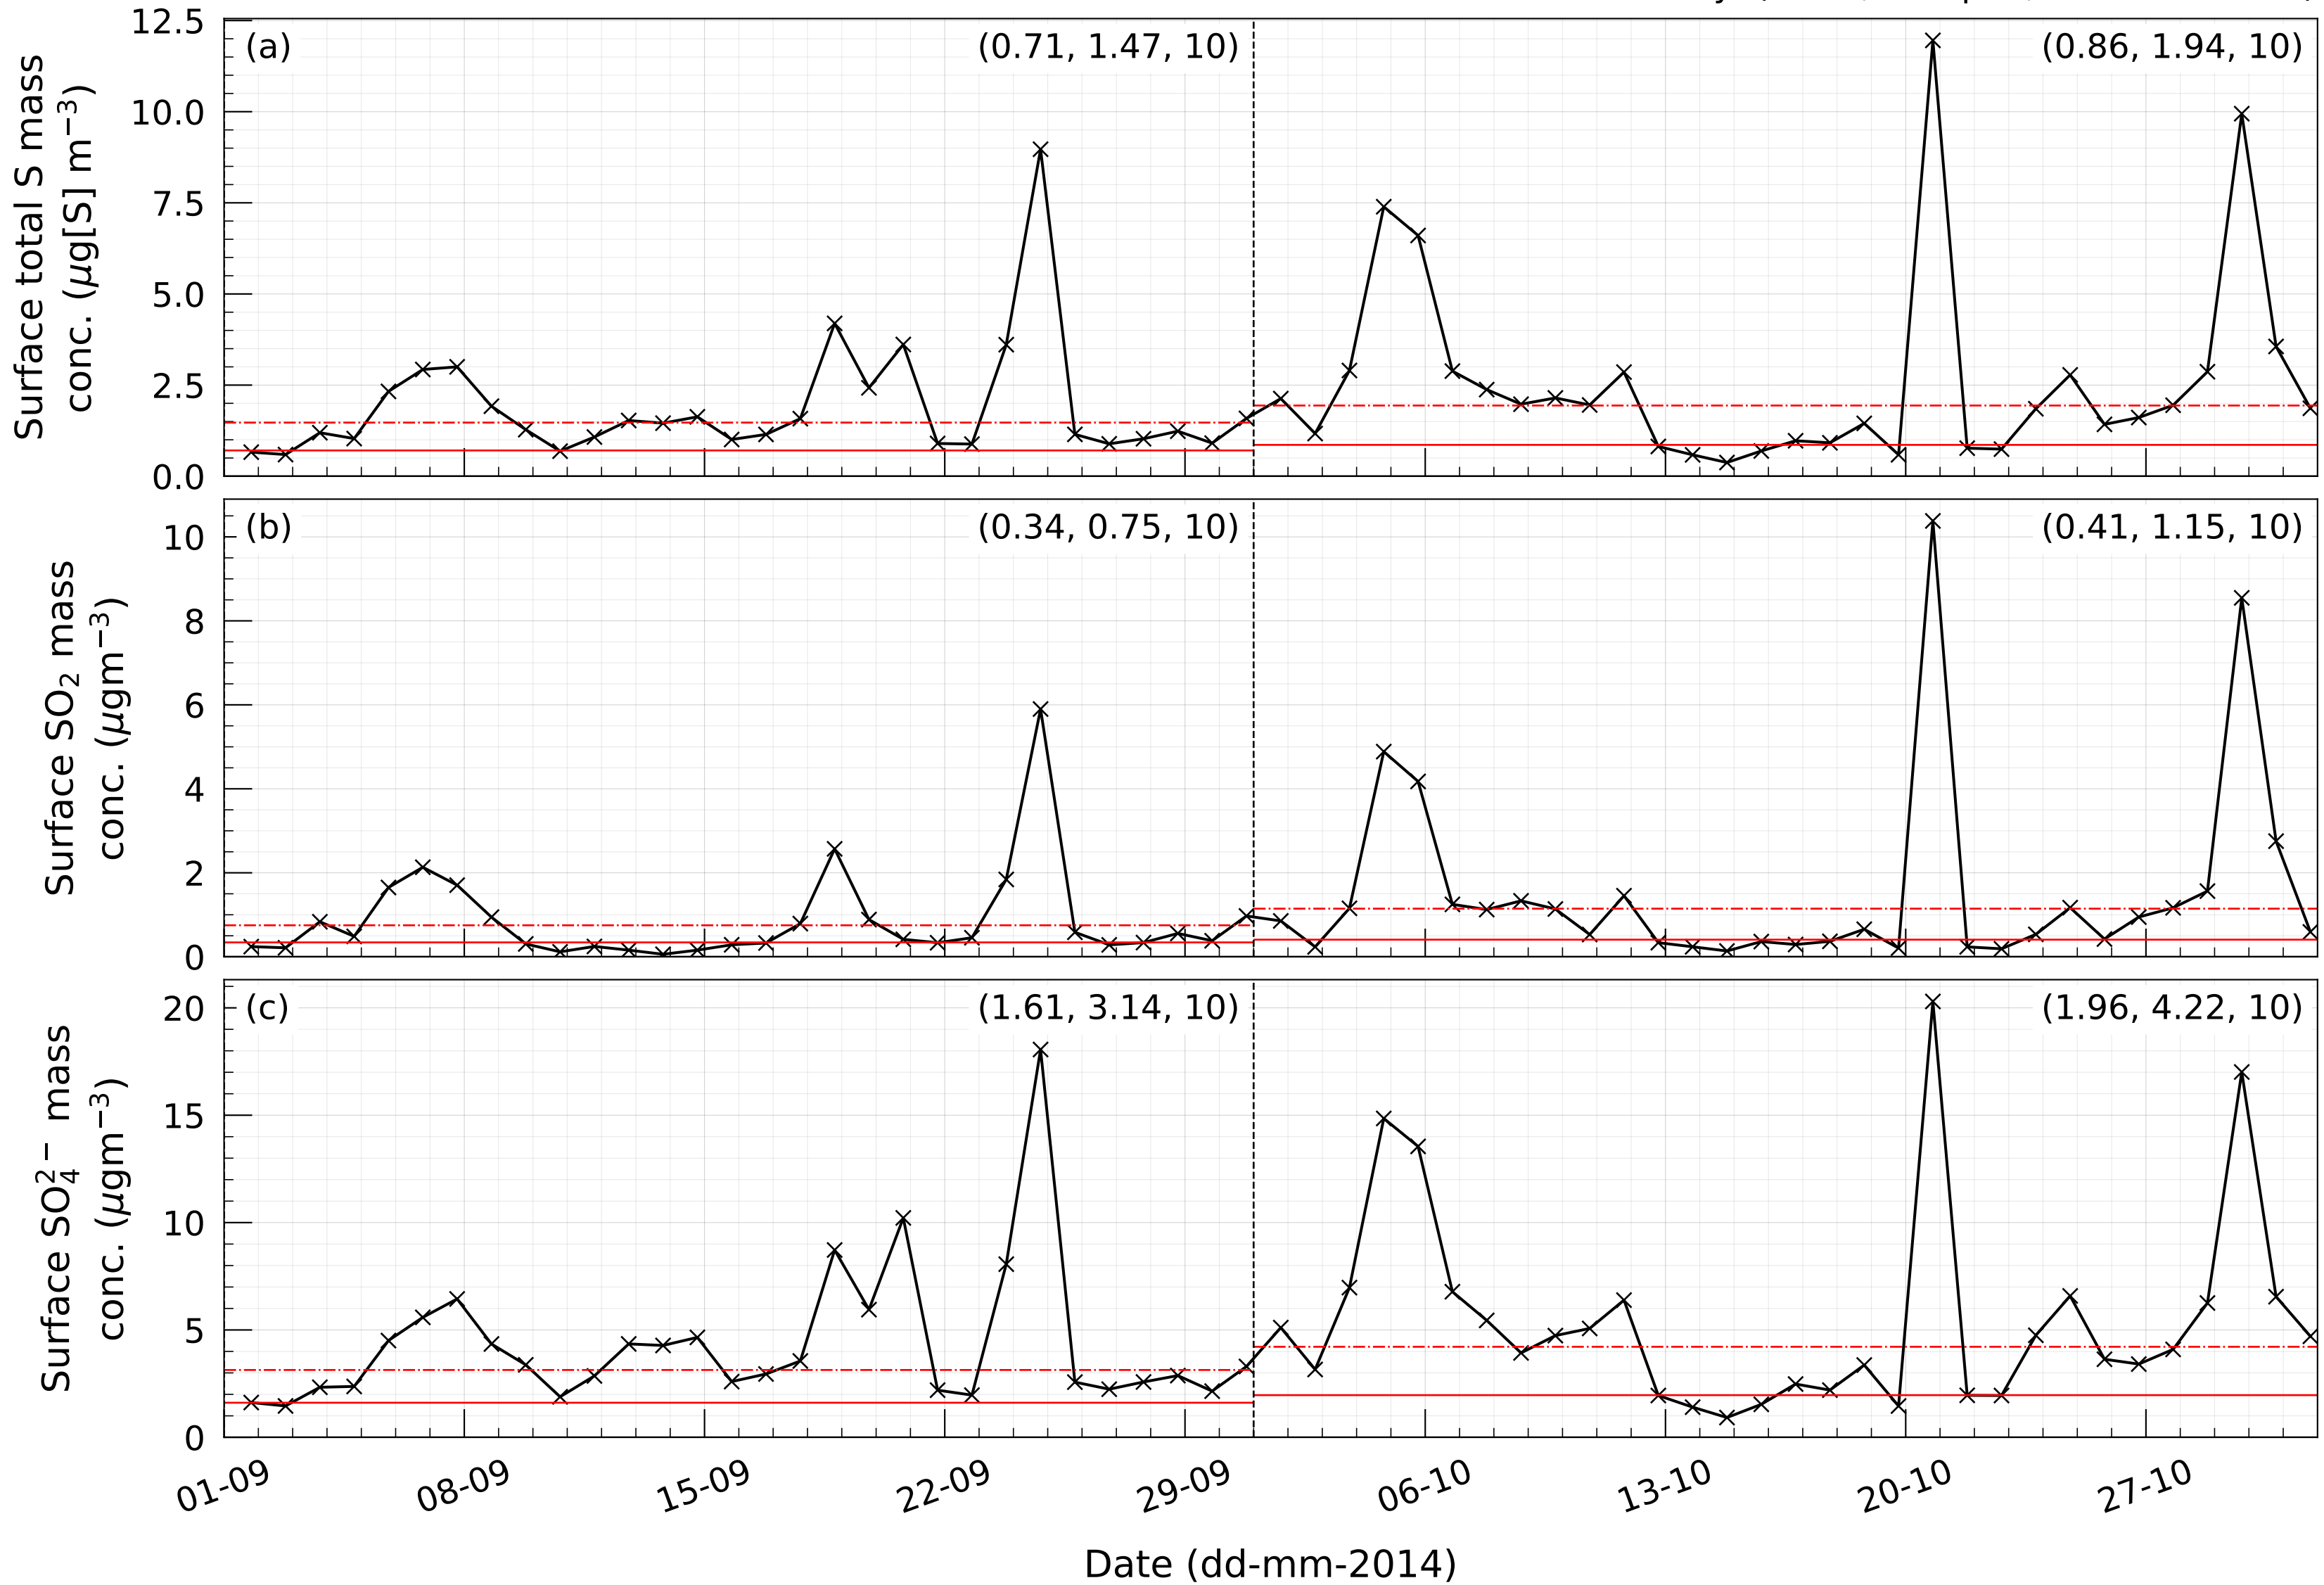

—x— Observations — Mean - - - 90<sup>th</sup> percentile

Supplement: Supplementary file 1 [file acp-24-1939-2024-supplement.zip]

# Harwell

Key: (Mean, 90<sup>th</sup> pct., Months in clim.)

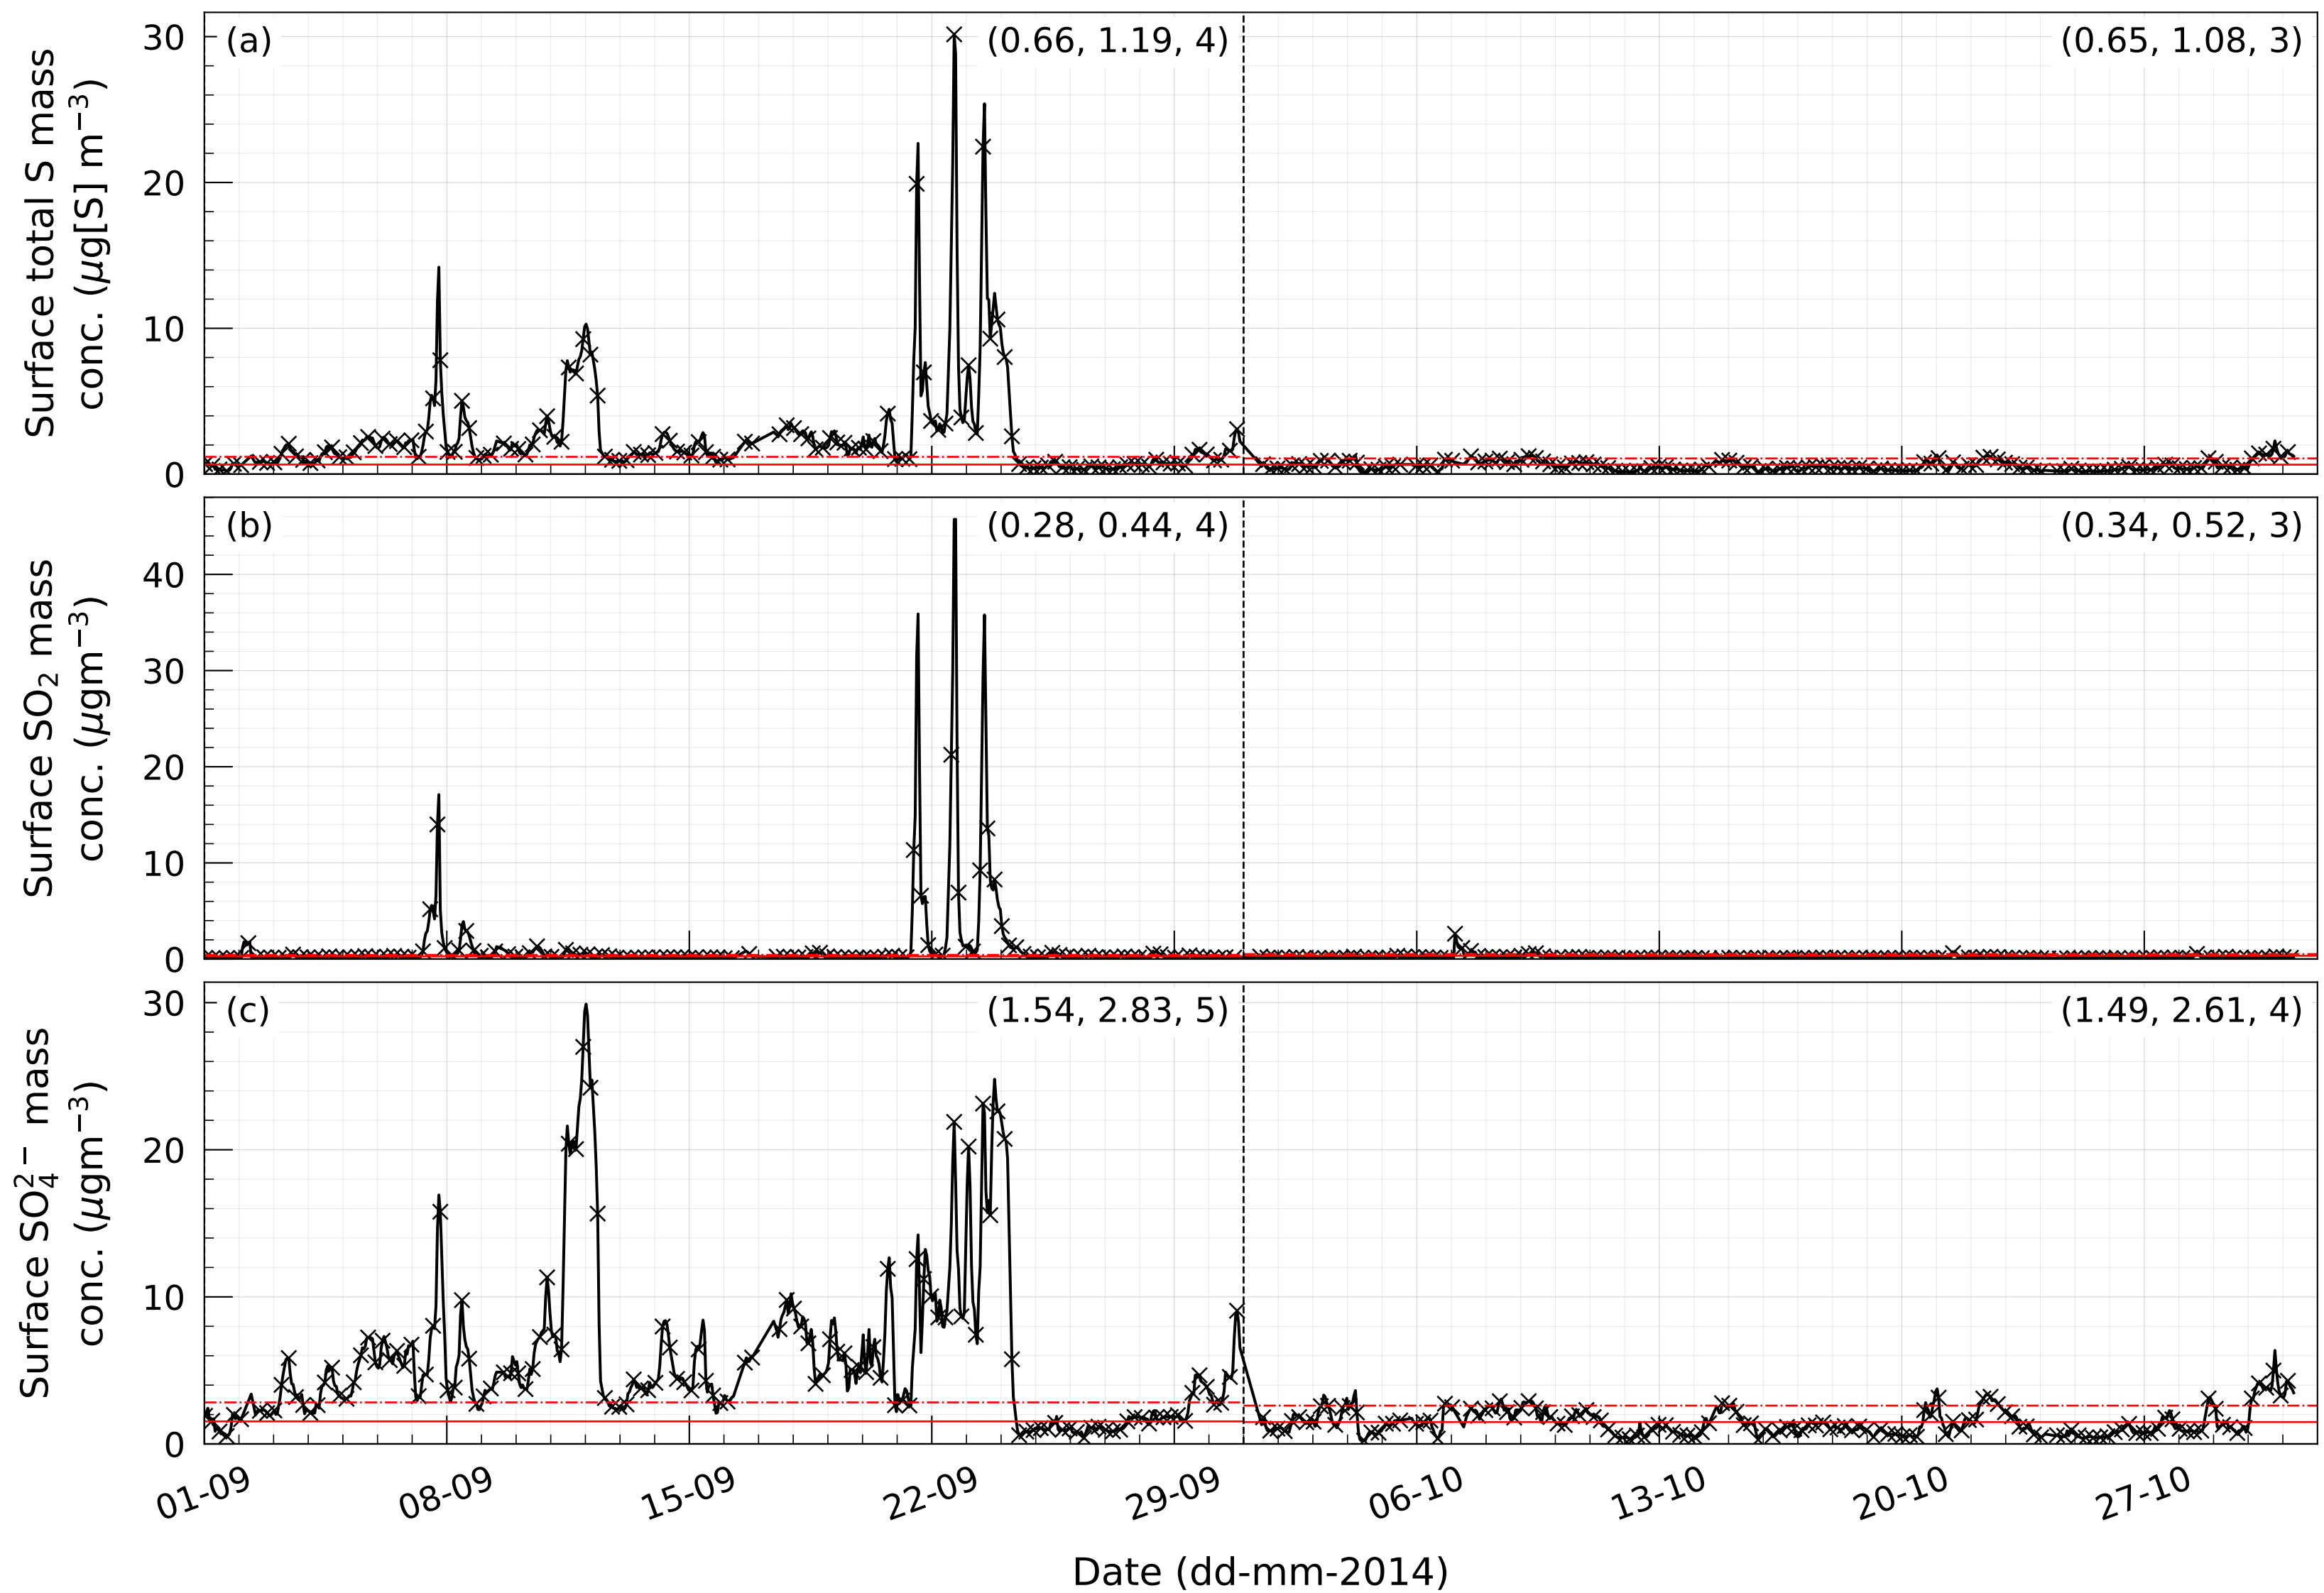

Supplement: Supplementary file 2 [file acp-24-1939-2024-supplement.zip]

# Schauinsland

Key: (Mean, 90<sup>th</sup> pct., Months in clim.)

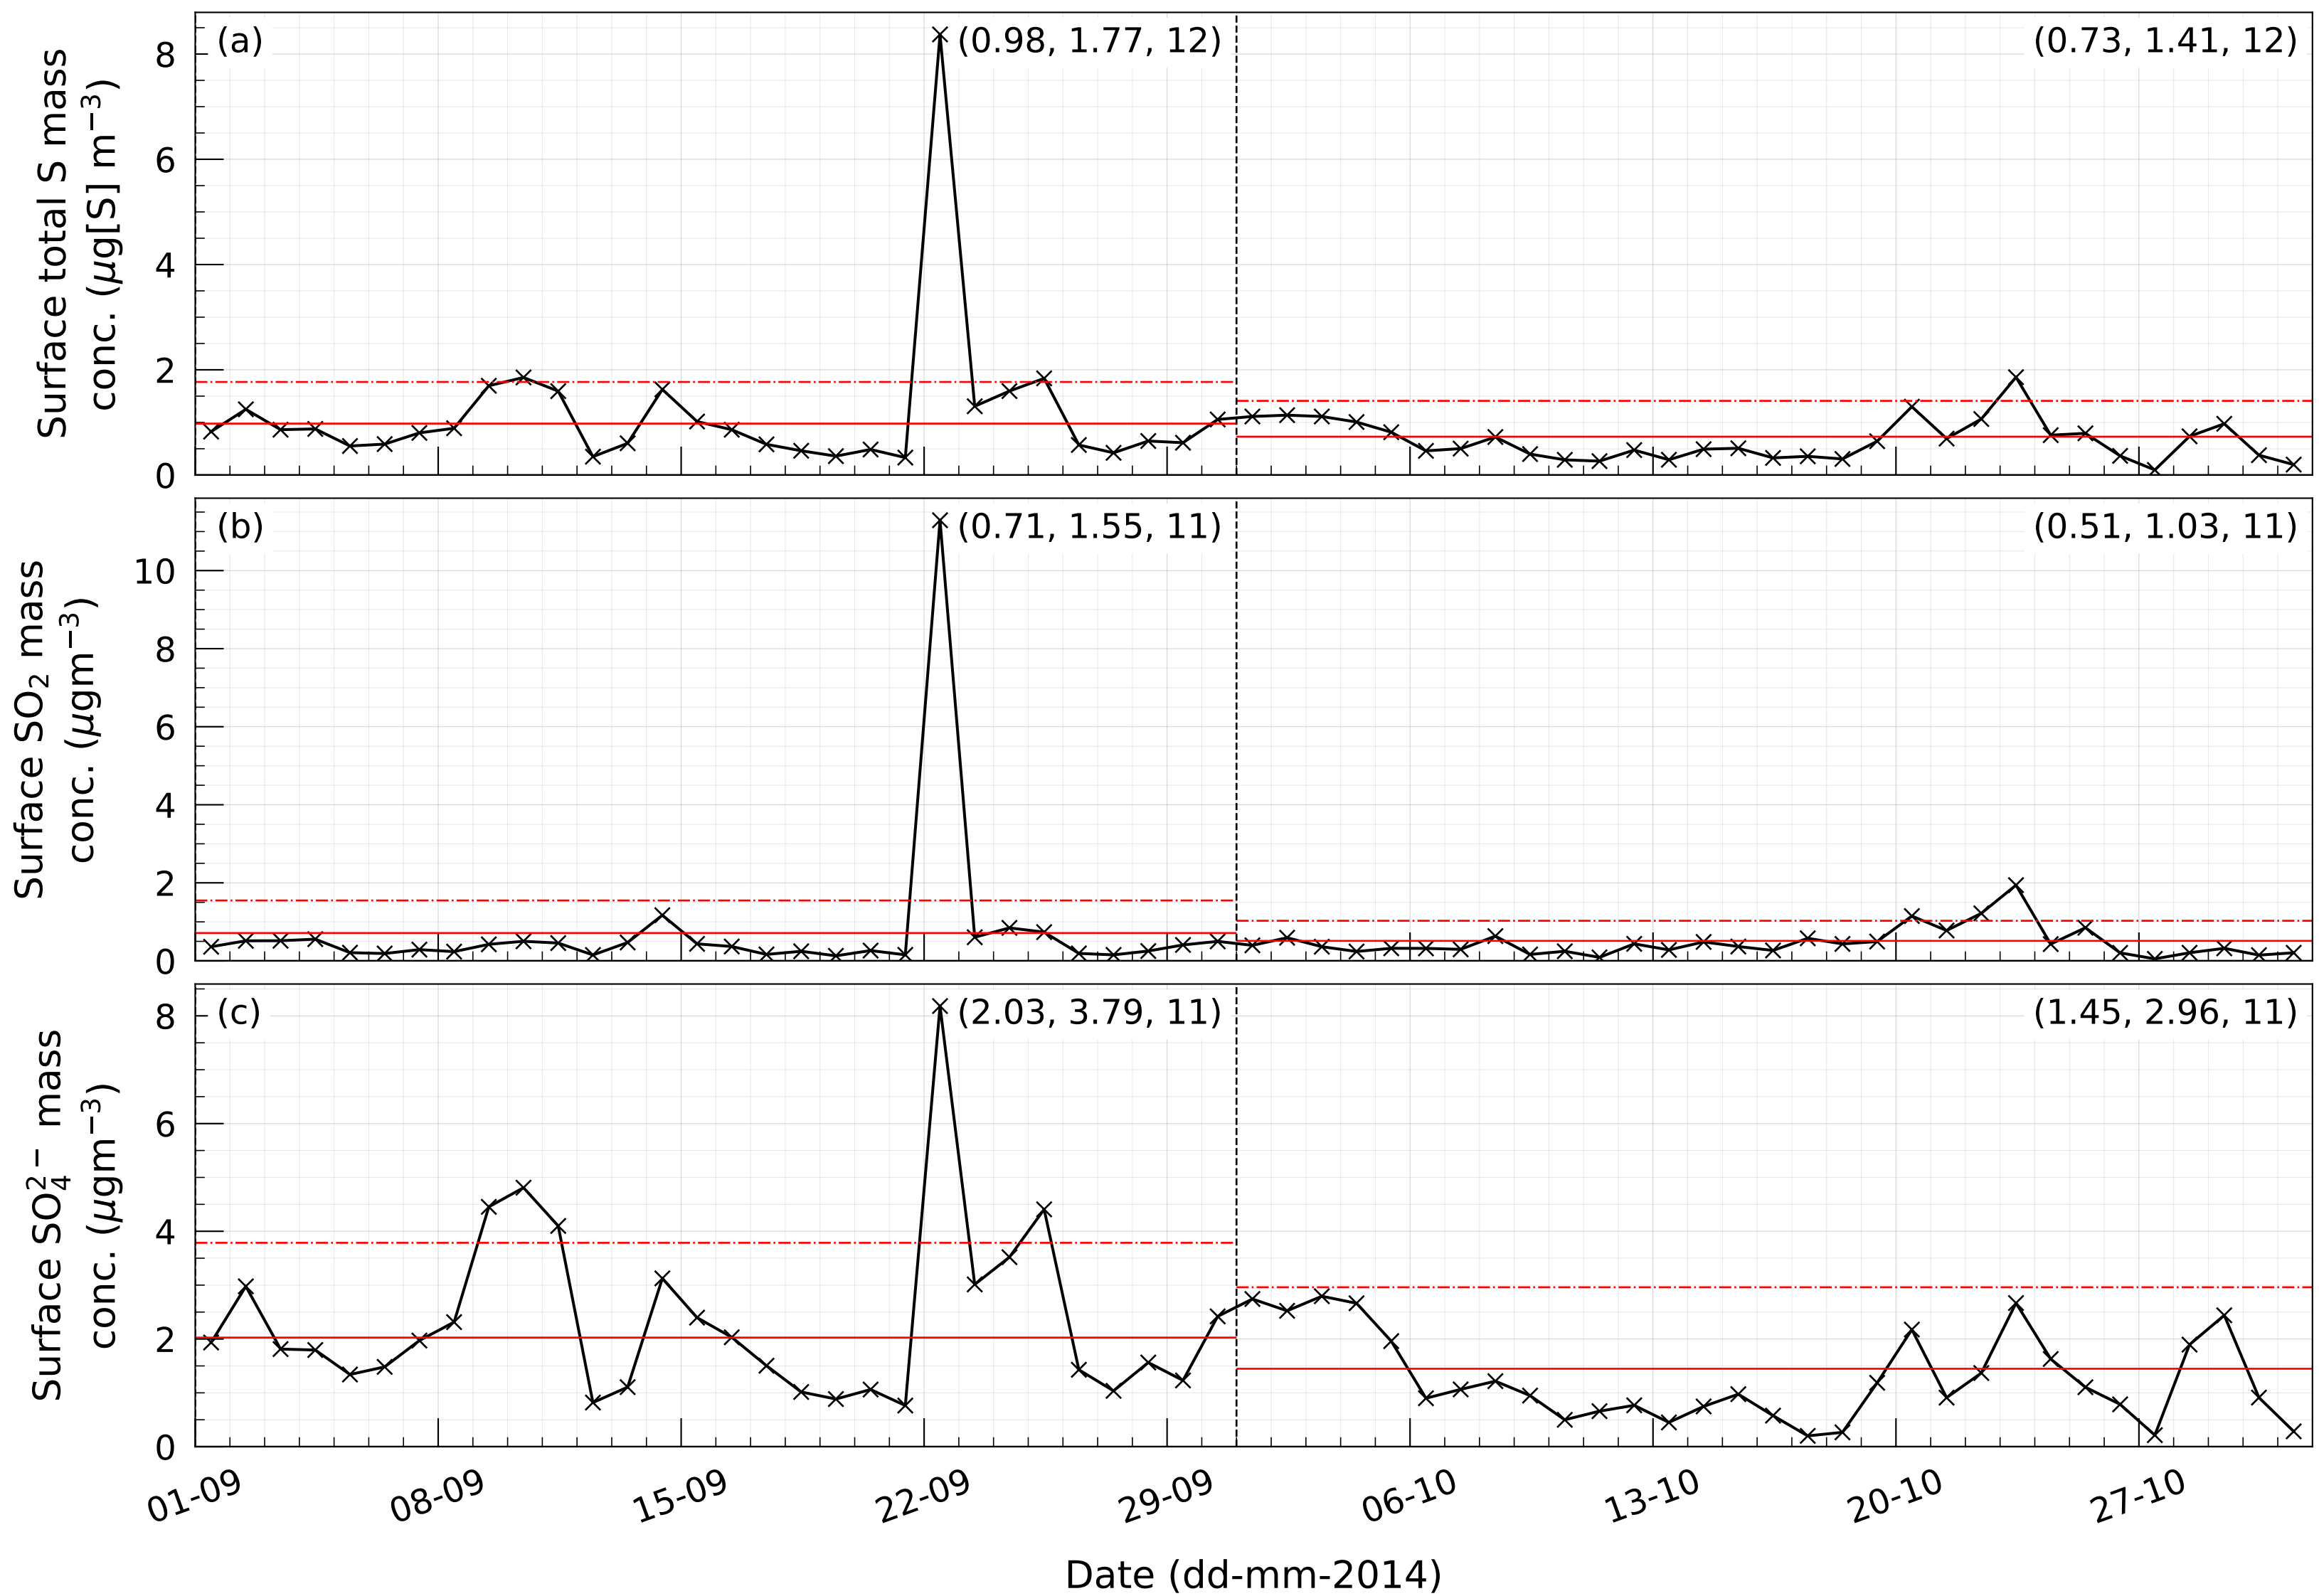

Supplement: Supplementary file 3 [file acp-24-1939-2024-supplement.zip]

# Bredkalen

Key: (Mean, 90<sup>th</sup> pct., Months in clim.)

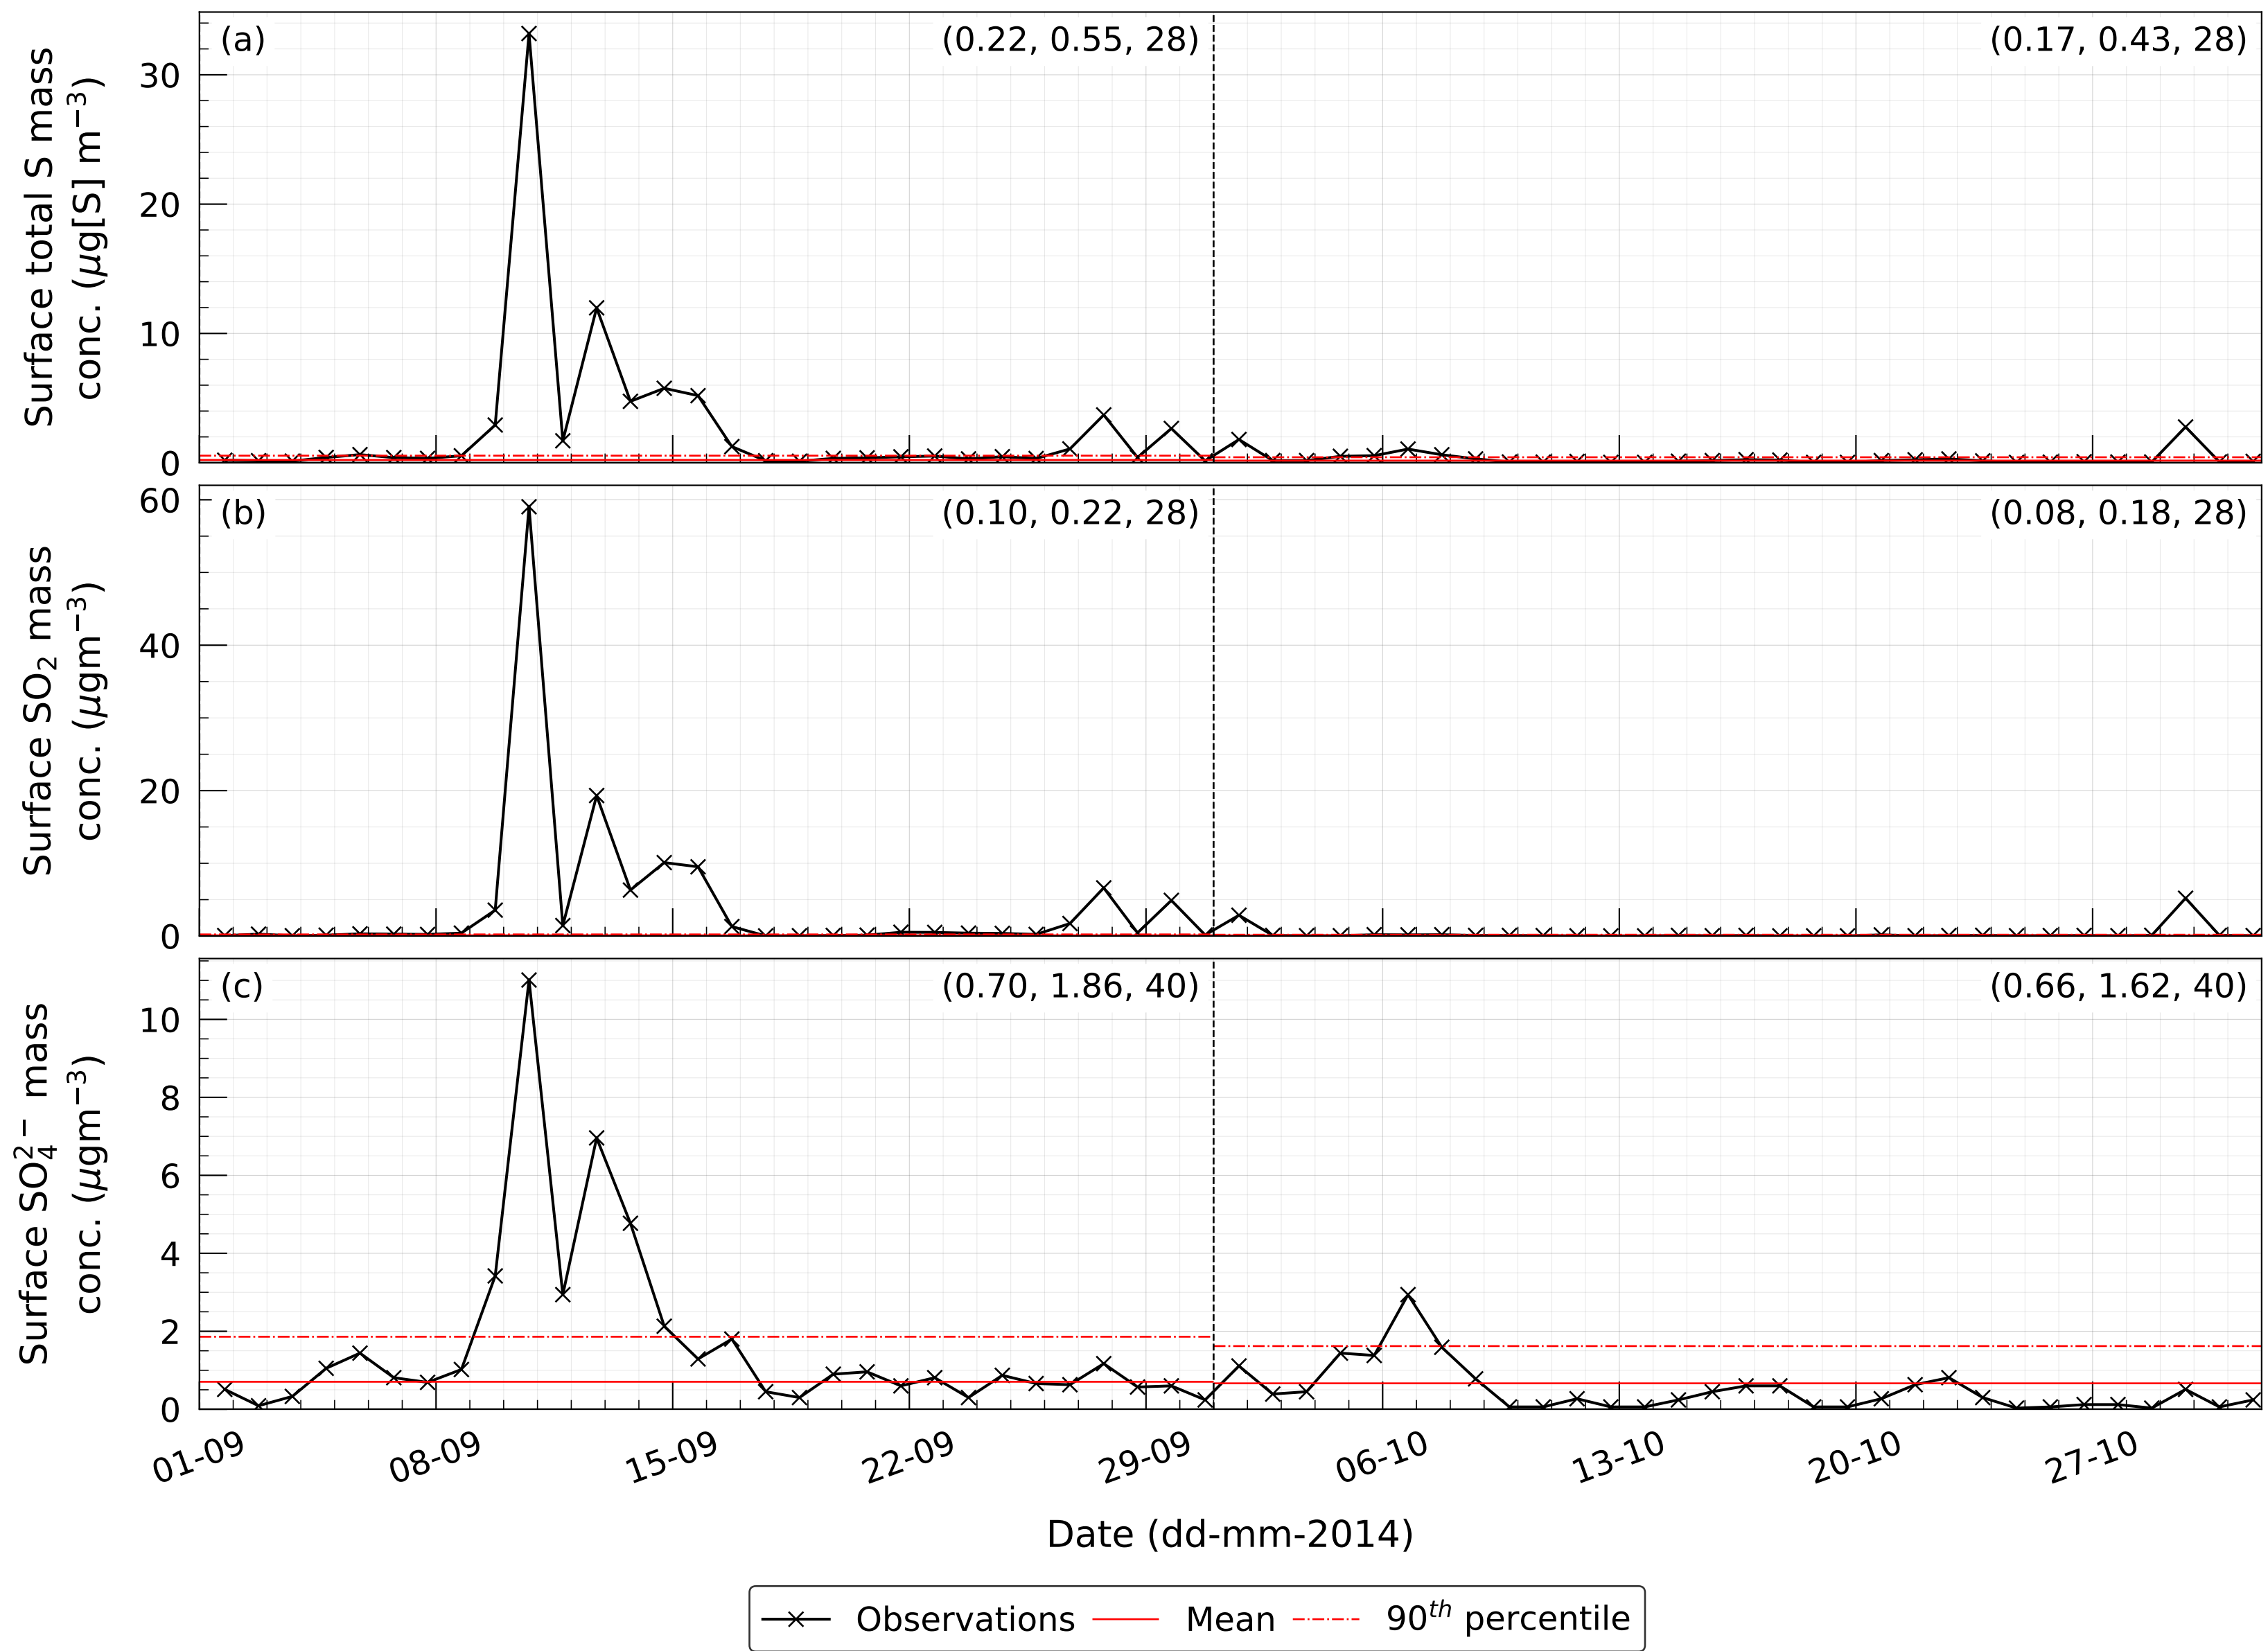

Supplement: Supplementary file 4 [file acp-24-1939-2024-supplement.zip]

Key: (Mean, 90<sup>th</sup> pct., Months in clim.)

# Birkenes-ii

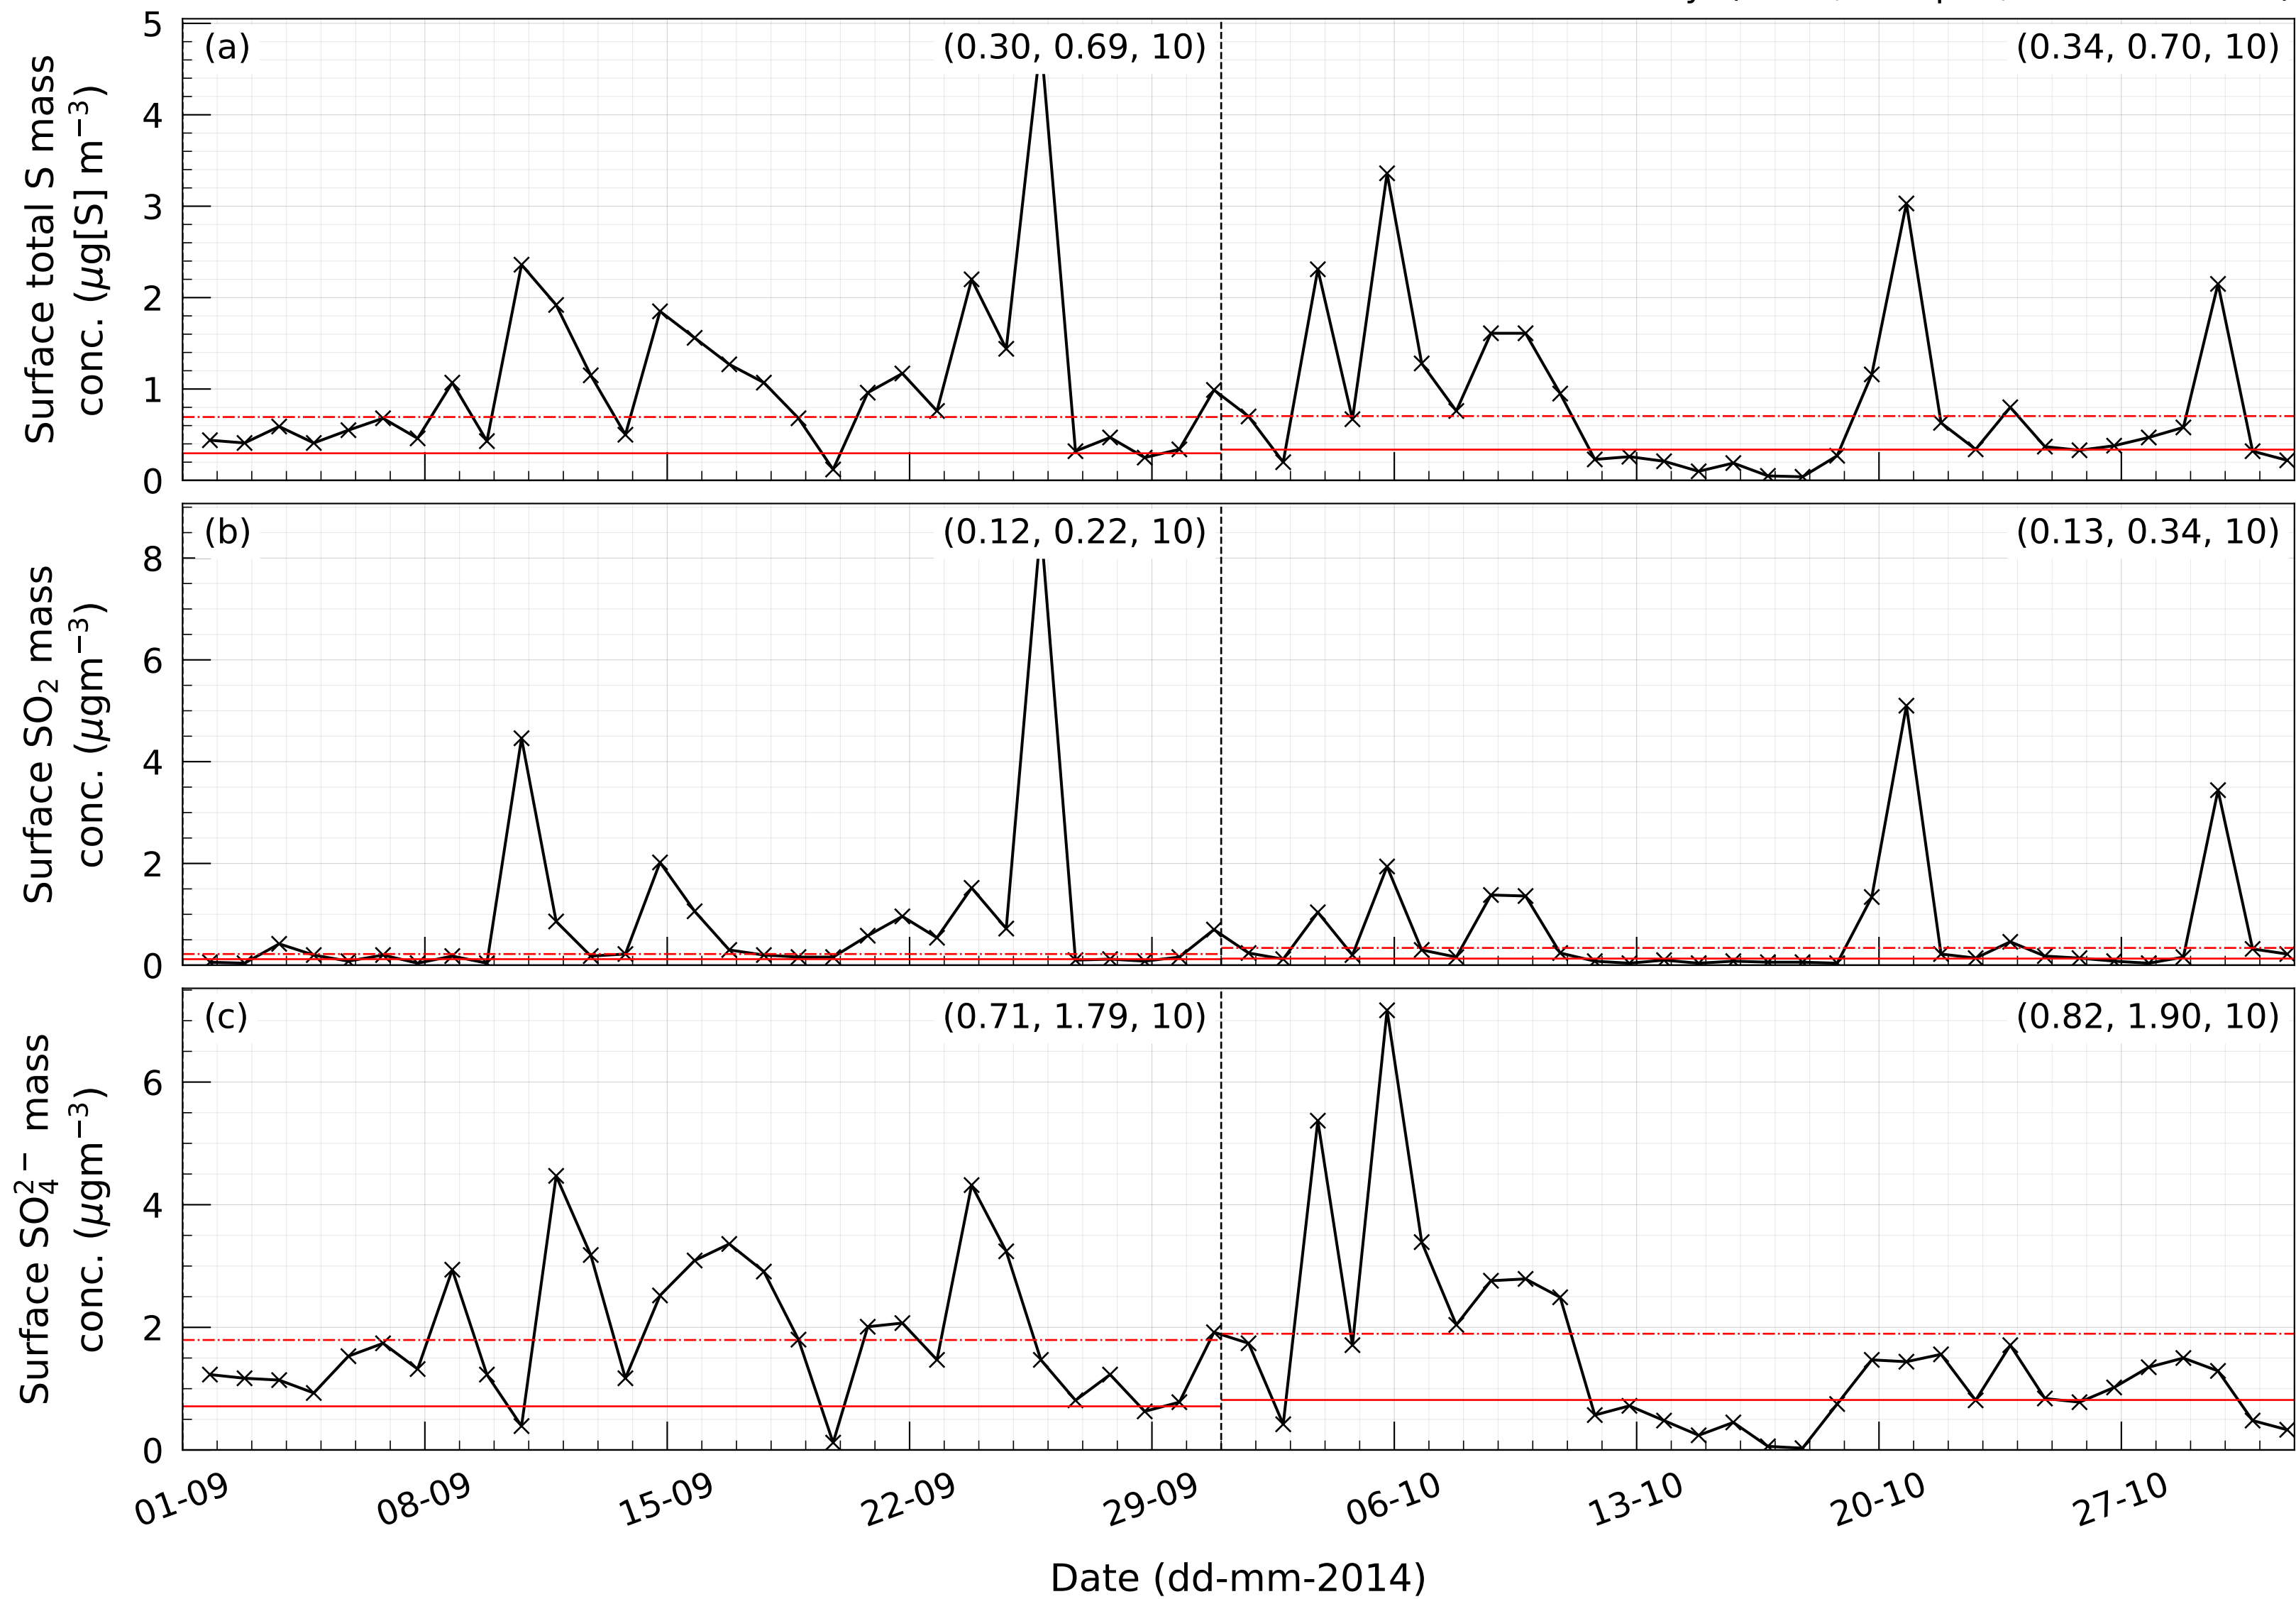

Supplement: Supplementary file 5 [file acp-24-1939-2024-supplement.zip]

# Pallas-(matorova)

Key: (Mean, 90<sup>th</sup> pct., Months in clim.)

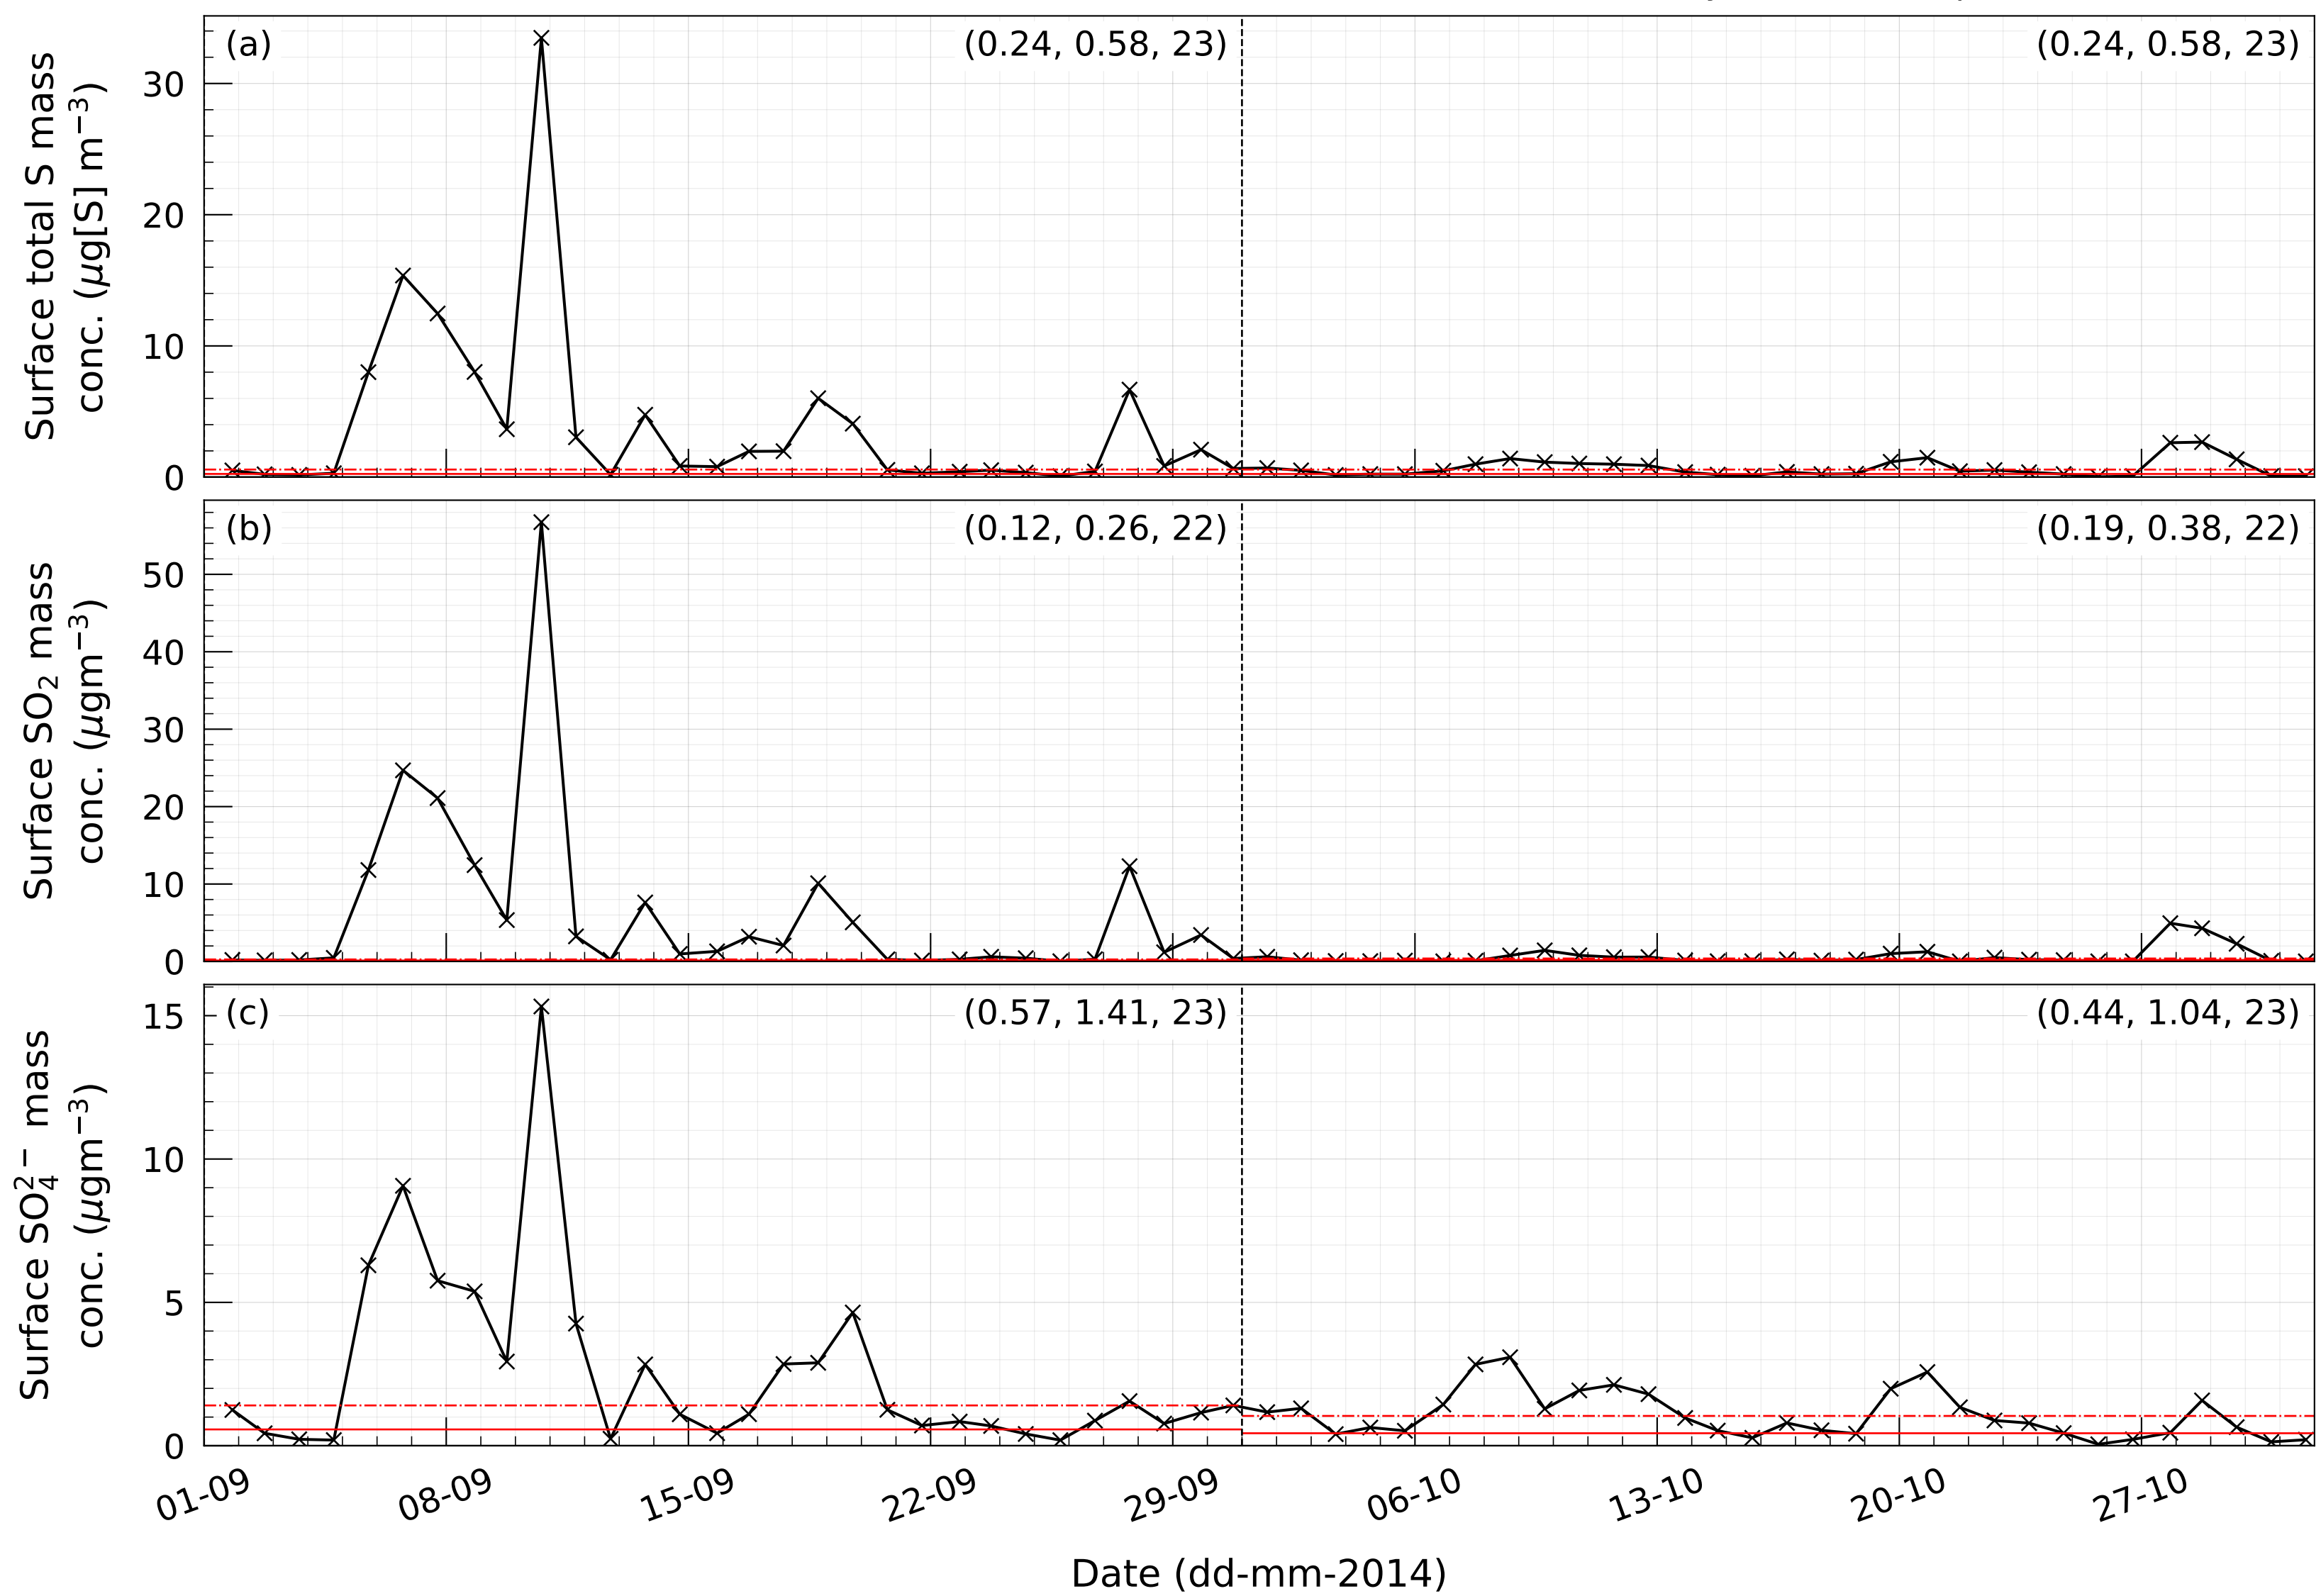

Supplement: Supplementary file 6 [file acp-24-1939-2024-supplement.zip]

# Zeppelin-mountain-(ny-alesund)

Key: (Mean, 90<sup>th</sup> pct., Months in clim.)

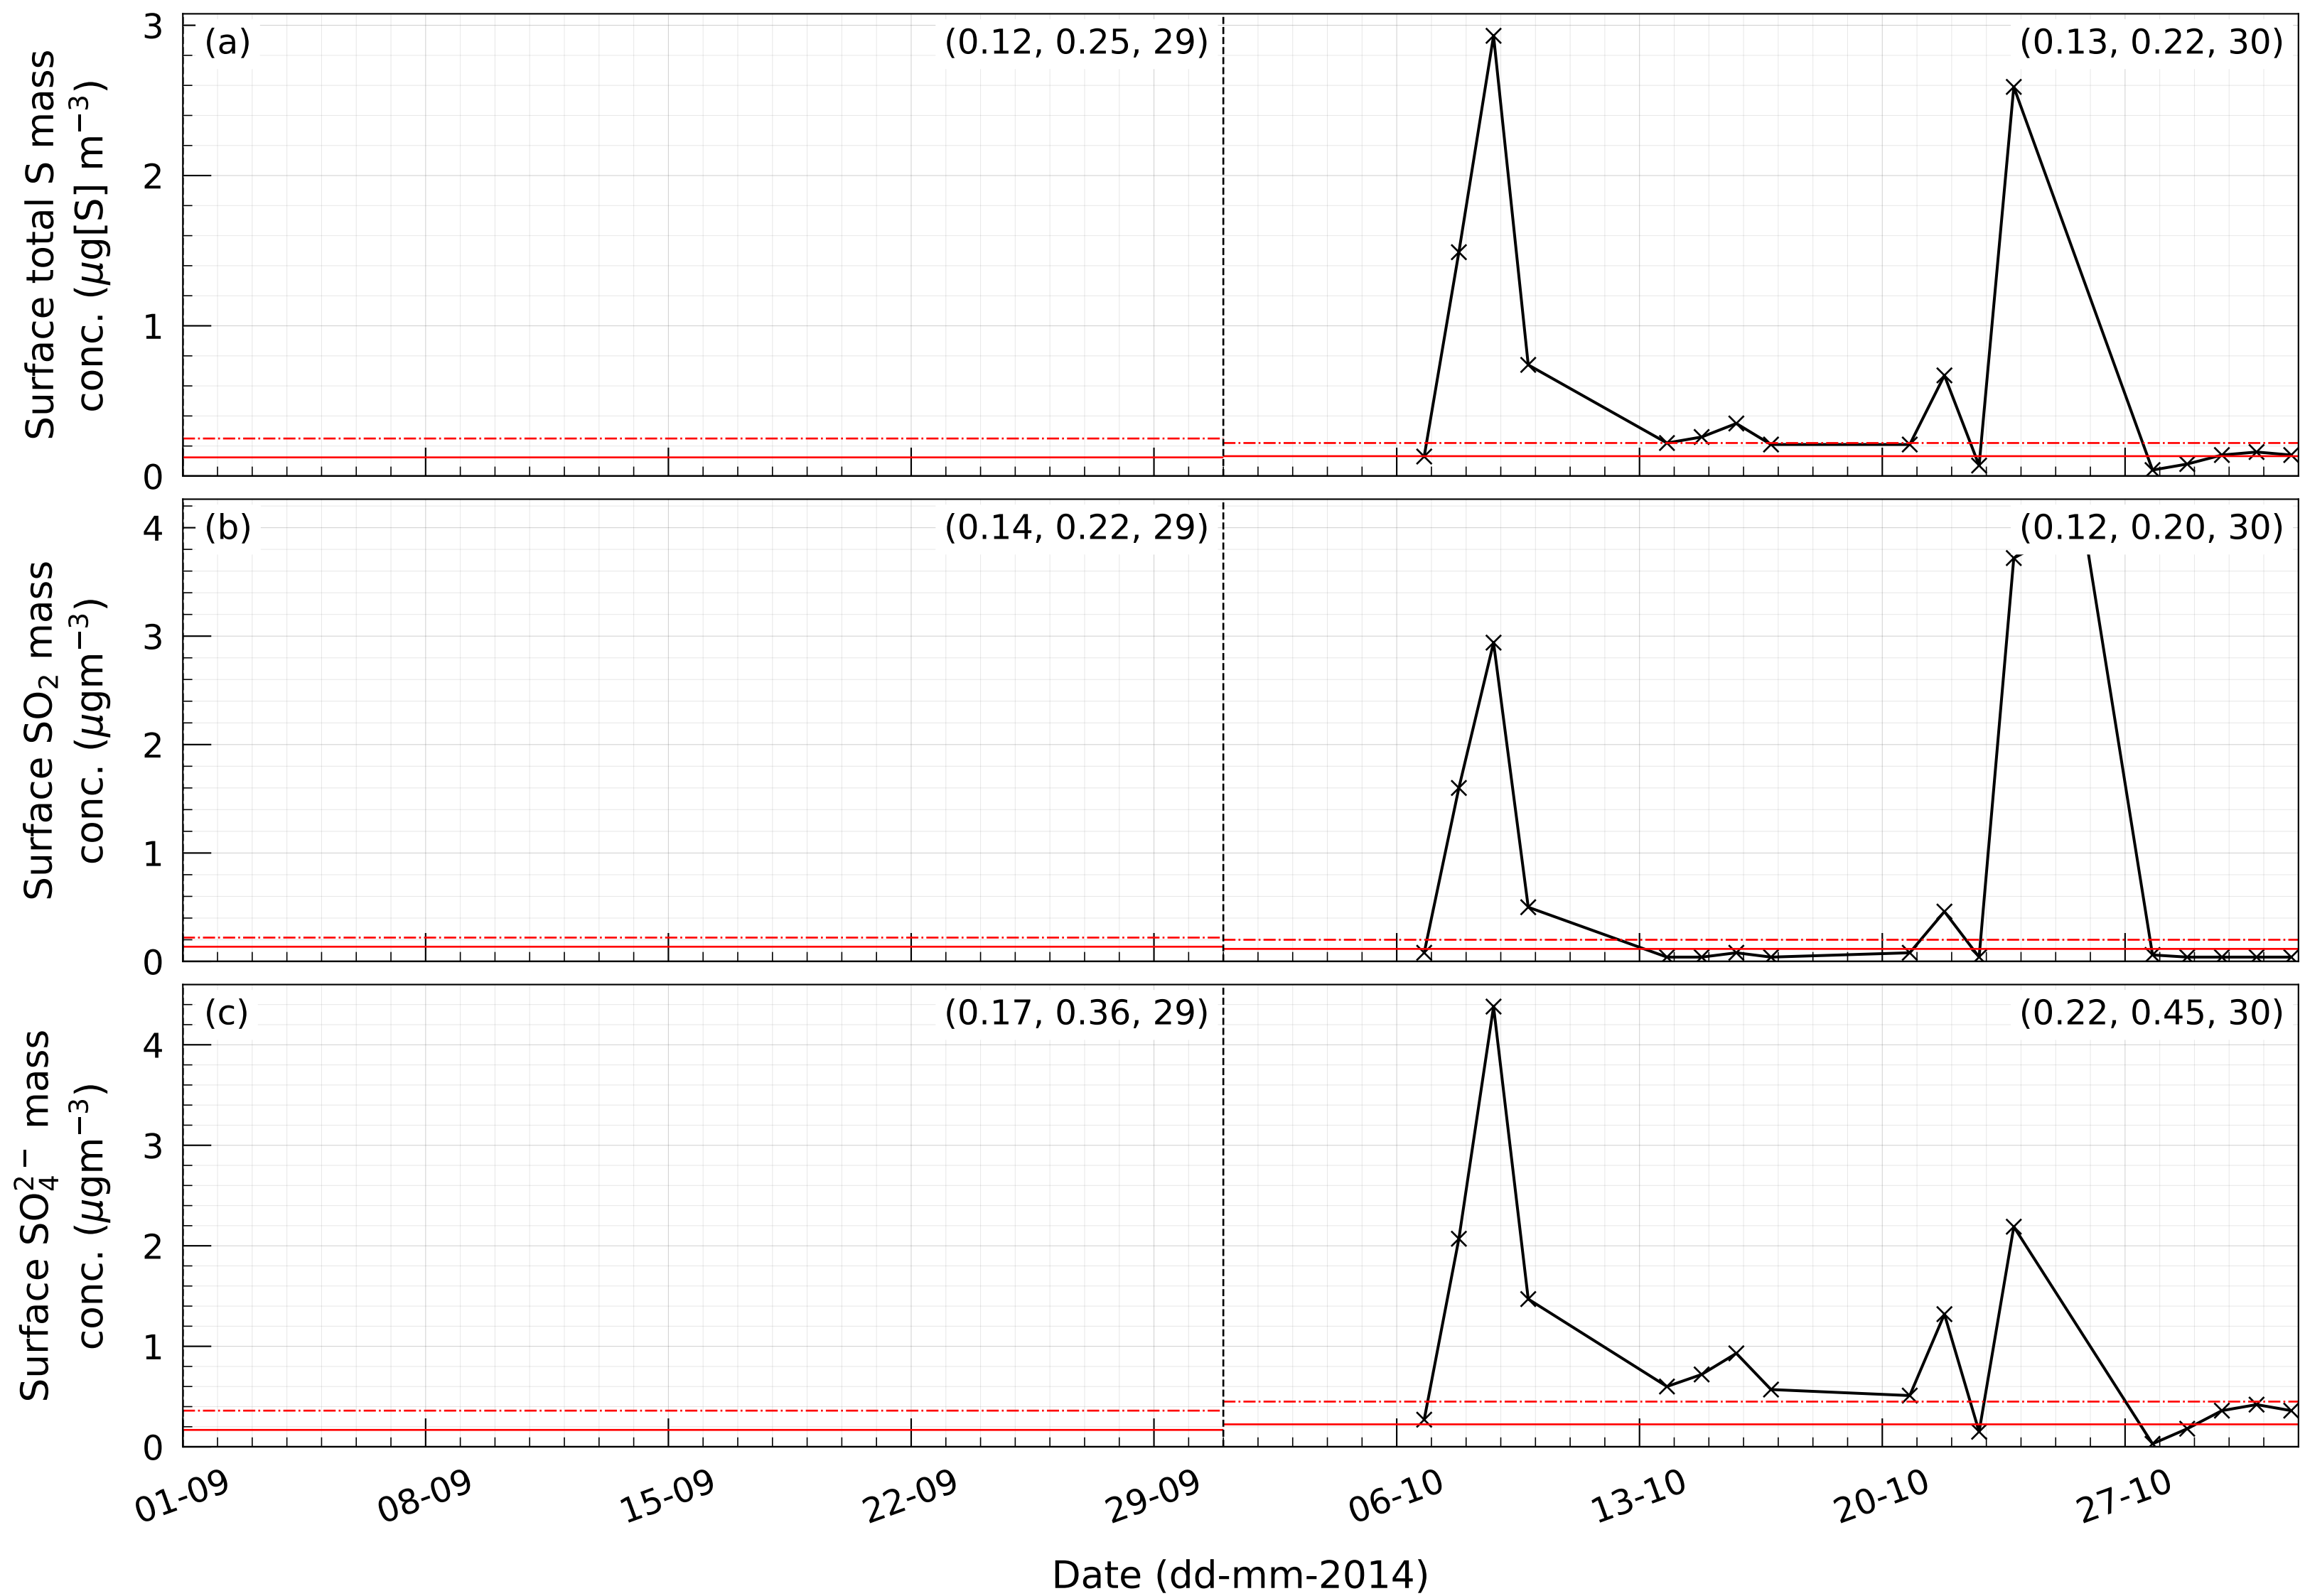

Supplement: Supplementary file 7 [file acp-24-1939-2024-supplement.zip]

# Aspvreten

Key: (Mean, 90<sup>th</sup> pct., Months in clim.)

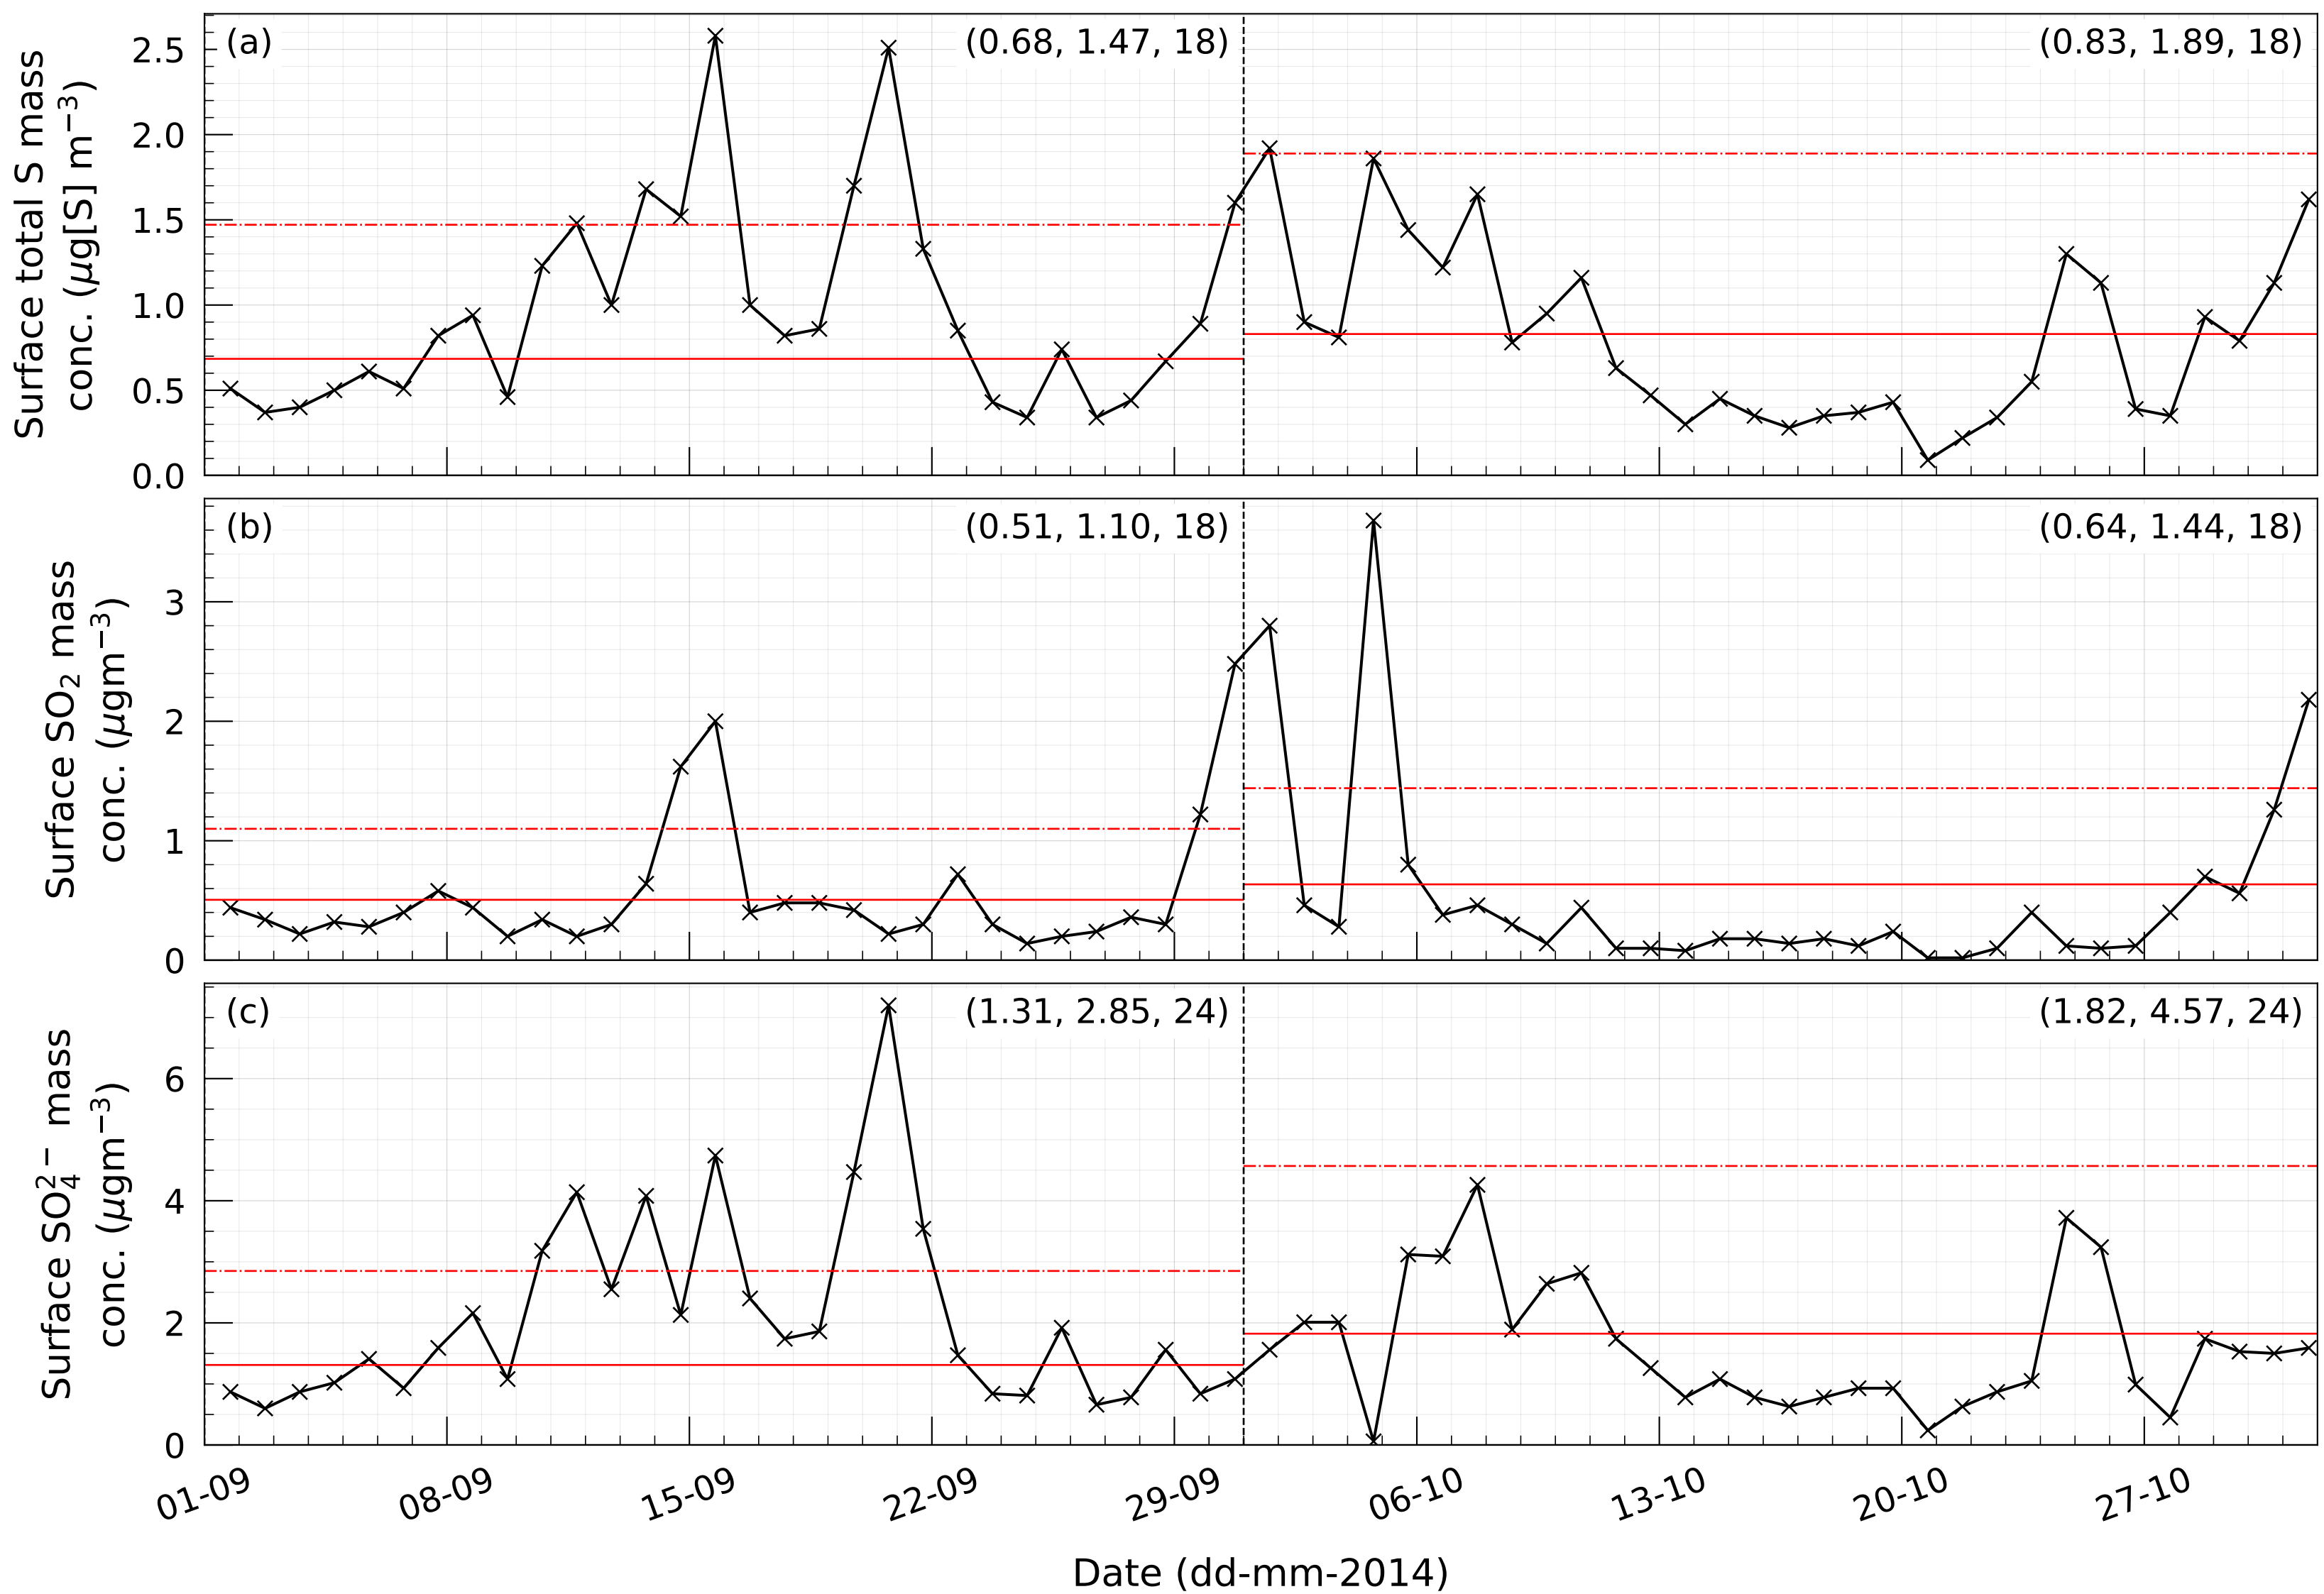

—x— Observations — Mean -.- 90<sup>th</sup> percentile

Supplement: Supplementary file 8 [file acp-24-1939-2024-supplement.zip]

# Neuglobsow

Key: (Mean, 90<sup>th</sup> pct., Months in clim.)

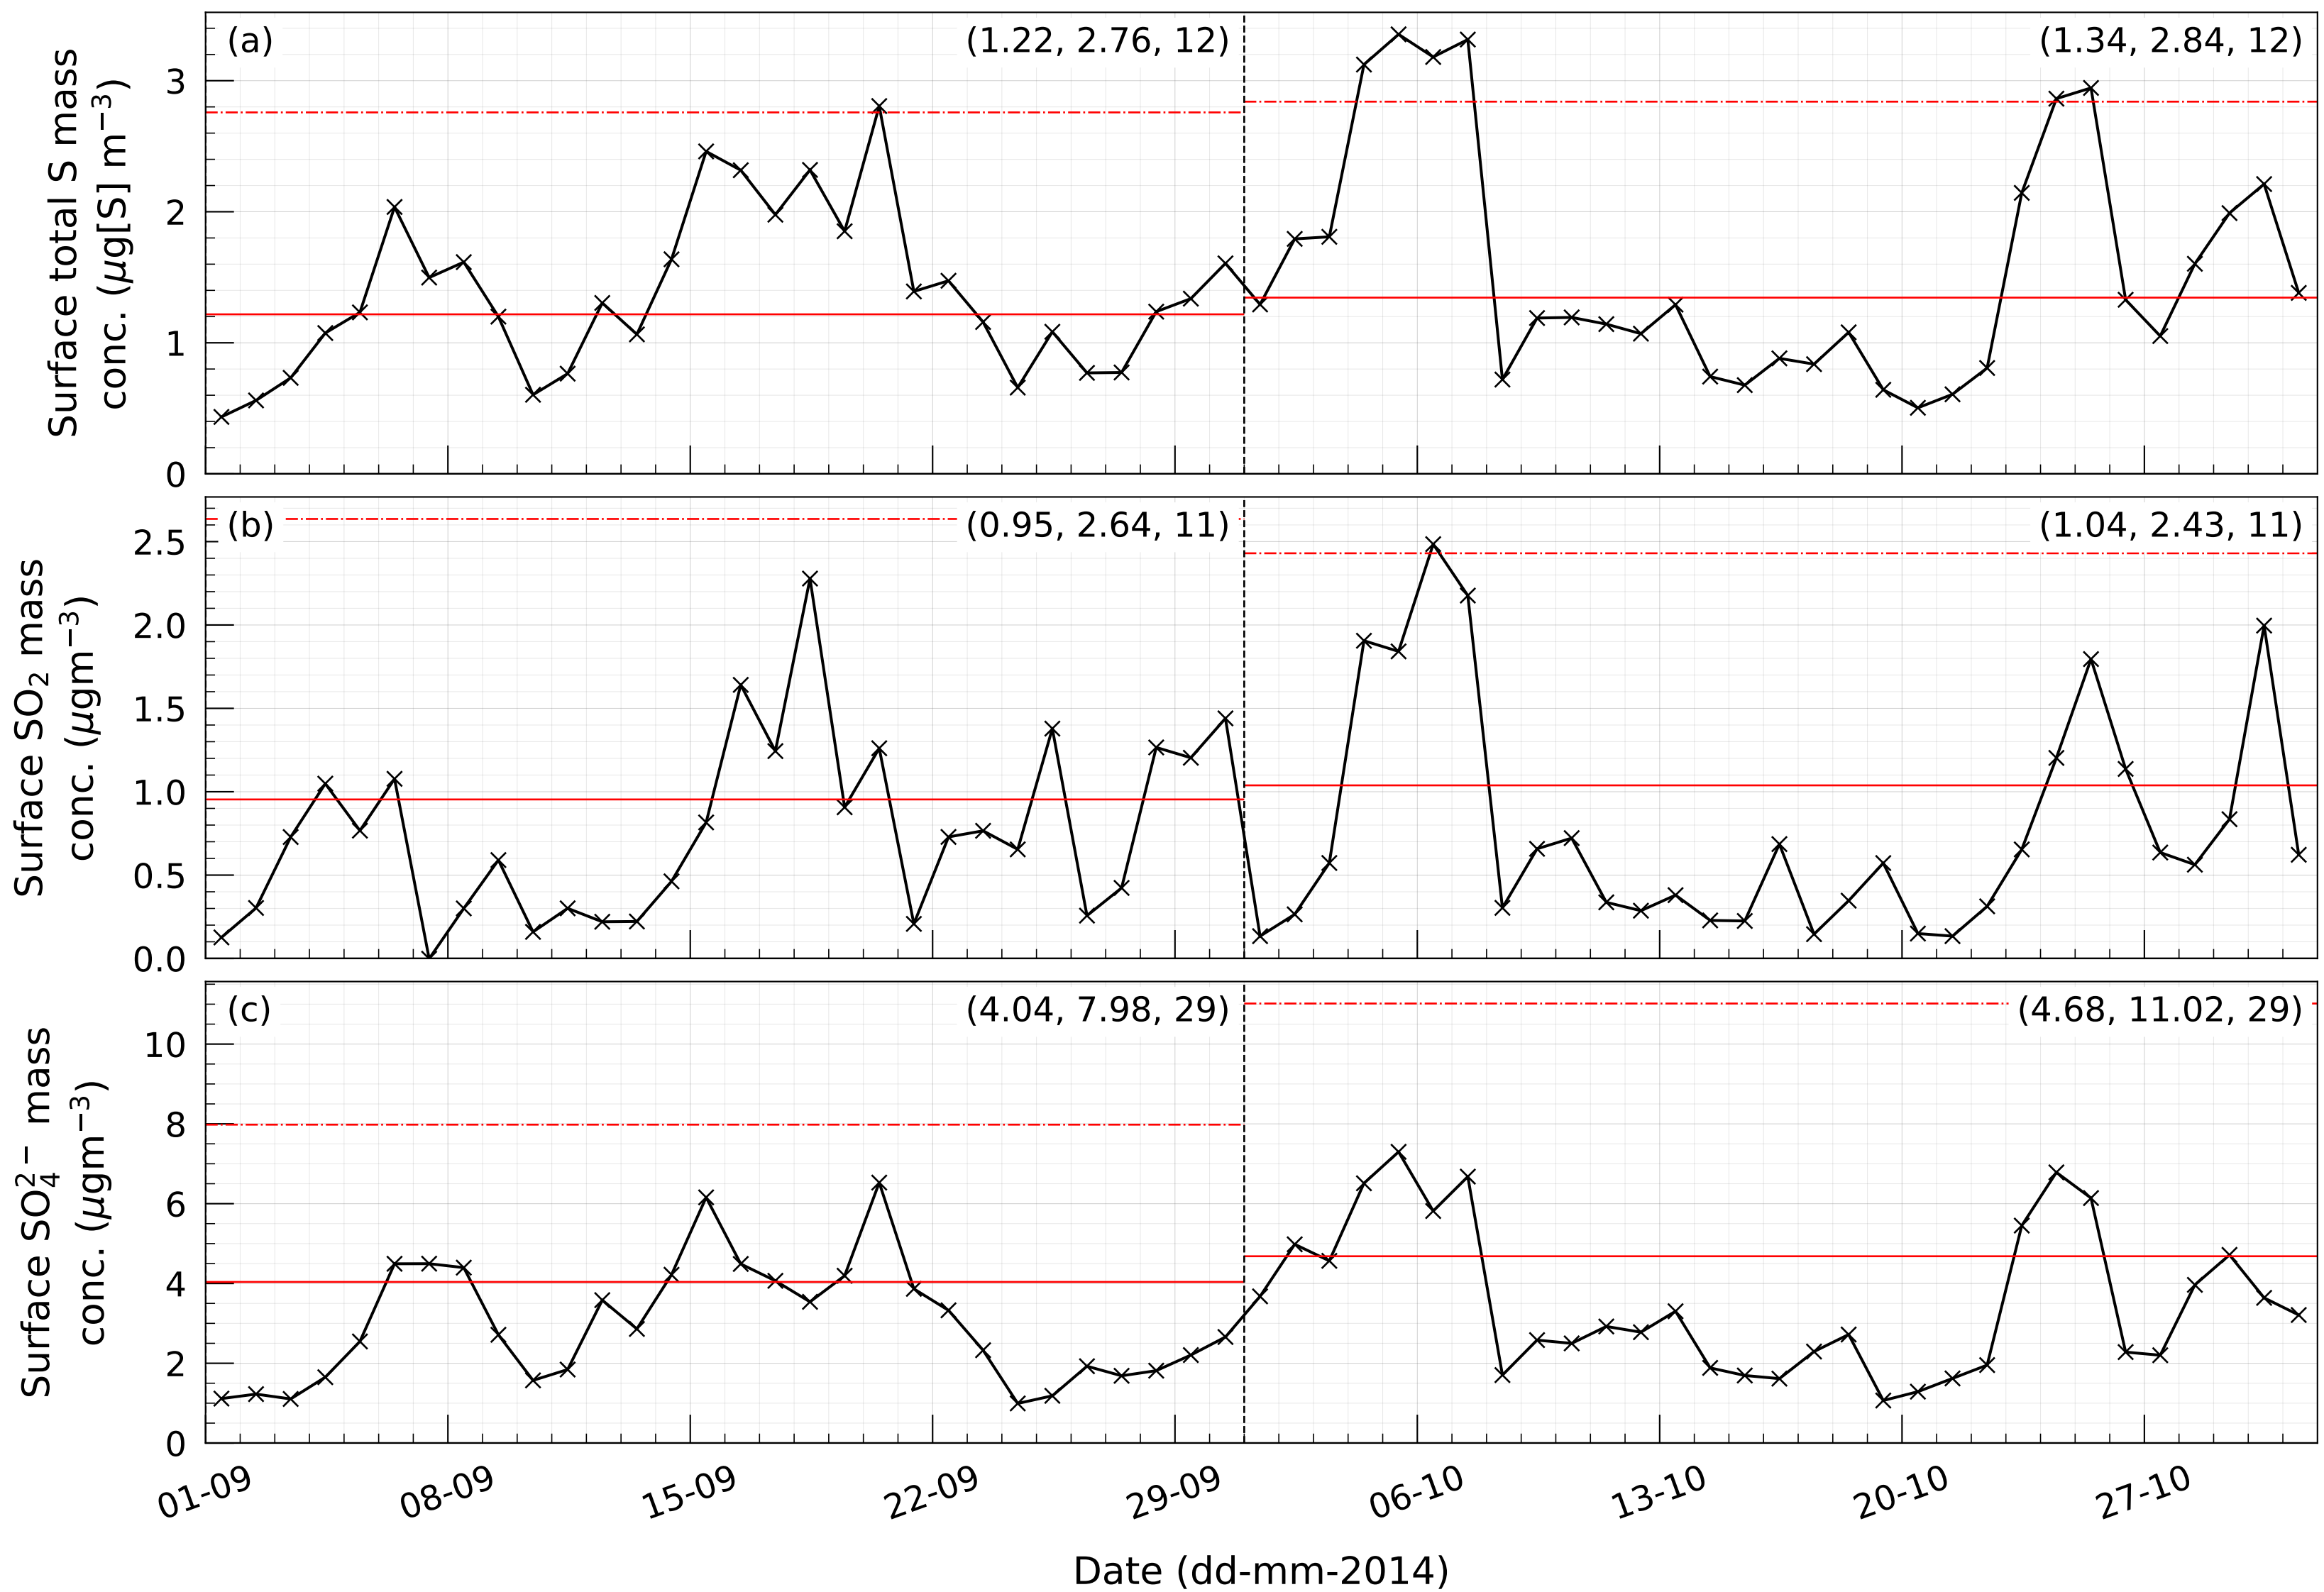

—x— Observations — Mean - - - 90<sup>th</sup> percentile

Supplement: Supplementary file 9 [file acp-24-1939-2024-supplement.zip]

Key: (Mean, 90<sup>th</sup> pct., Months in clim.)

# Hurdal

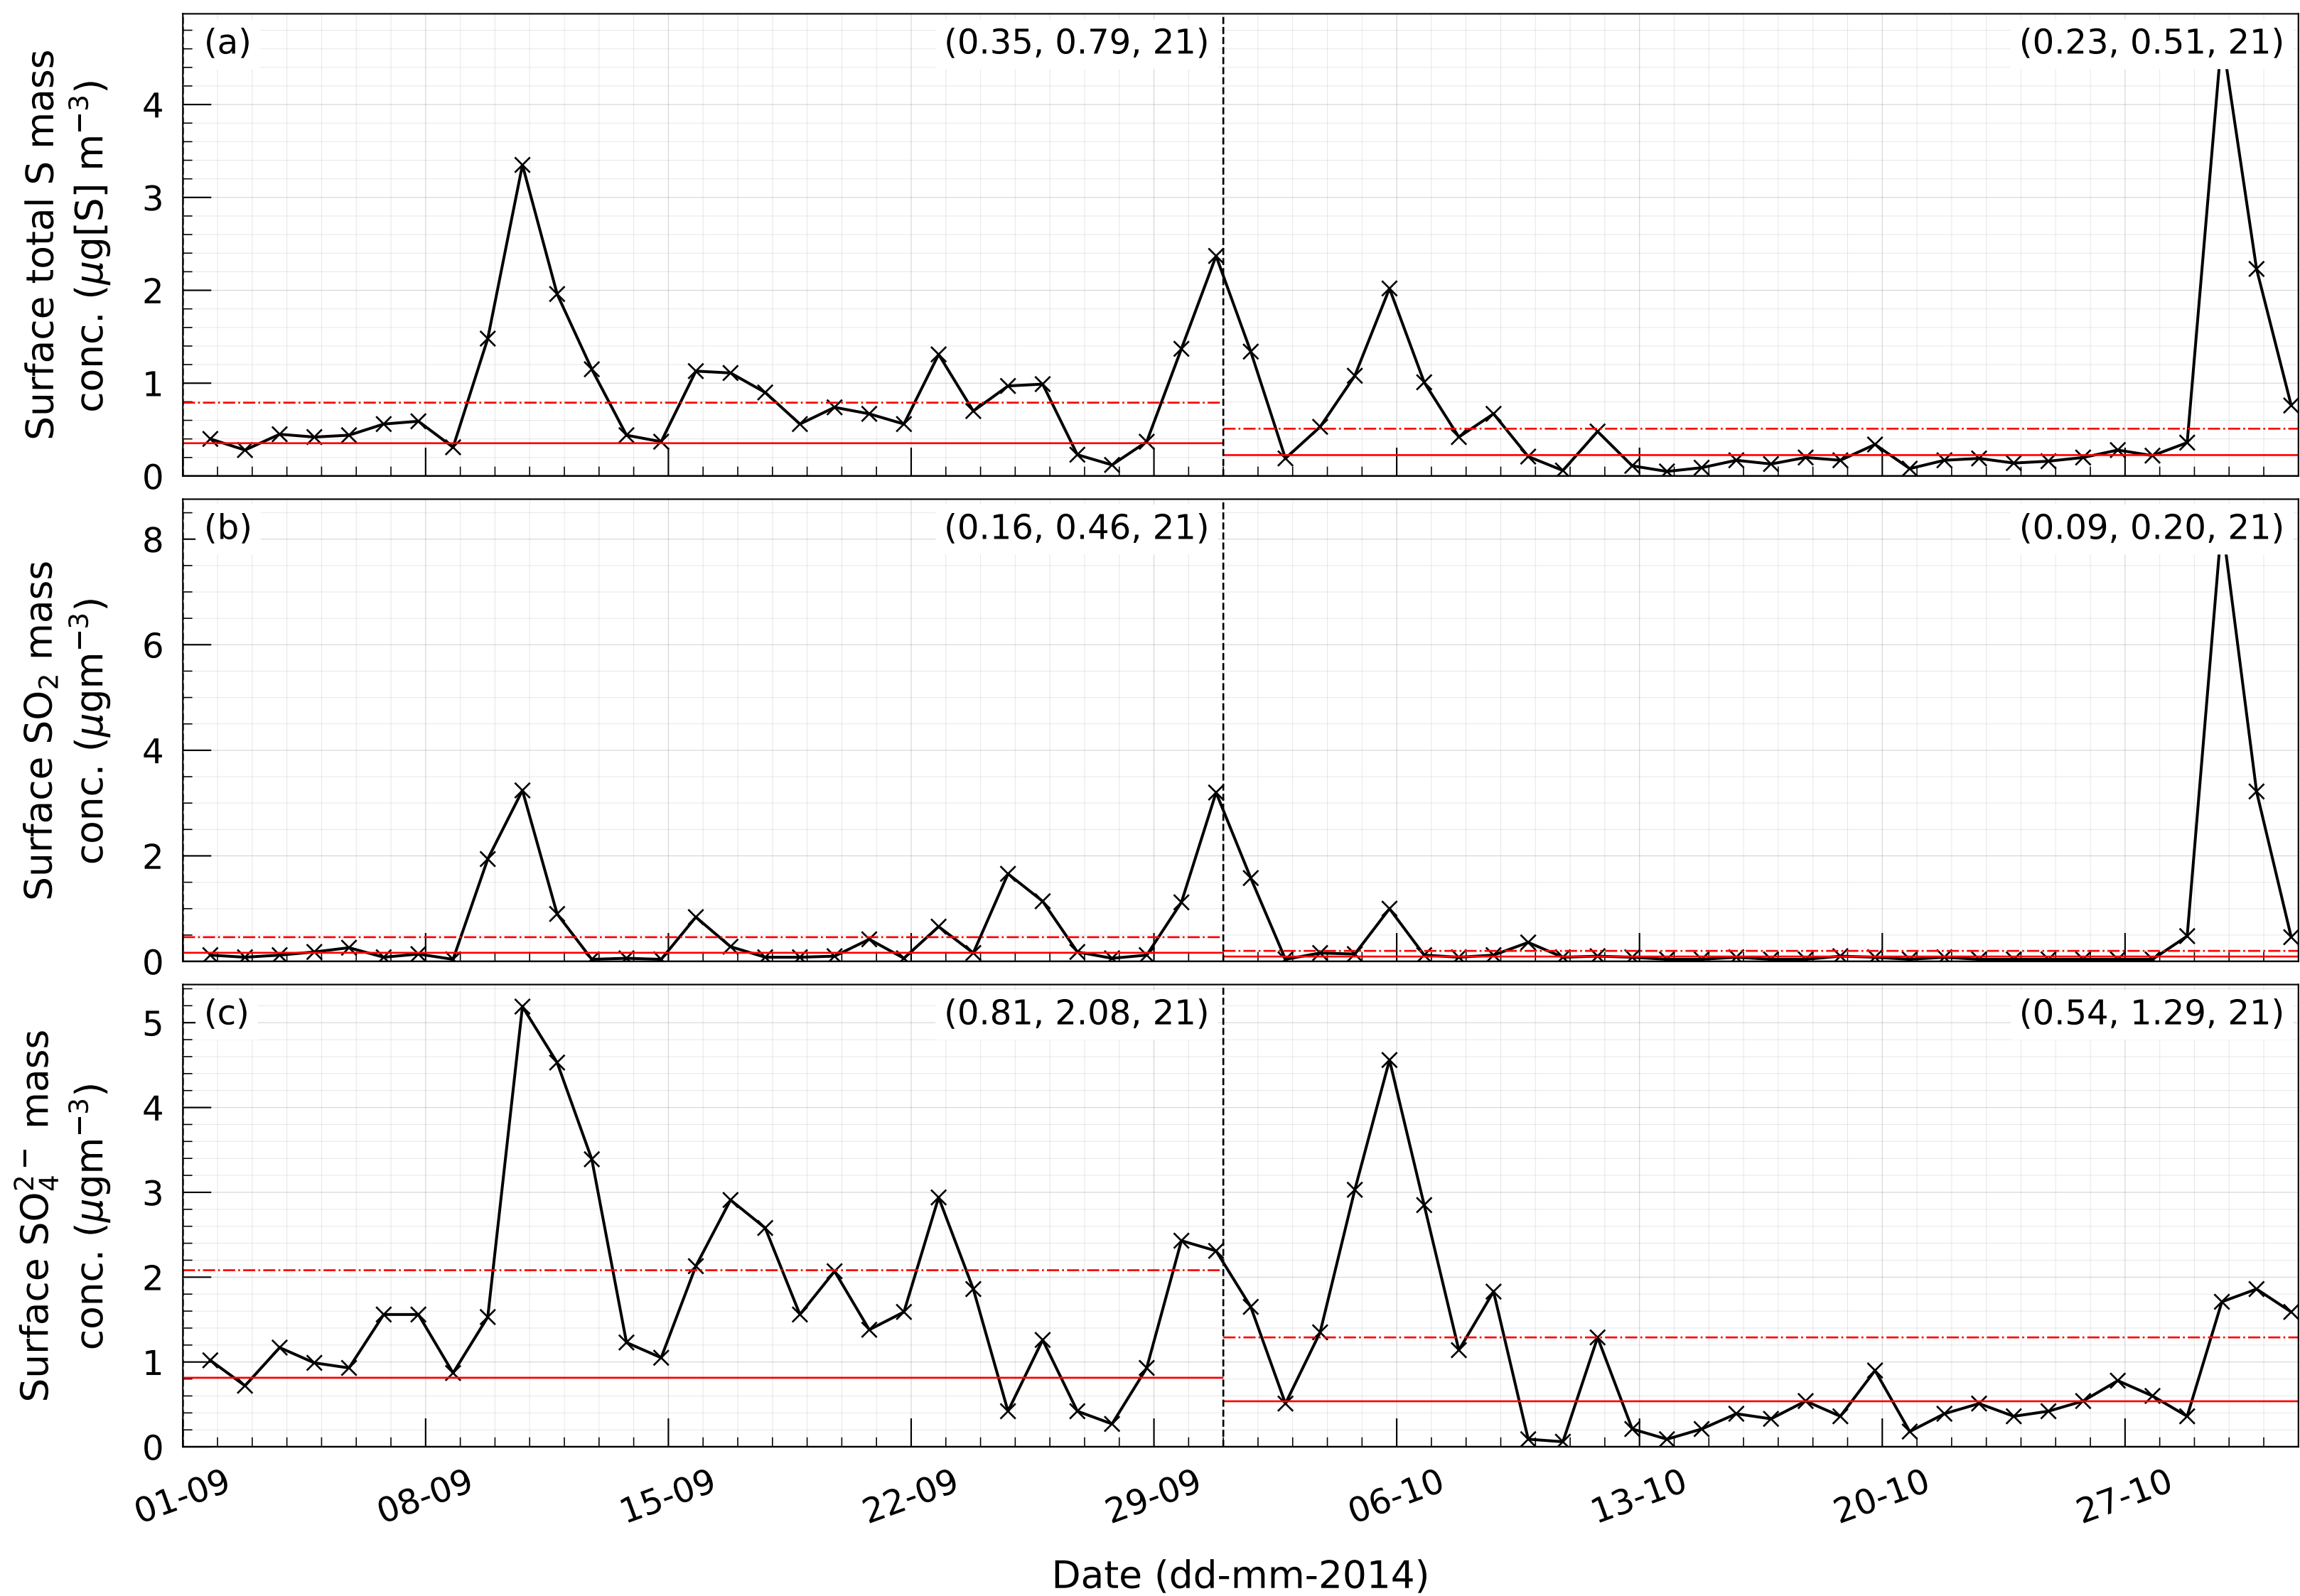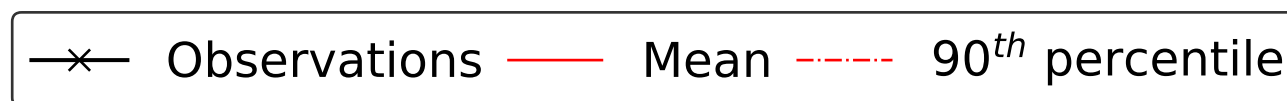

Supplement: Supplementary file 10 [file acp-24-1939-2024-supplement.zip]

# Tange

Key: (Mean, 90<sup>th</sup> pct., Months in clim.)

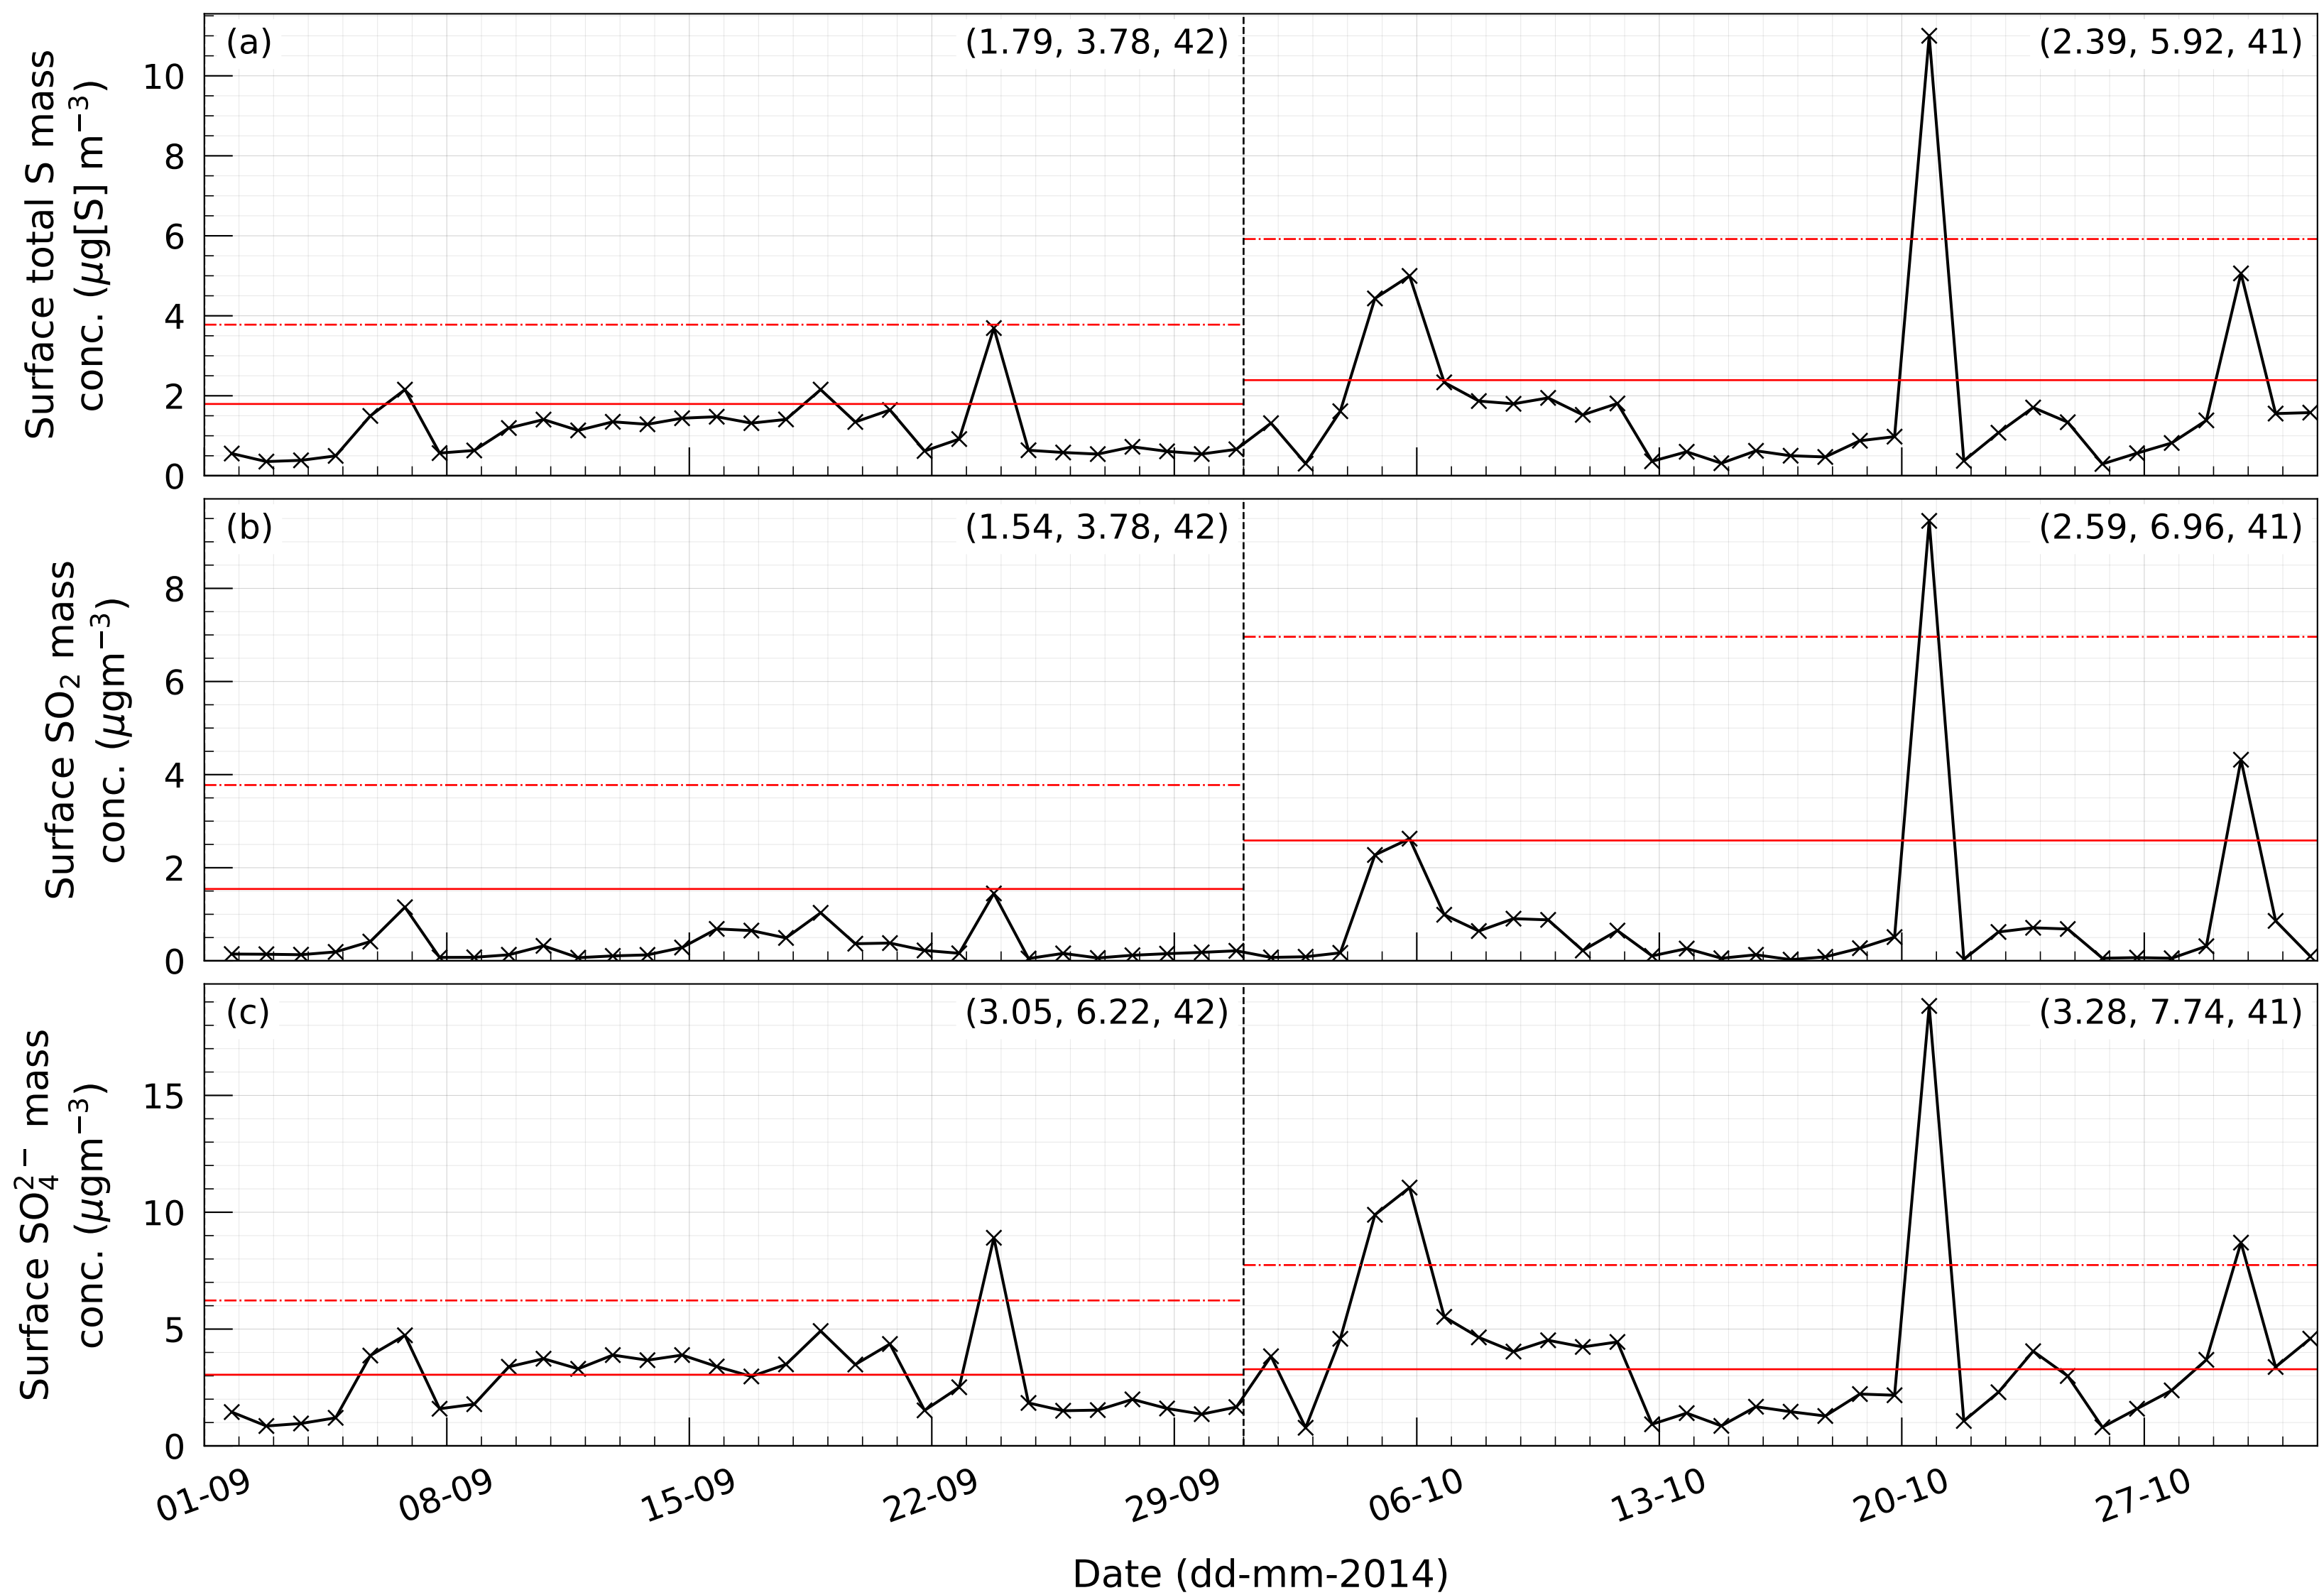

—x— Observations — Mean -.- 90<sup>th</sup> percentile

Supplement: Supplementary file 11 [file acp-24-1939-2024-supplement.zip]

# Waldhof

Key: (Mean, 90<sup>th</sup> pct., Months in clim.)

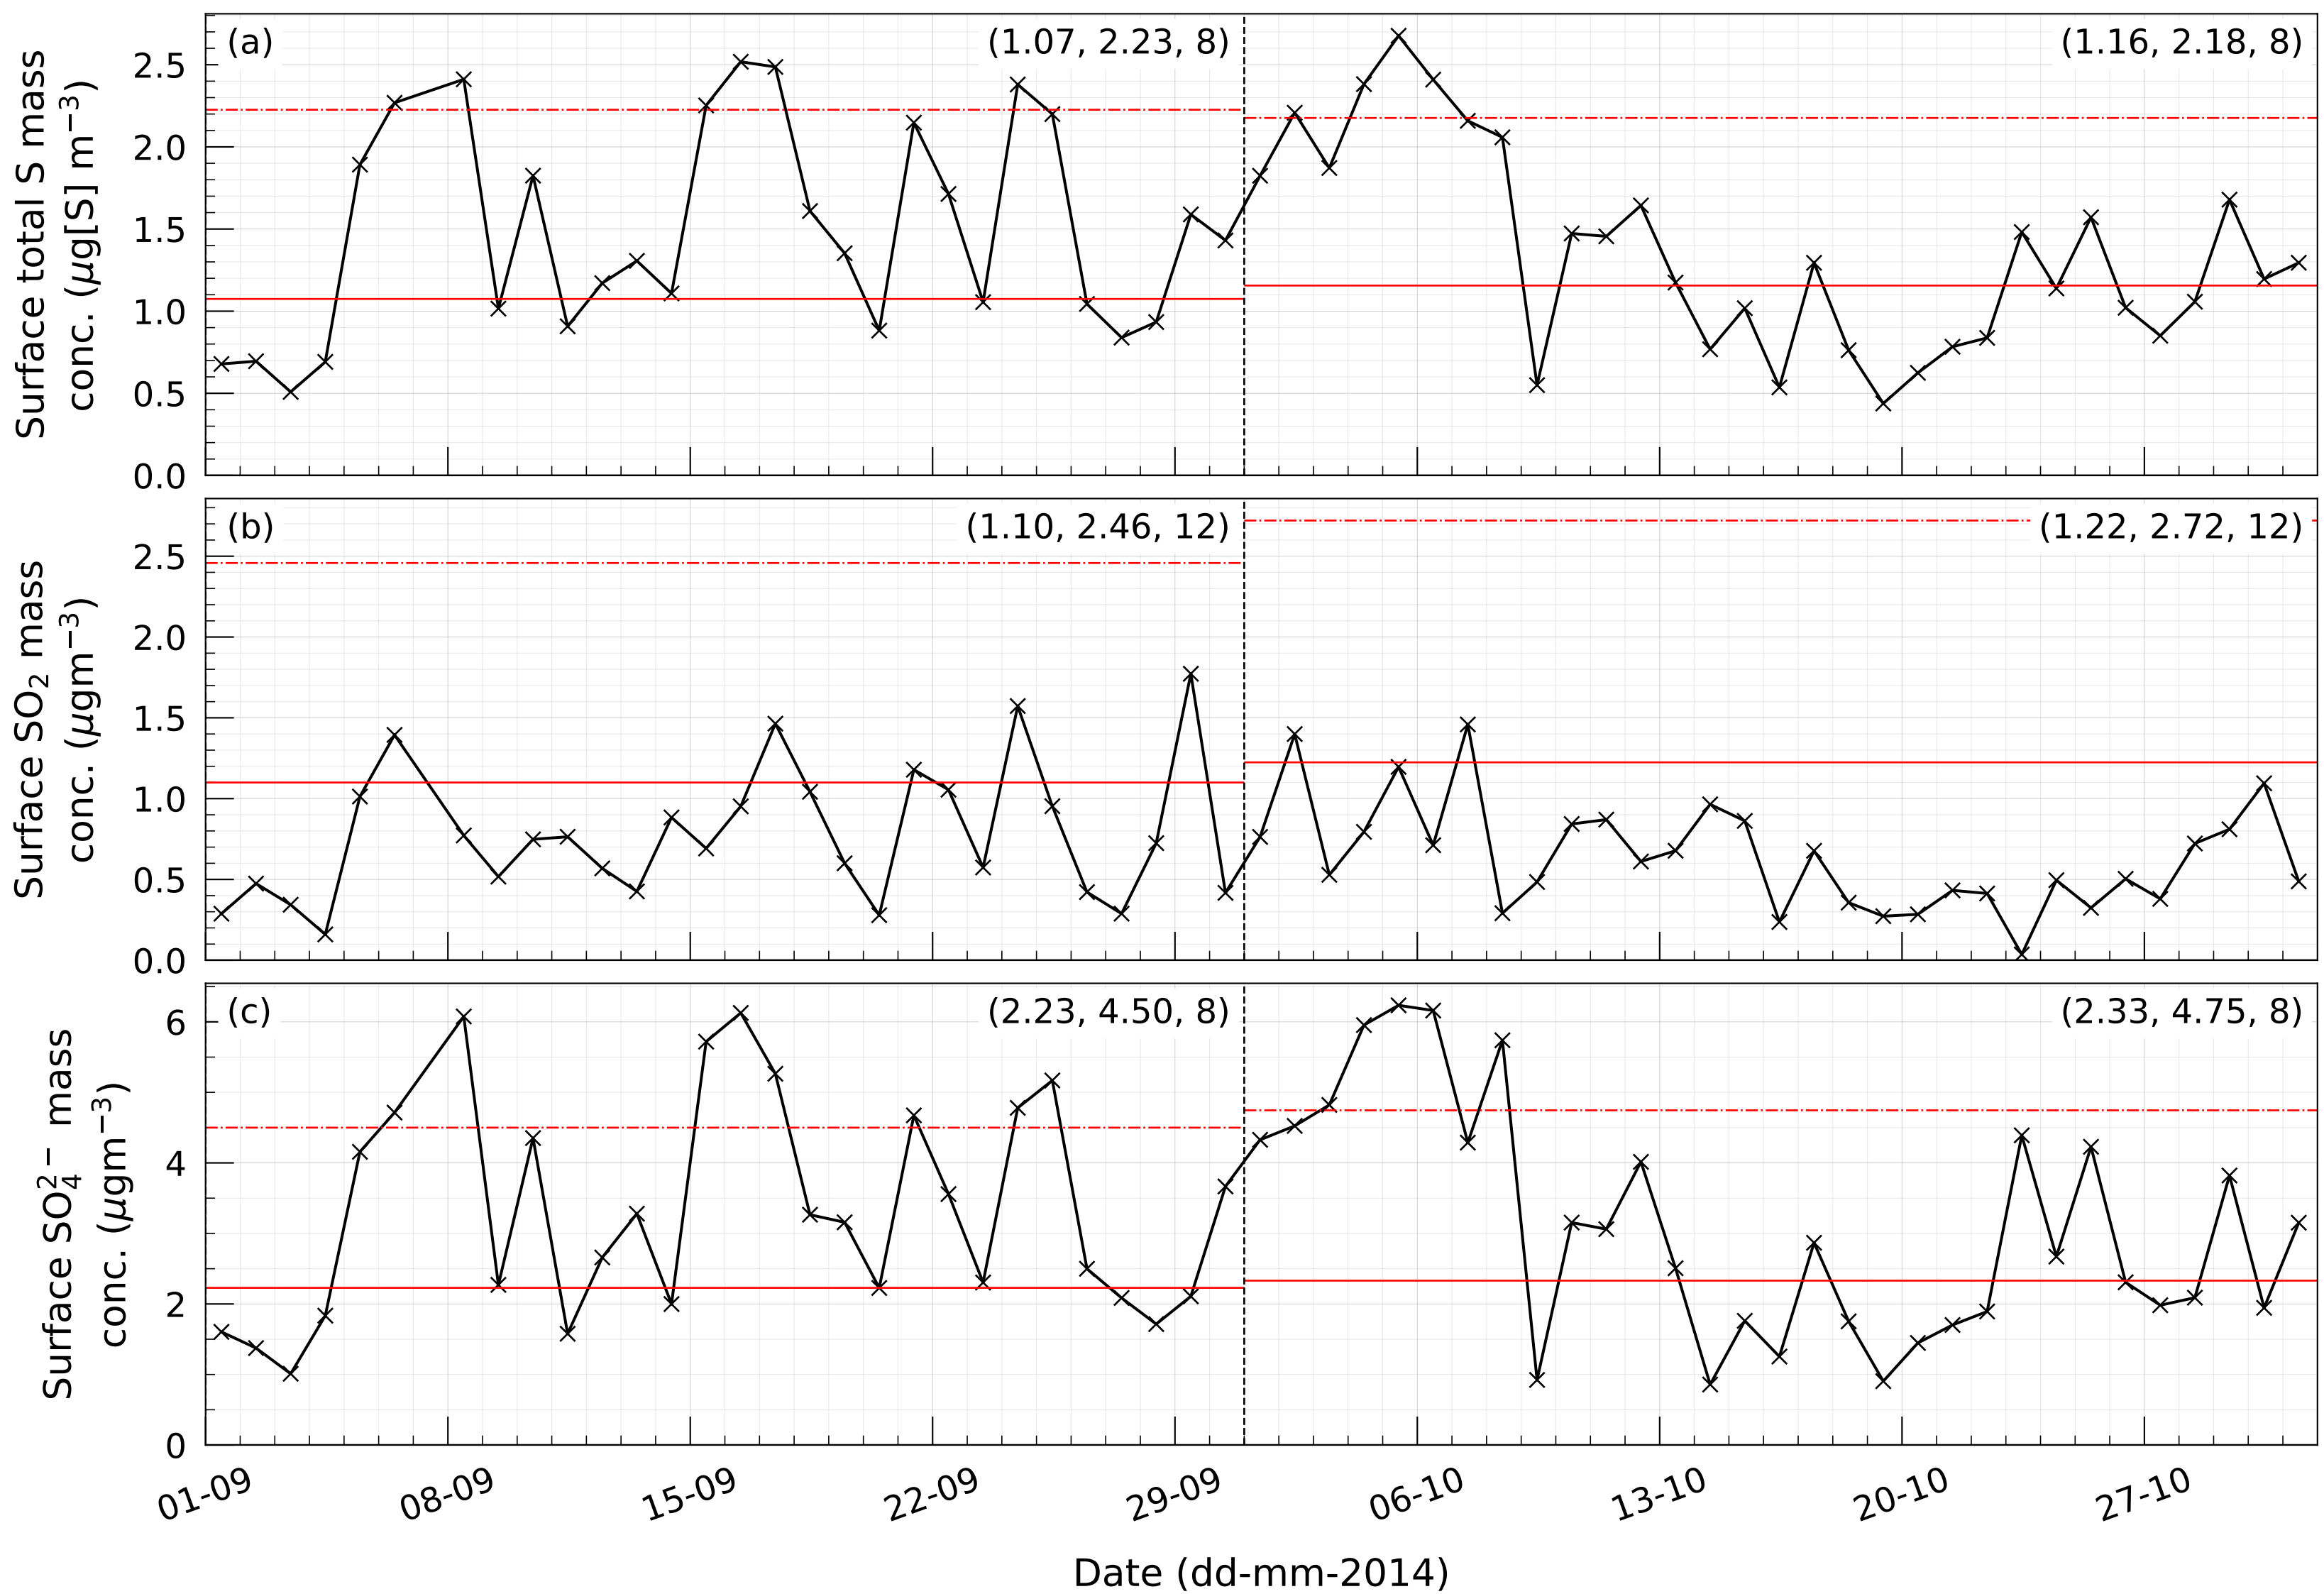

—x— Observations — Mean - - - 90<sup>th</sup> percentile

Supplement: Supplementary file 12 [file acp-24-1939-2024-supplement.zip]

# Tustervatn

Key: (Mean, 90<sup>th</sup> pct., Months in clim.)

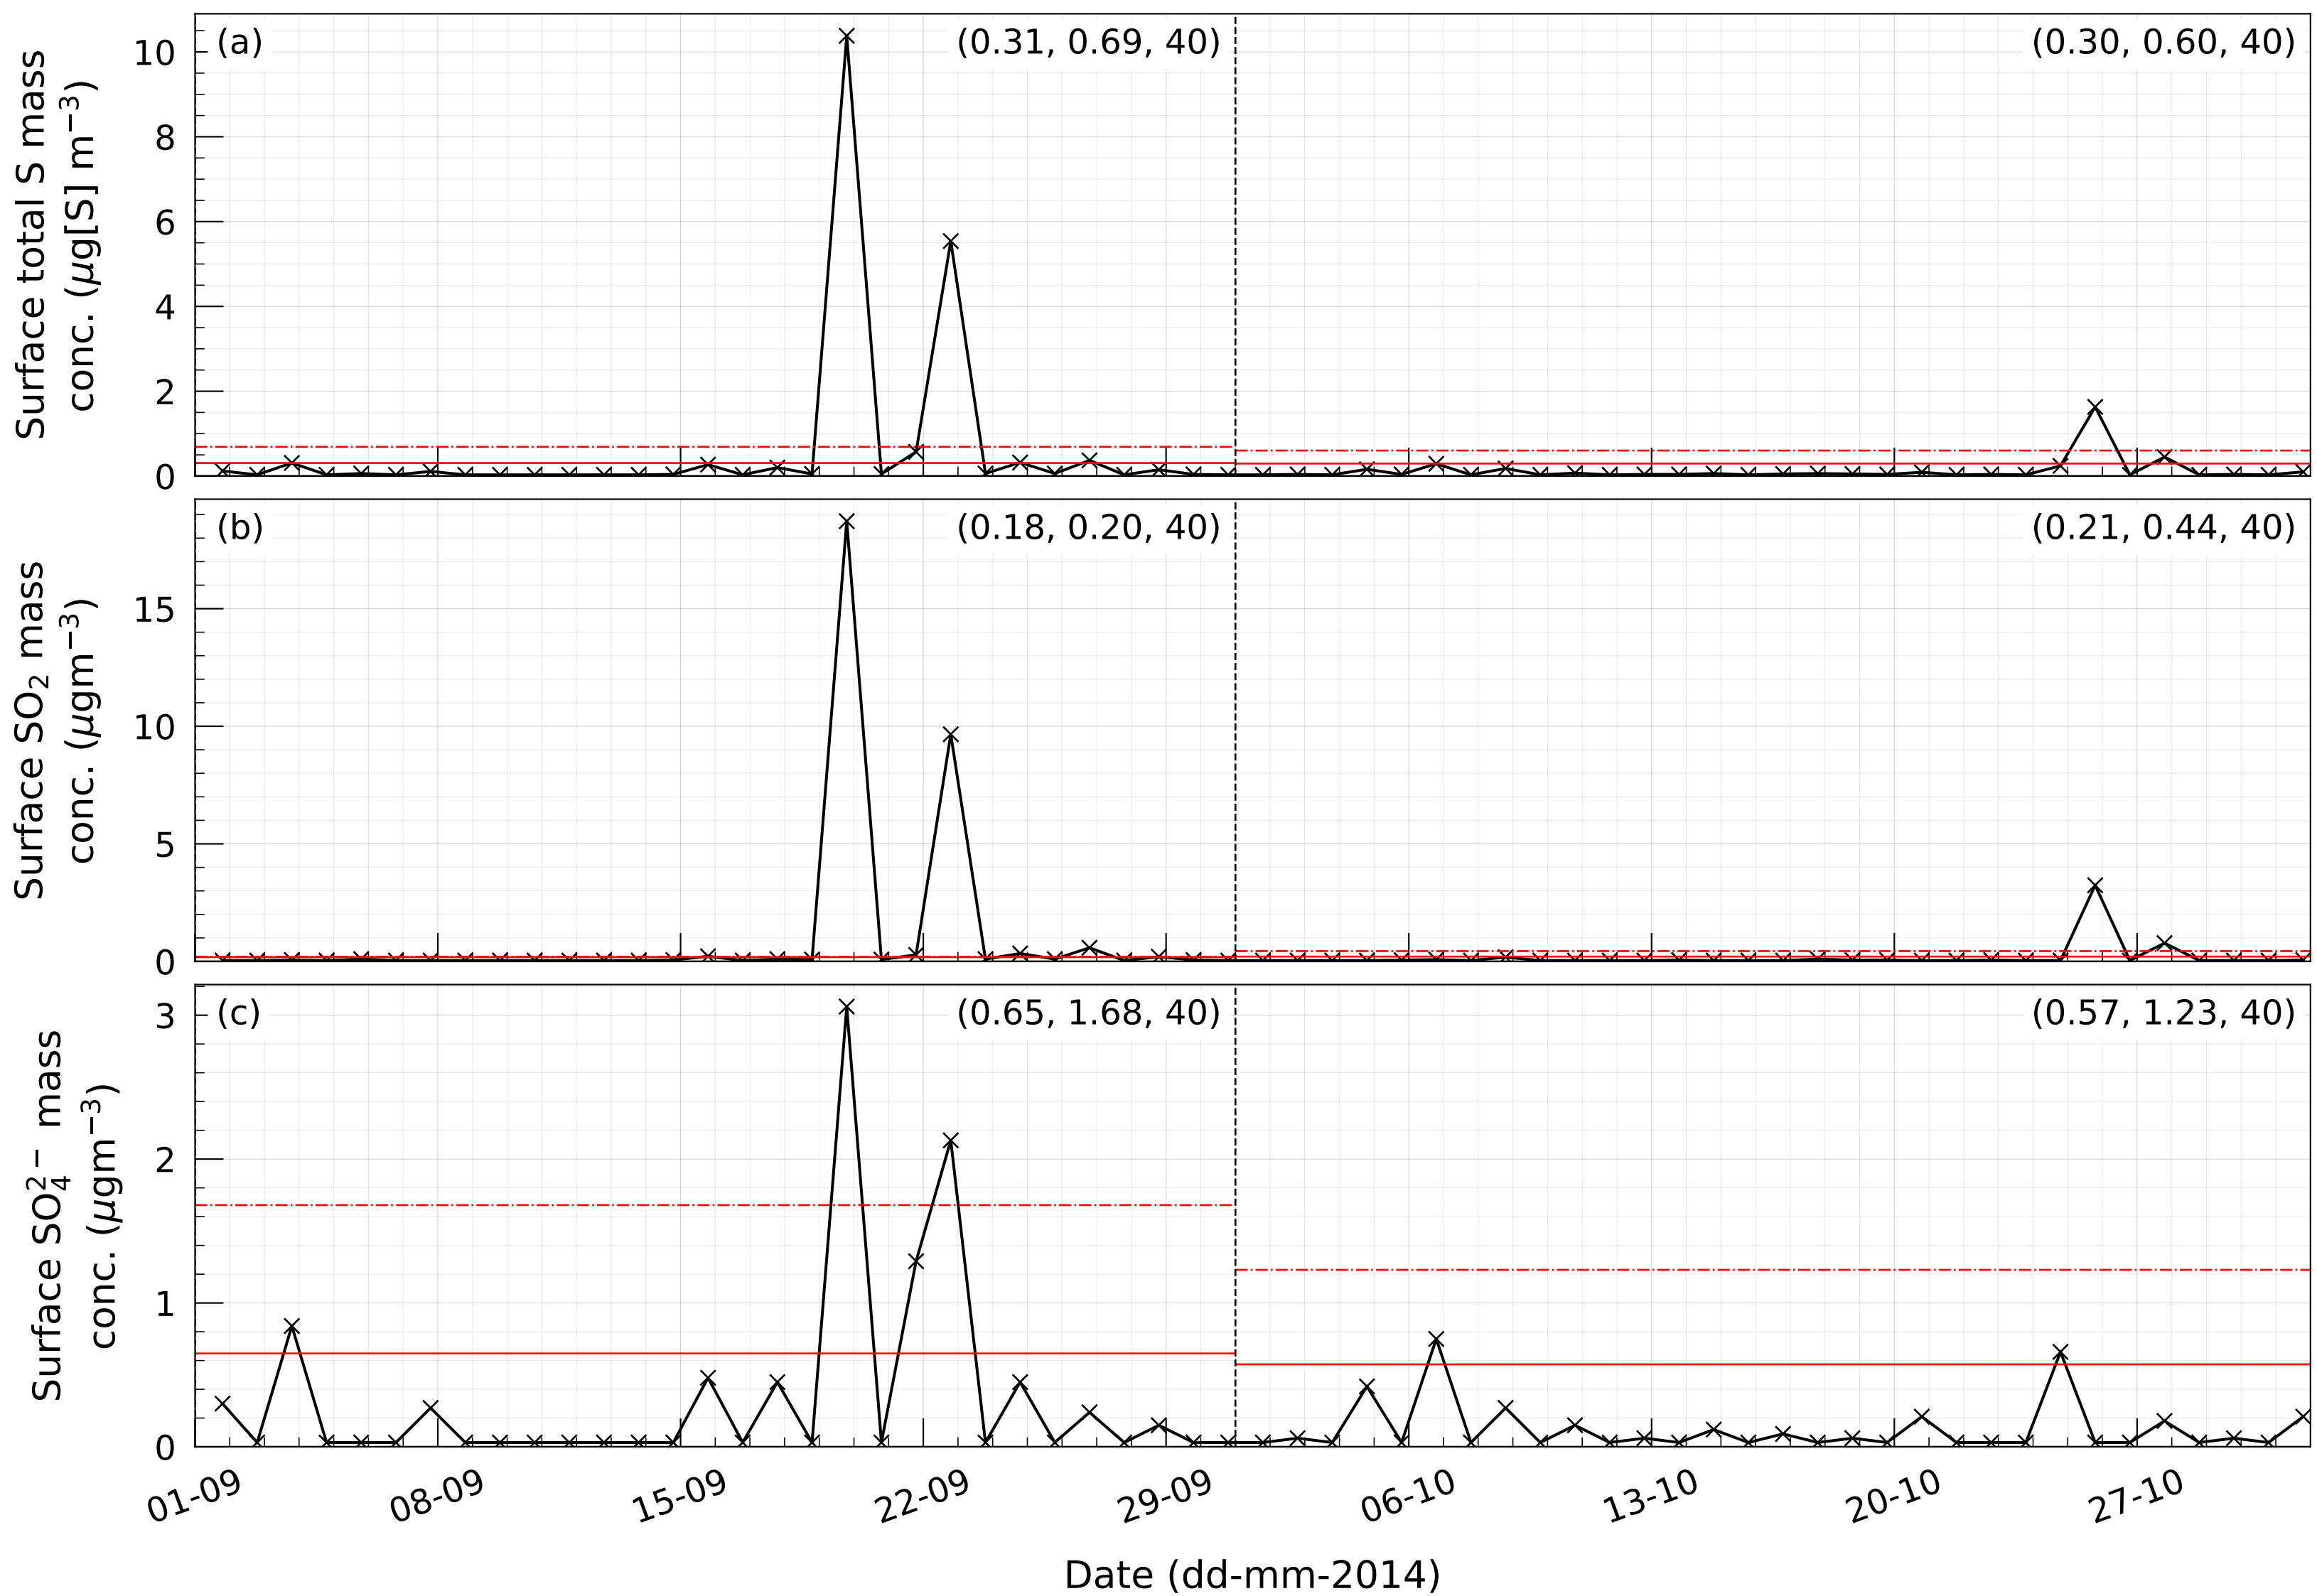

—x— Observations — Mean - - - 90<sup>th</sup> percentile

Supplement: Supplementary file 13 [file acp-24-1939-2024-supplement.zip]

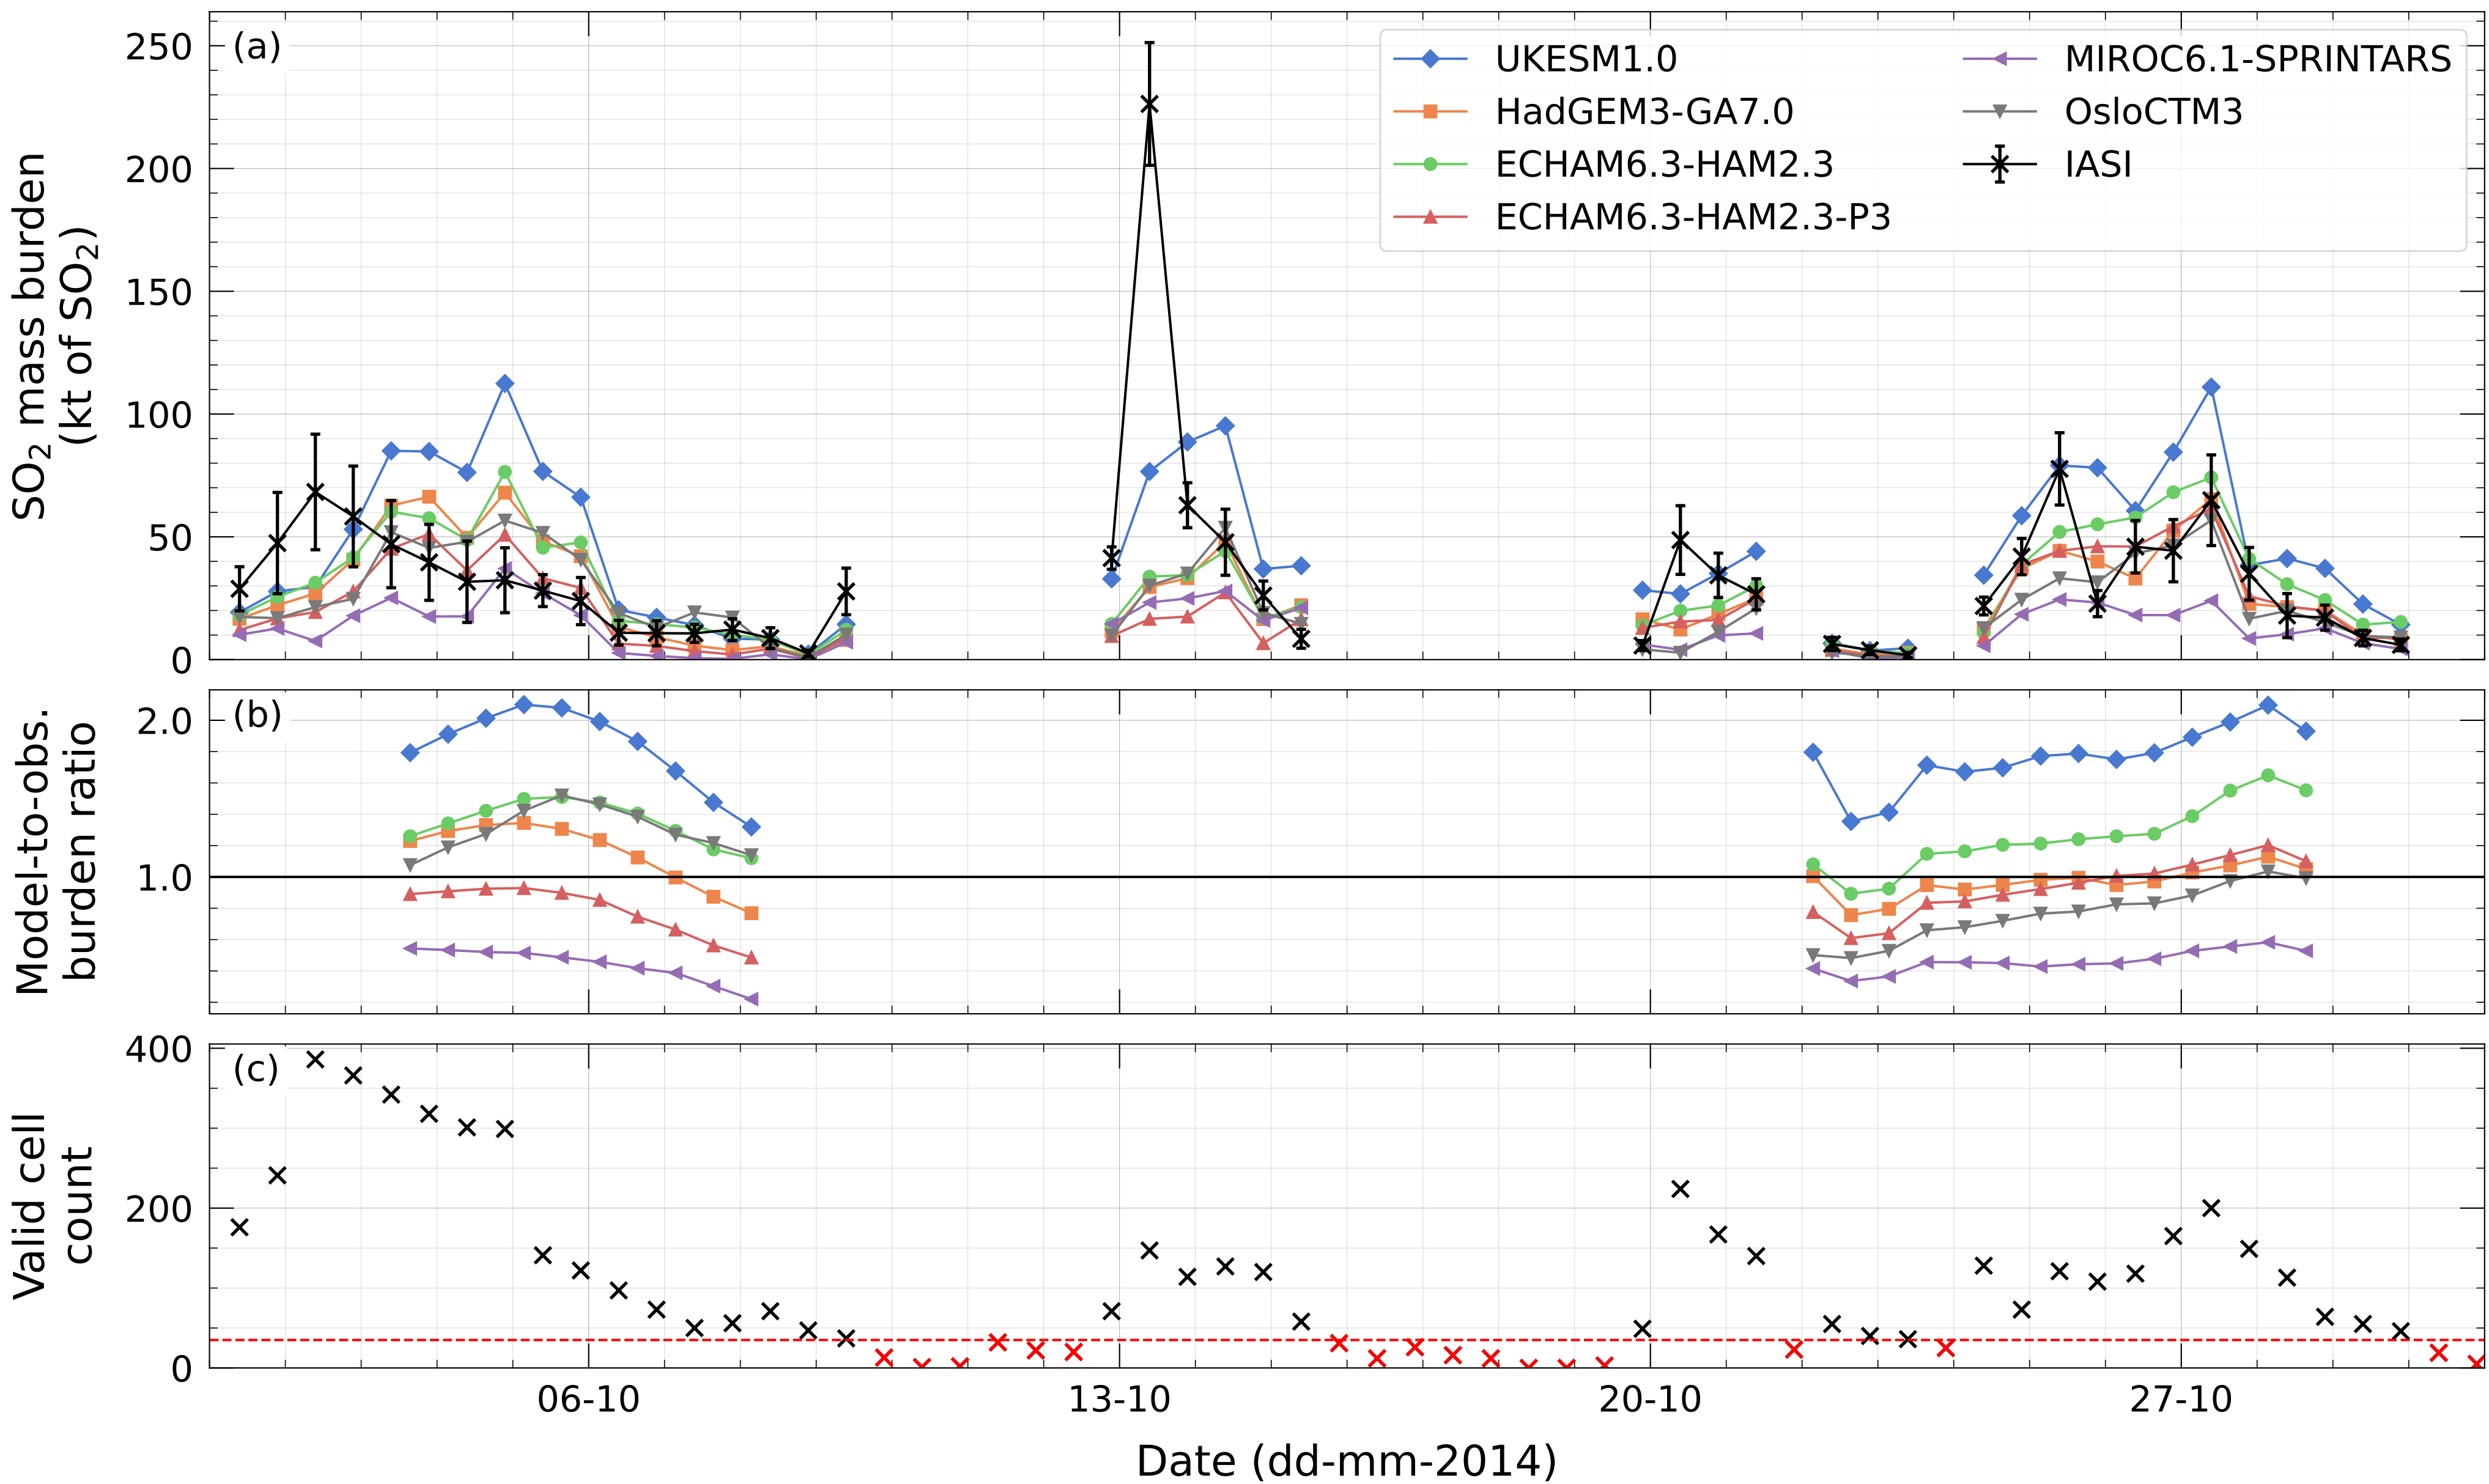

Supplement: Supplementary file 14 [file acp-24-1939-2024-supplement.zip]

Key: (Mean, 90<sup>th</sup> pct., Months in clim.)

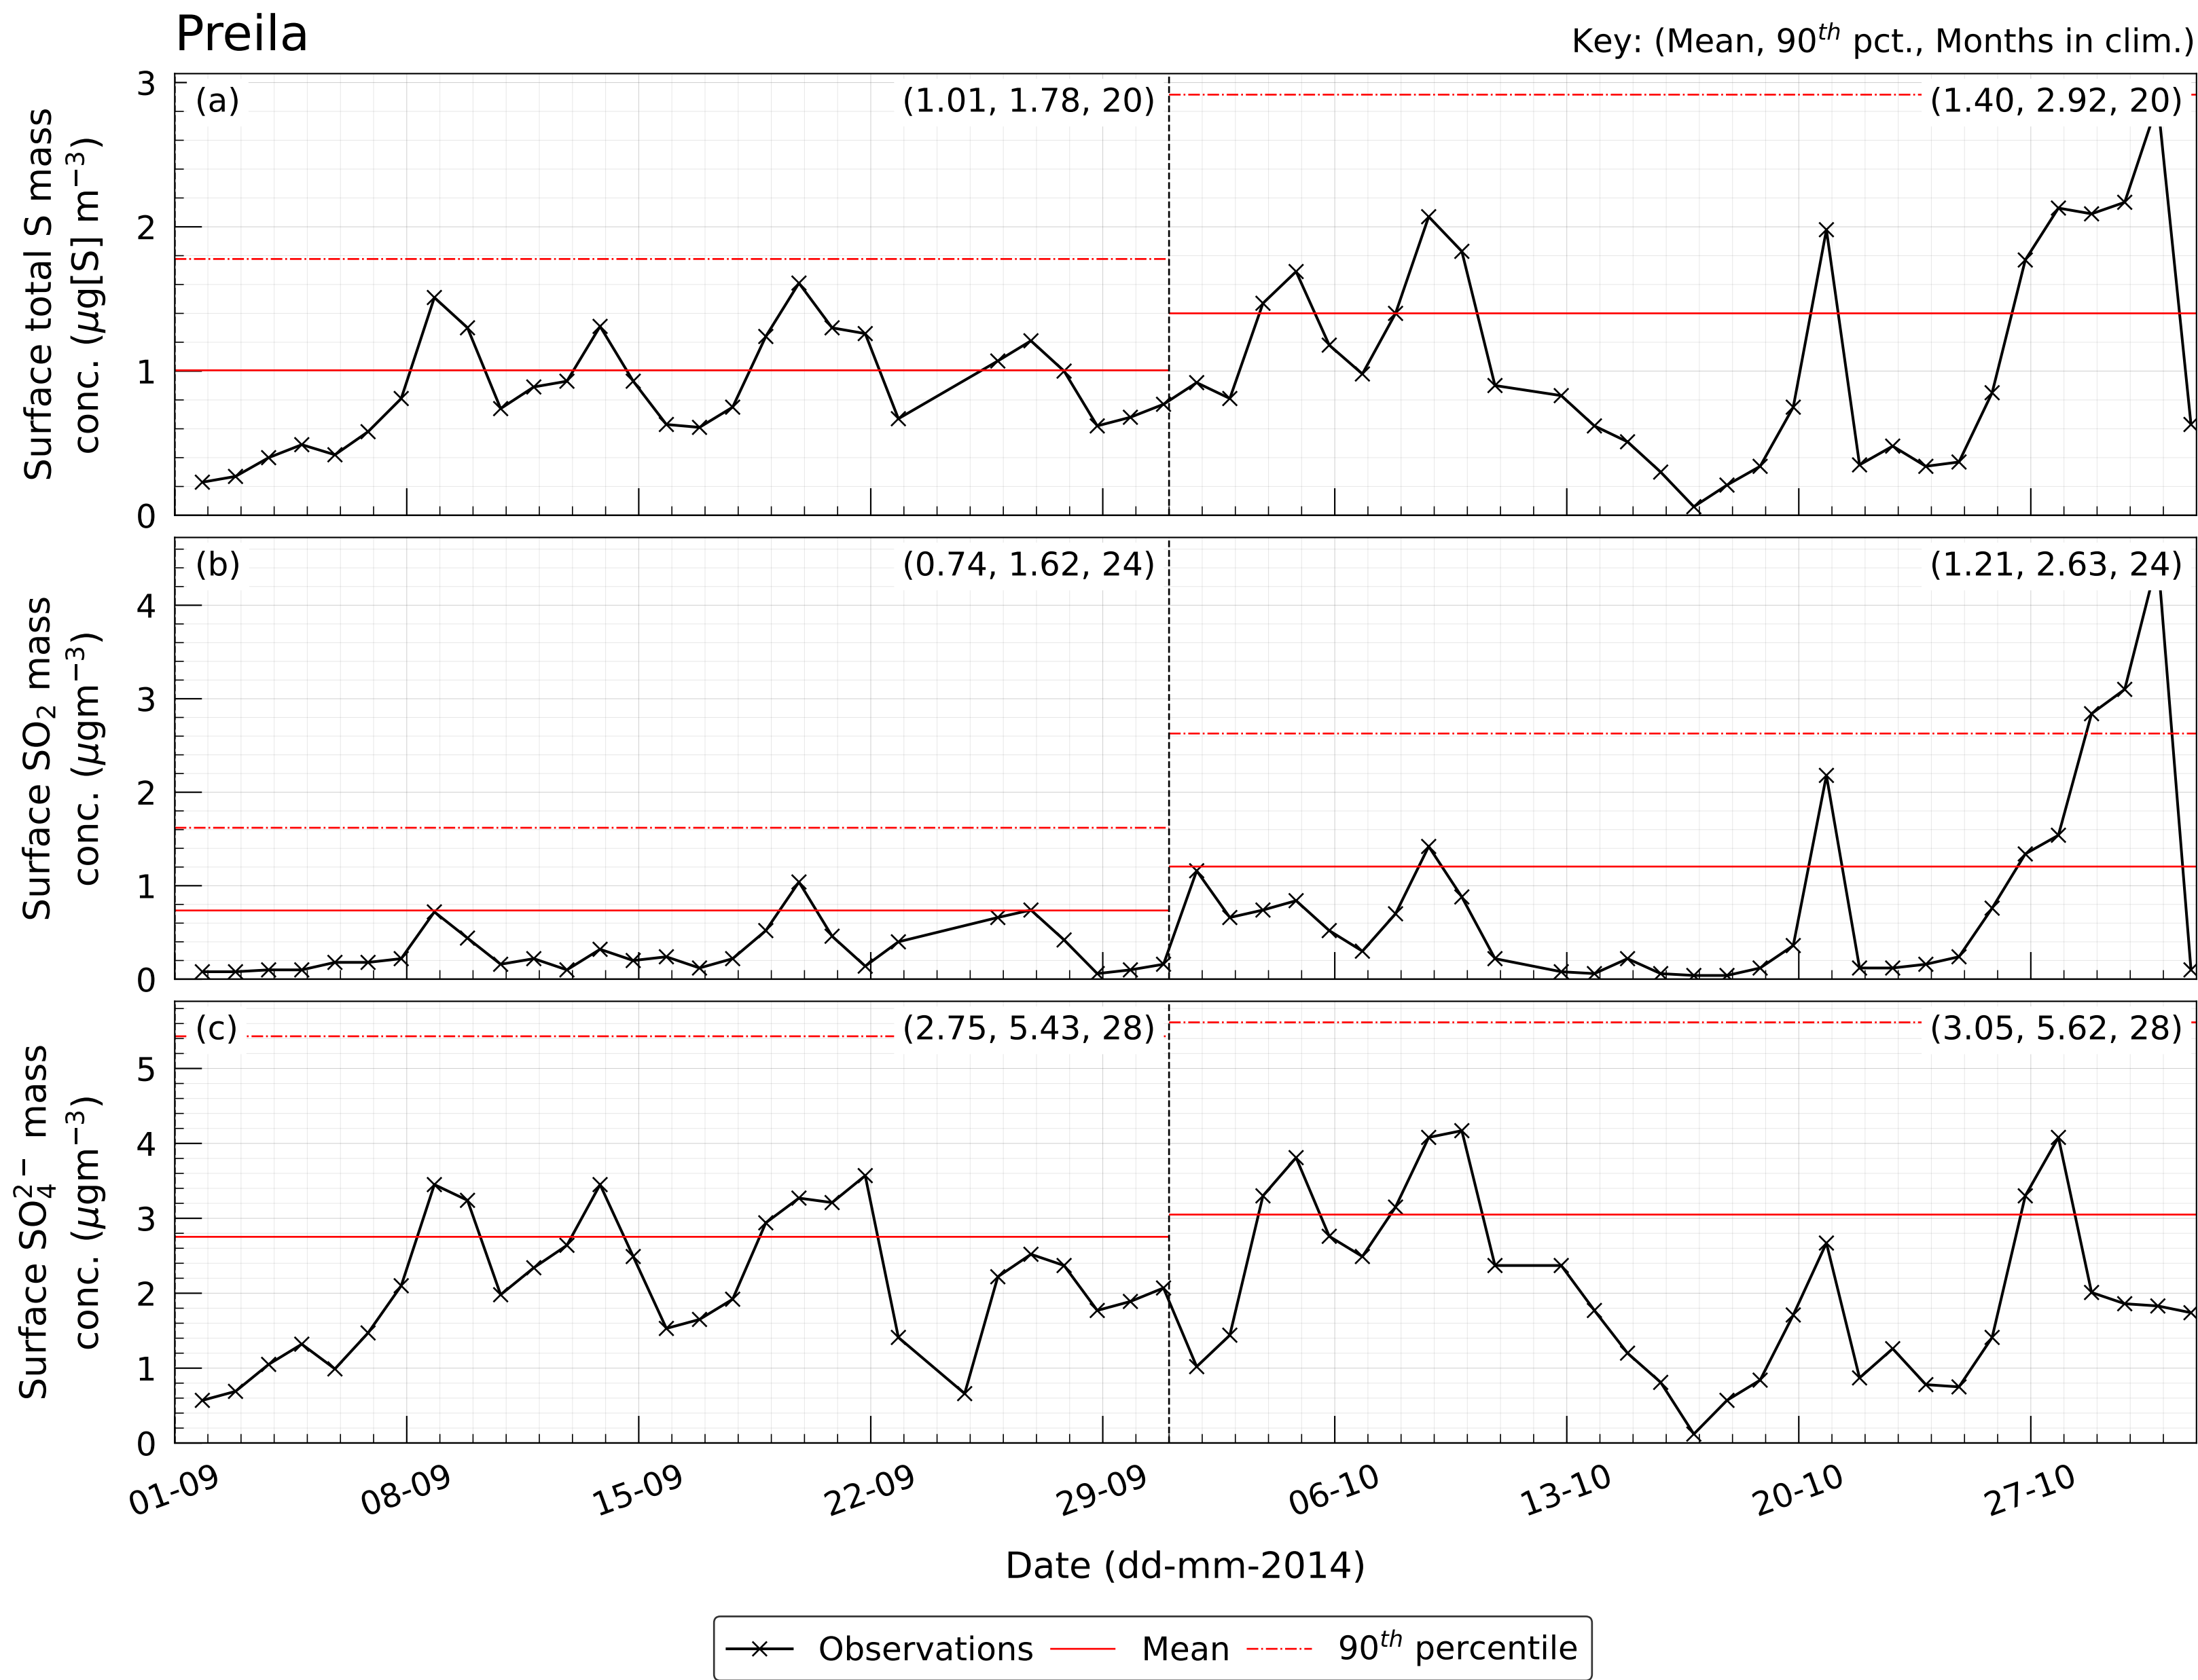

Supplement: Supplementary file 15 [file acp-24-1939-2024-supplement.zip]

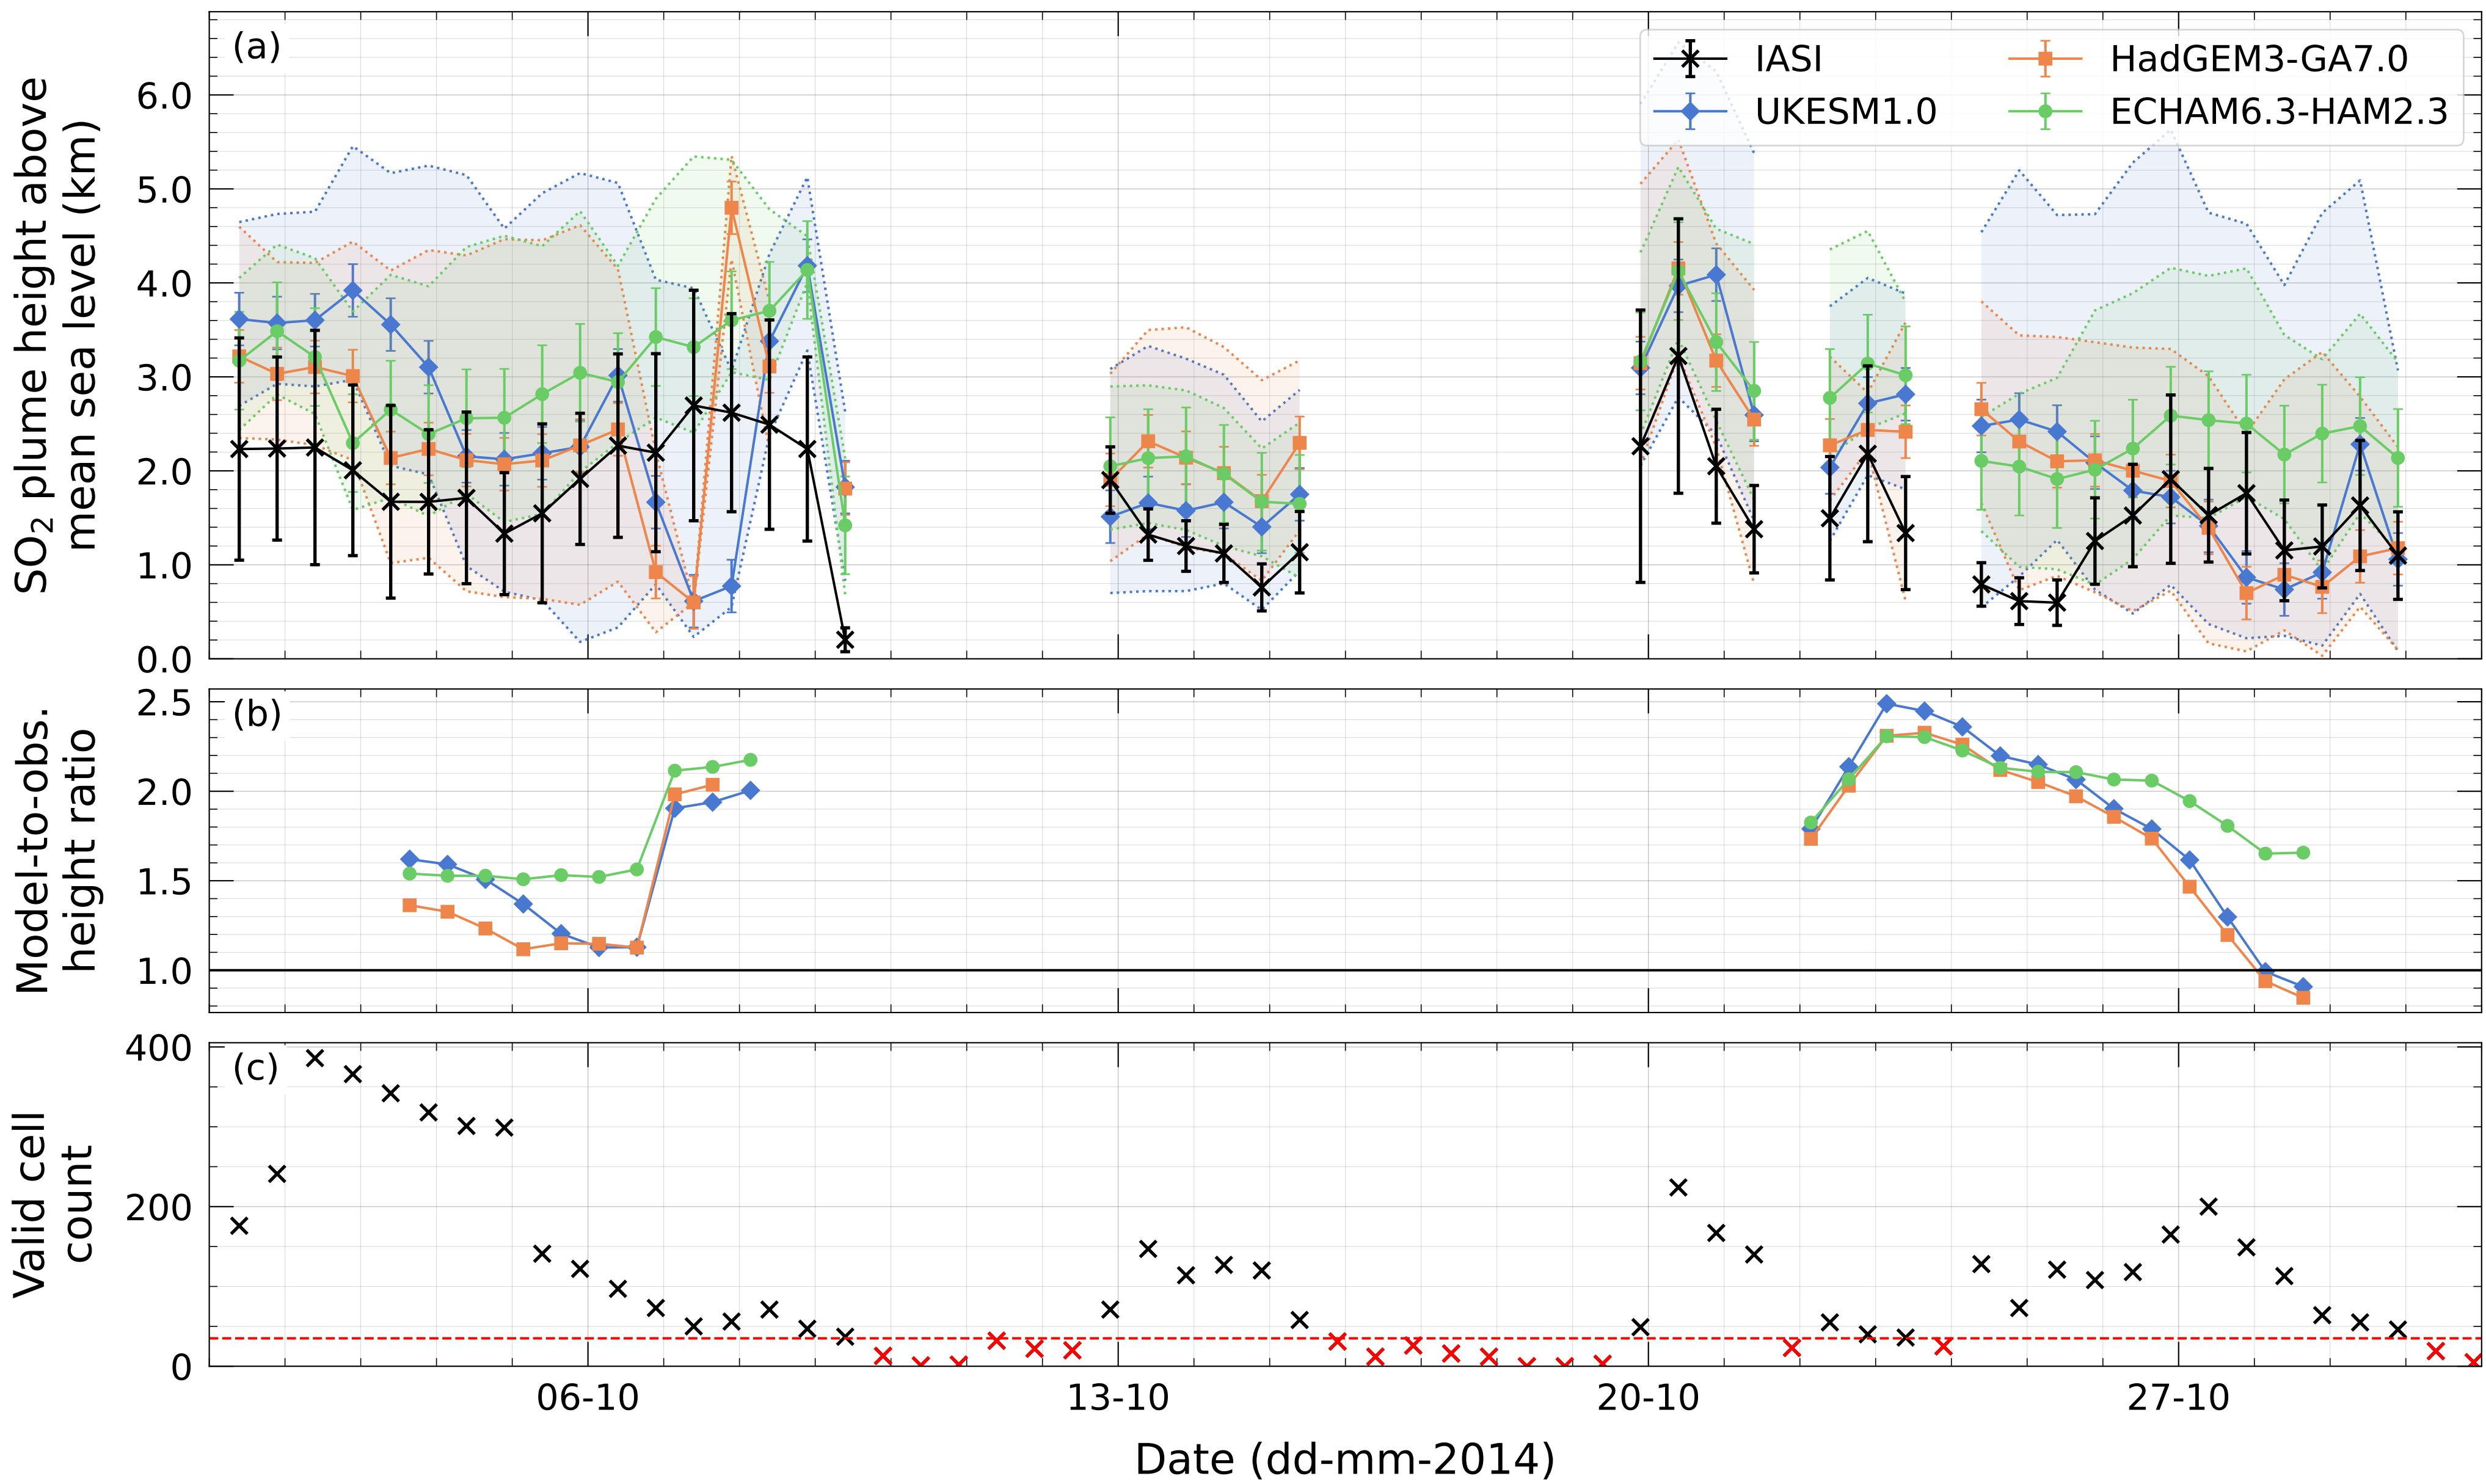

Supplement: Supplementary file 16 [file acp-24-1939-2024-supplement.zip]

# Auchencorth-moss

Key: (Mean, 90<sup>th</sup> pct., Months in clim.)

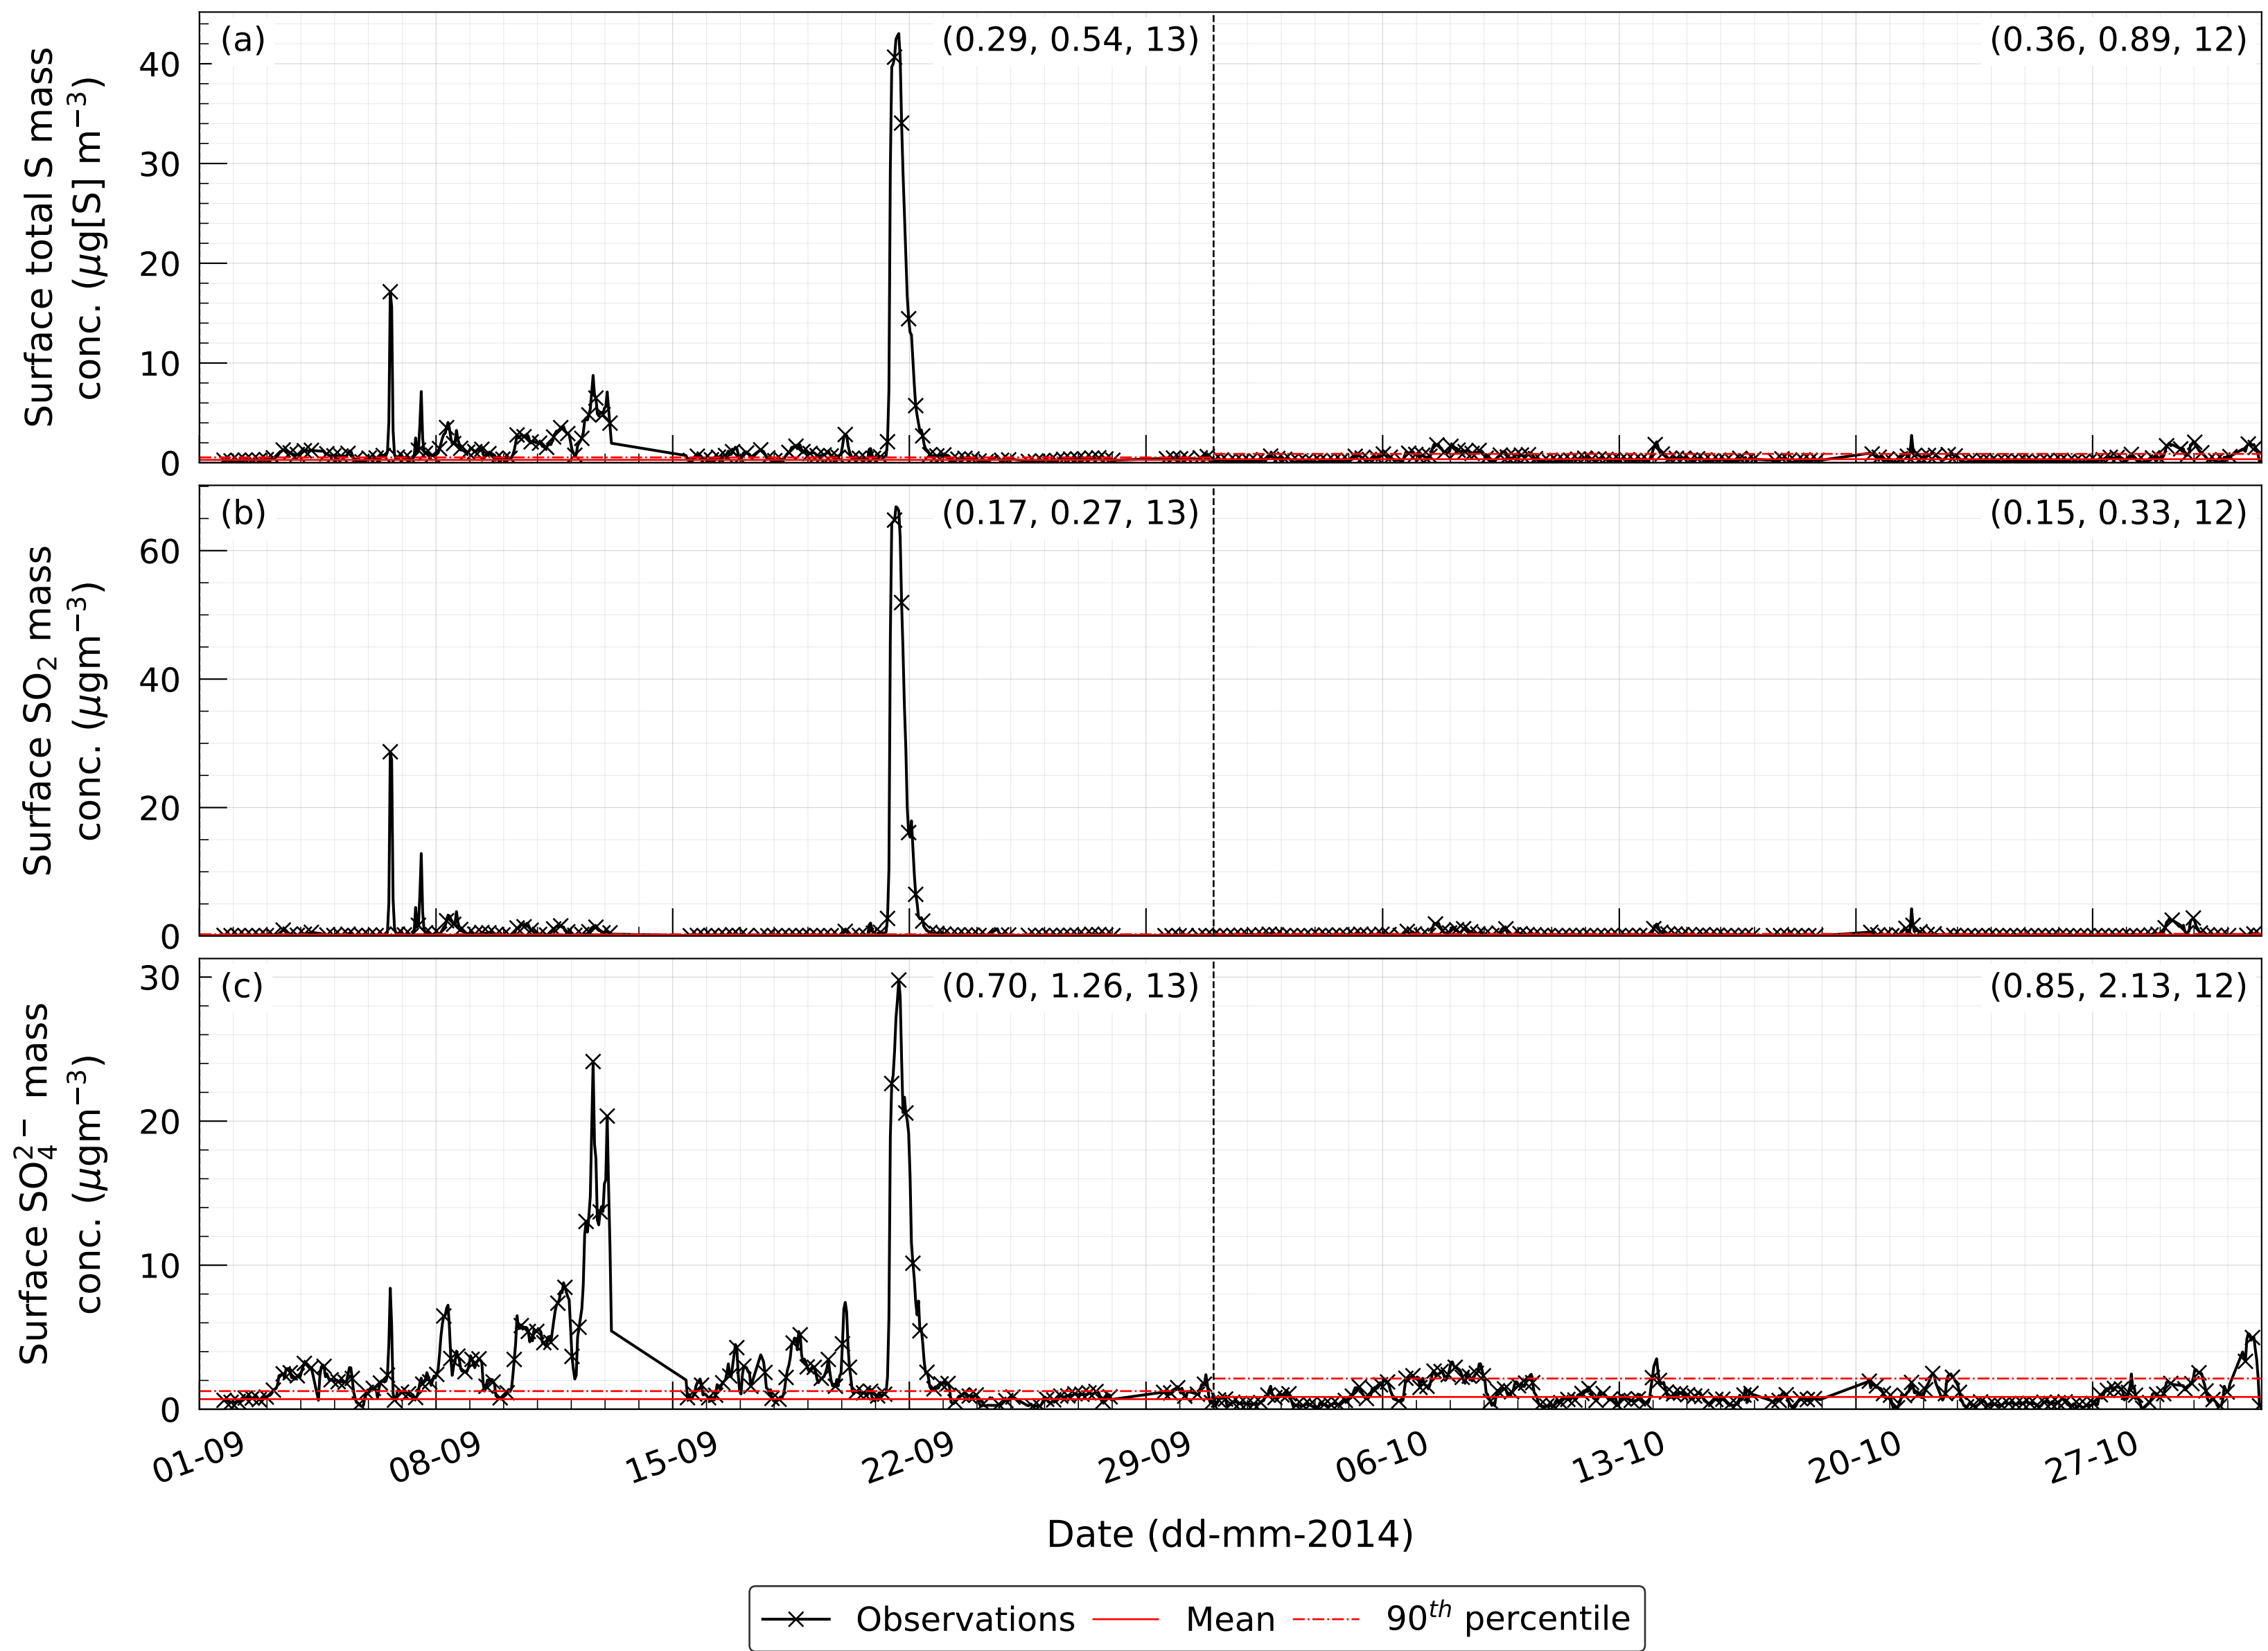

Supplement: Supplementary file 18 [file acp-24-1939-2024-supplement.zip]

Key: (Mean, 90<sup>th</sup> pct., Months in clim.)

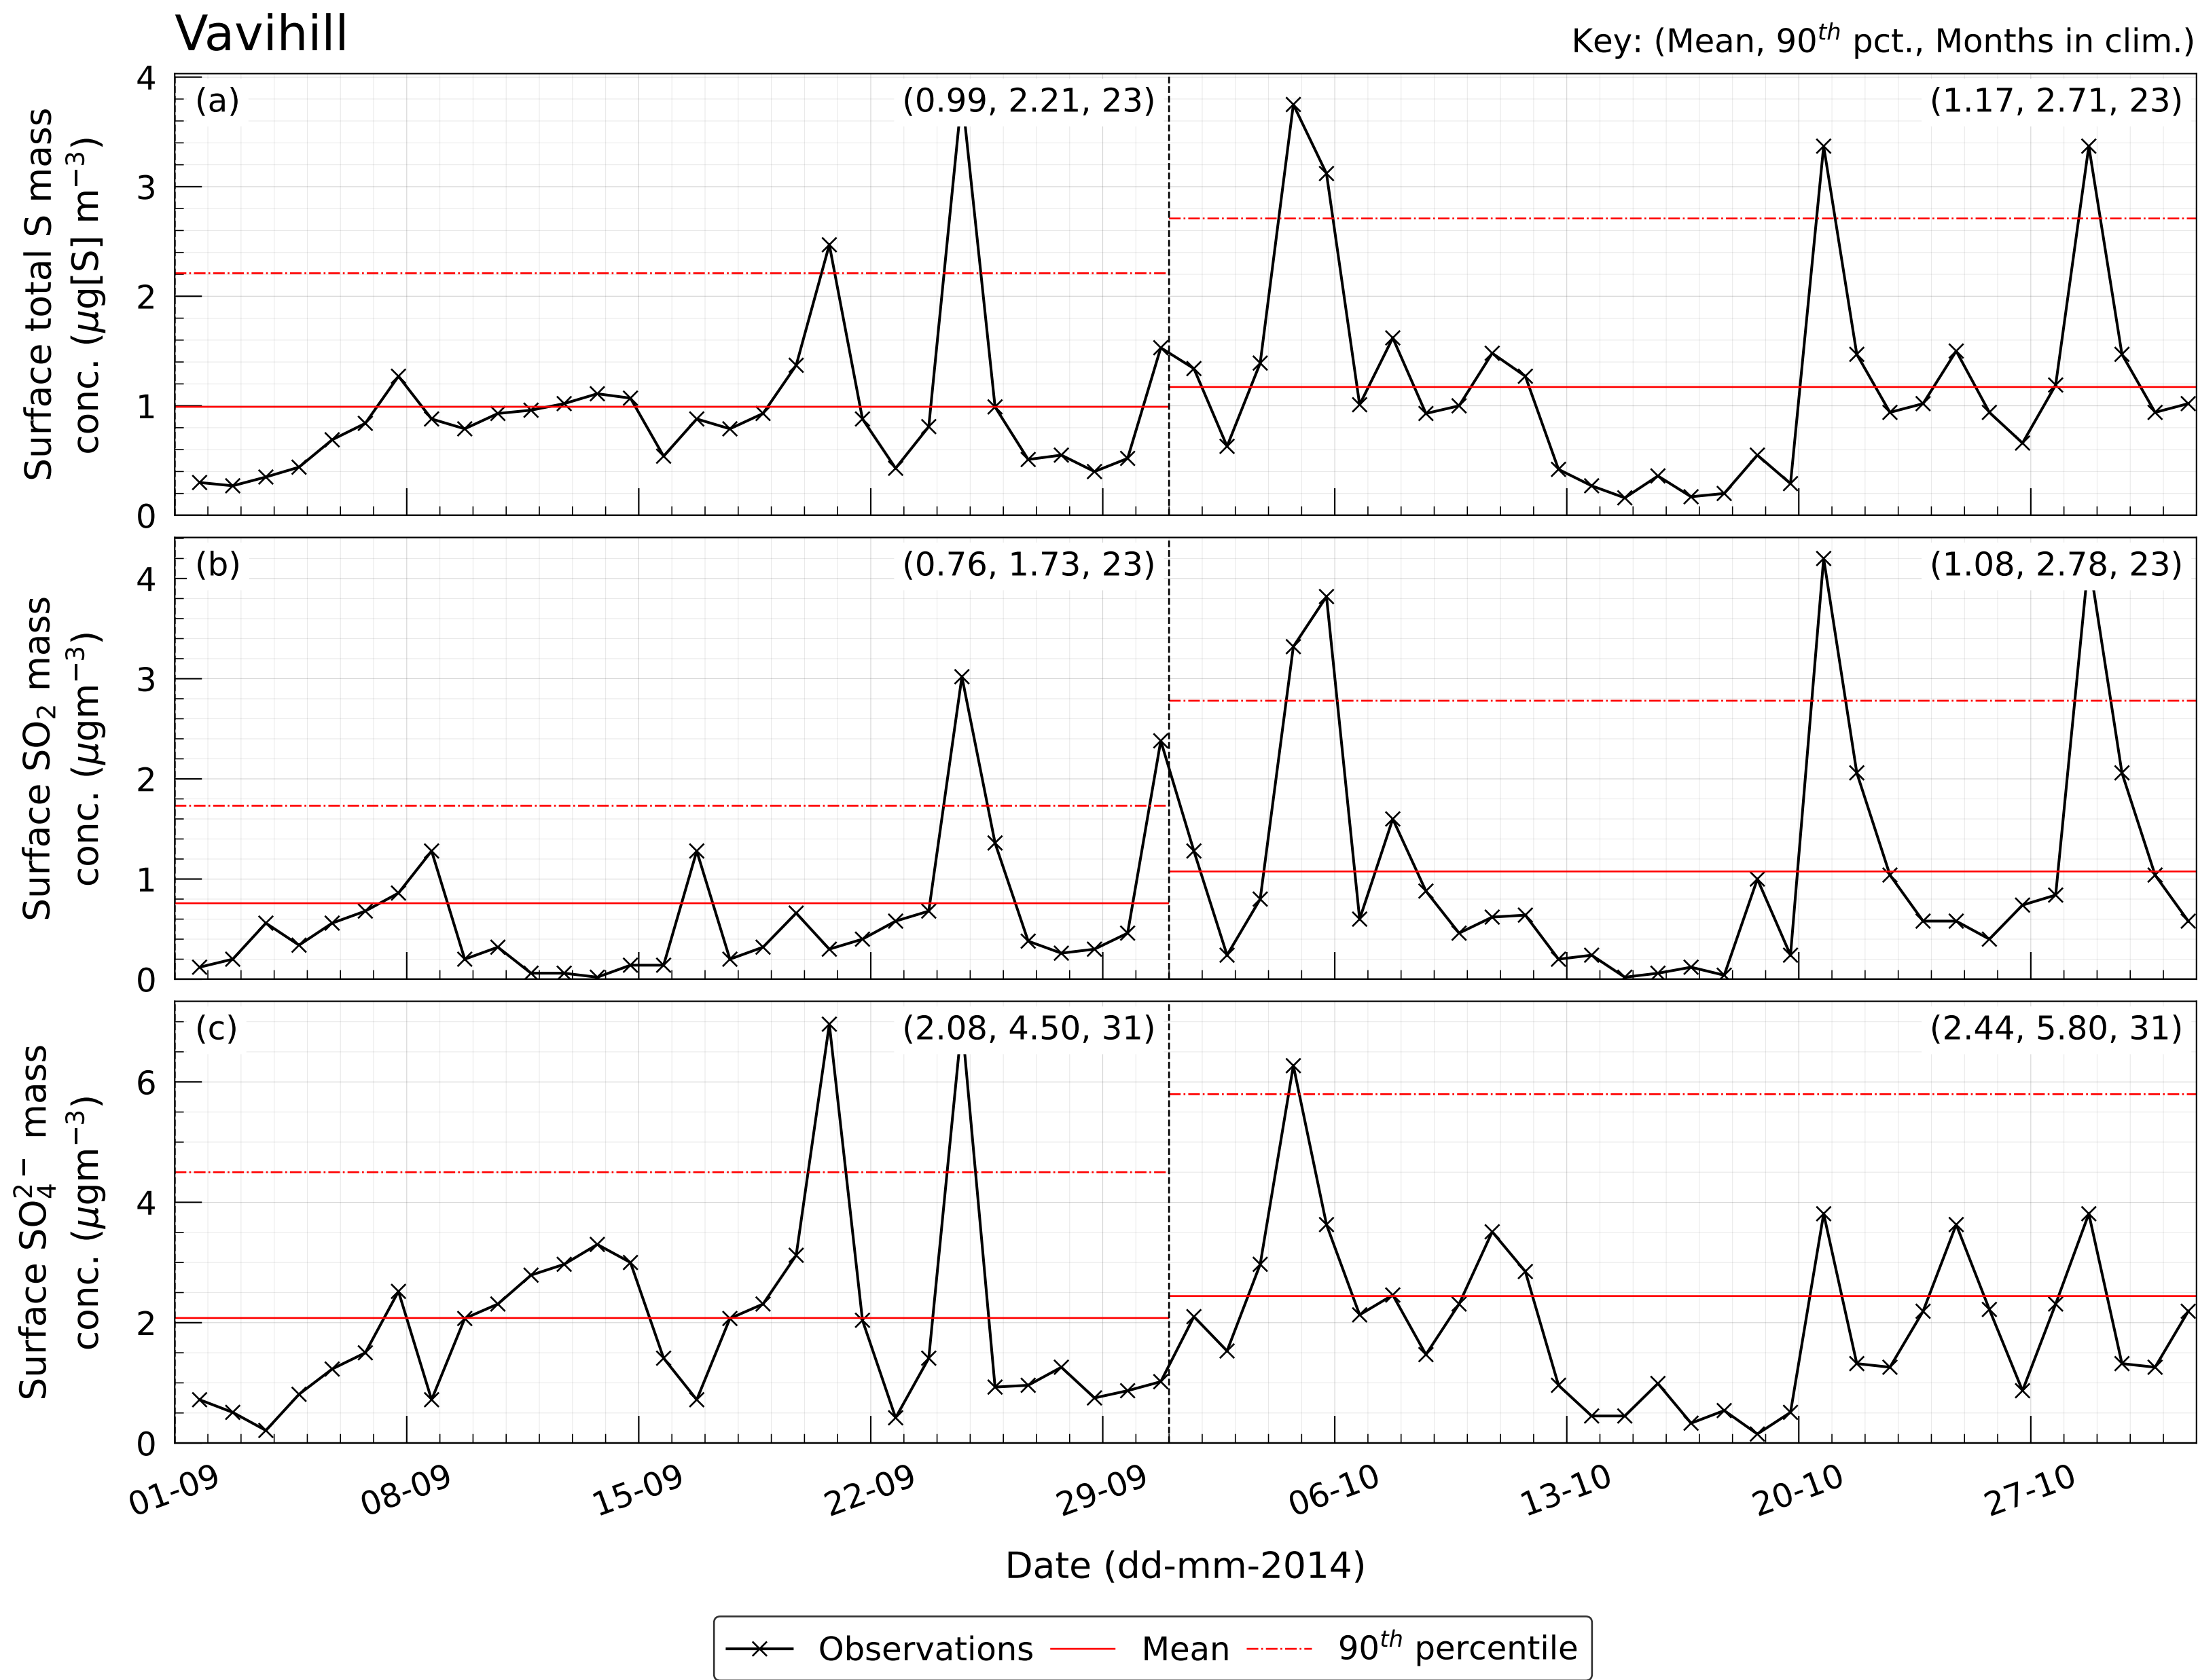

Supplement: Supplementary file 19 [file acp-24-1939-2024-supplement.zip]

# Rucava

Key: (Mean, 90<sup>th</sup> pct., Months in clim.)

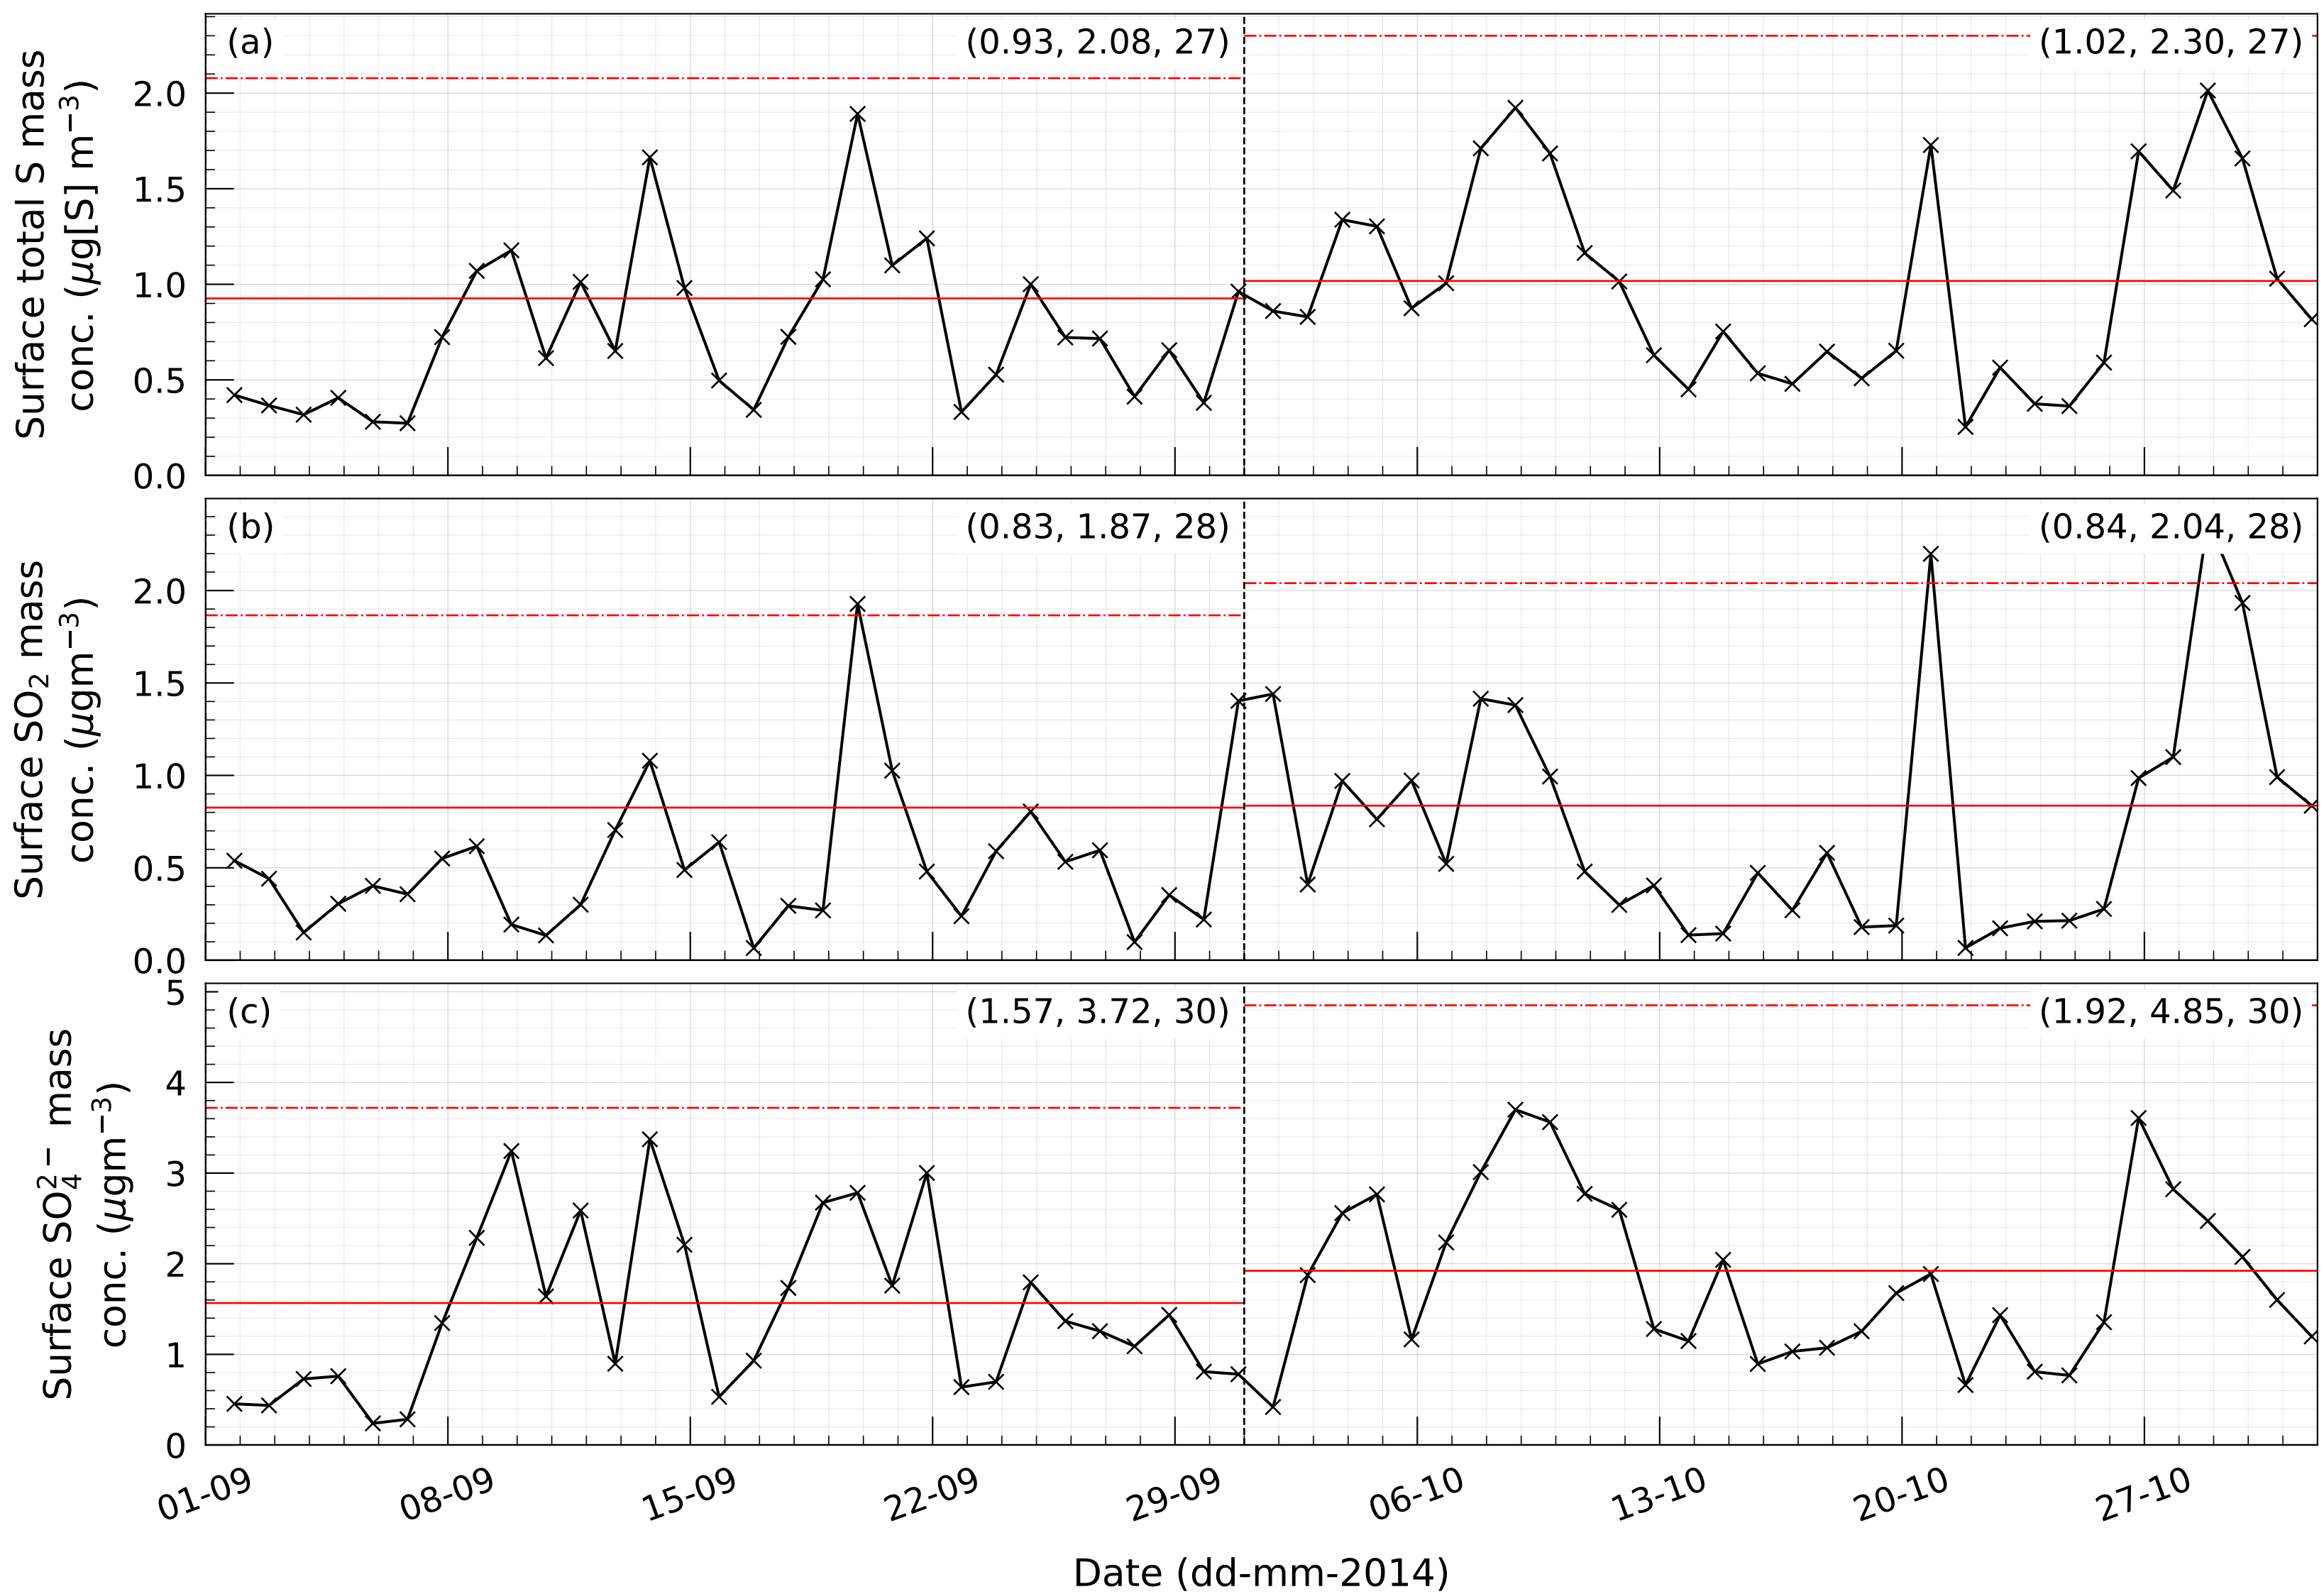

—x— Observations — Mean - - - 90<sup>th</sup> percentile

Supplement: Supplementary file 20 [file acp-24-1939-2024-supplement.zip]

Key: (Mean, 90<sup>th</sup> pct., Months in clim.)

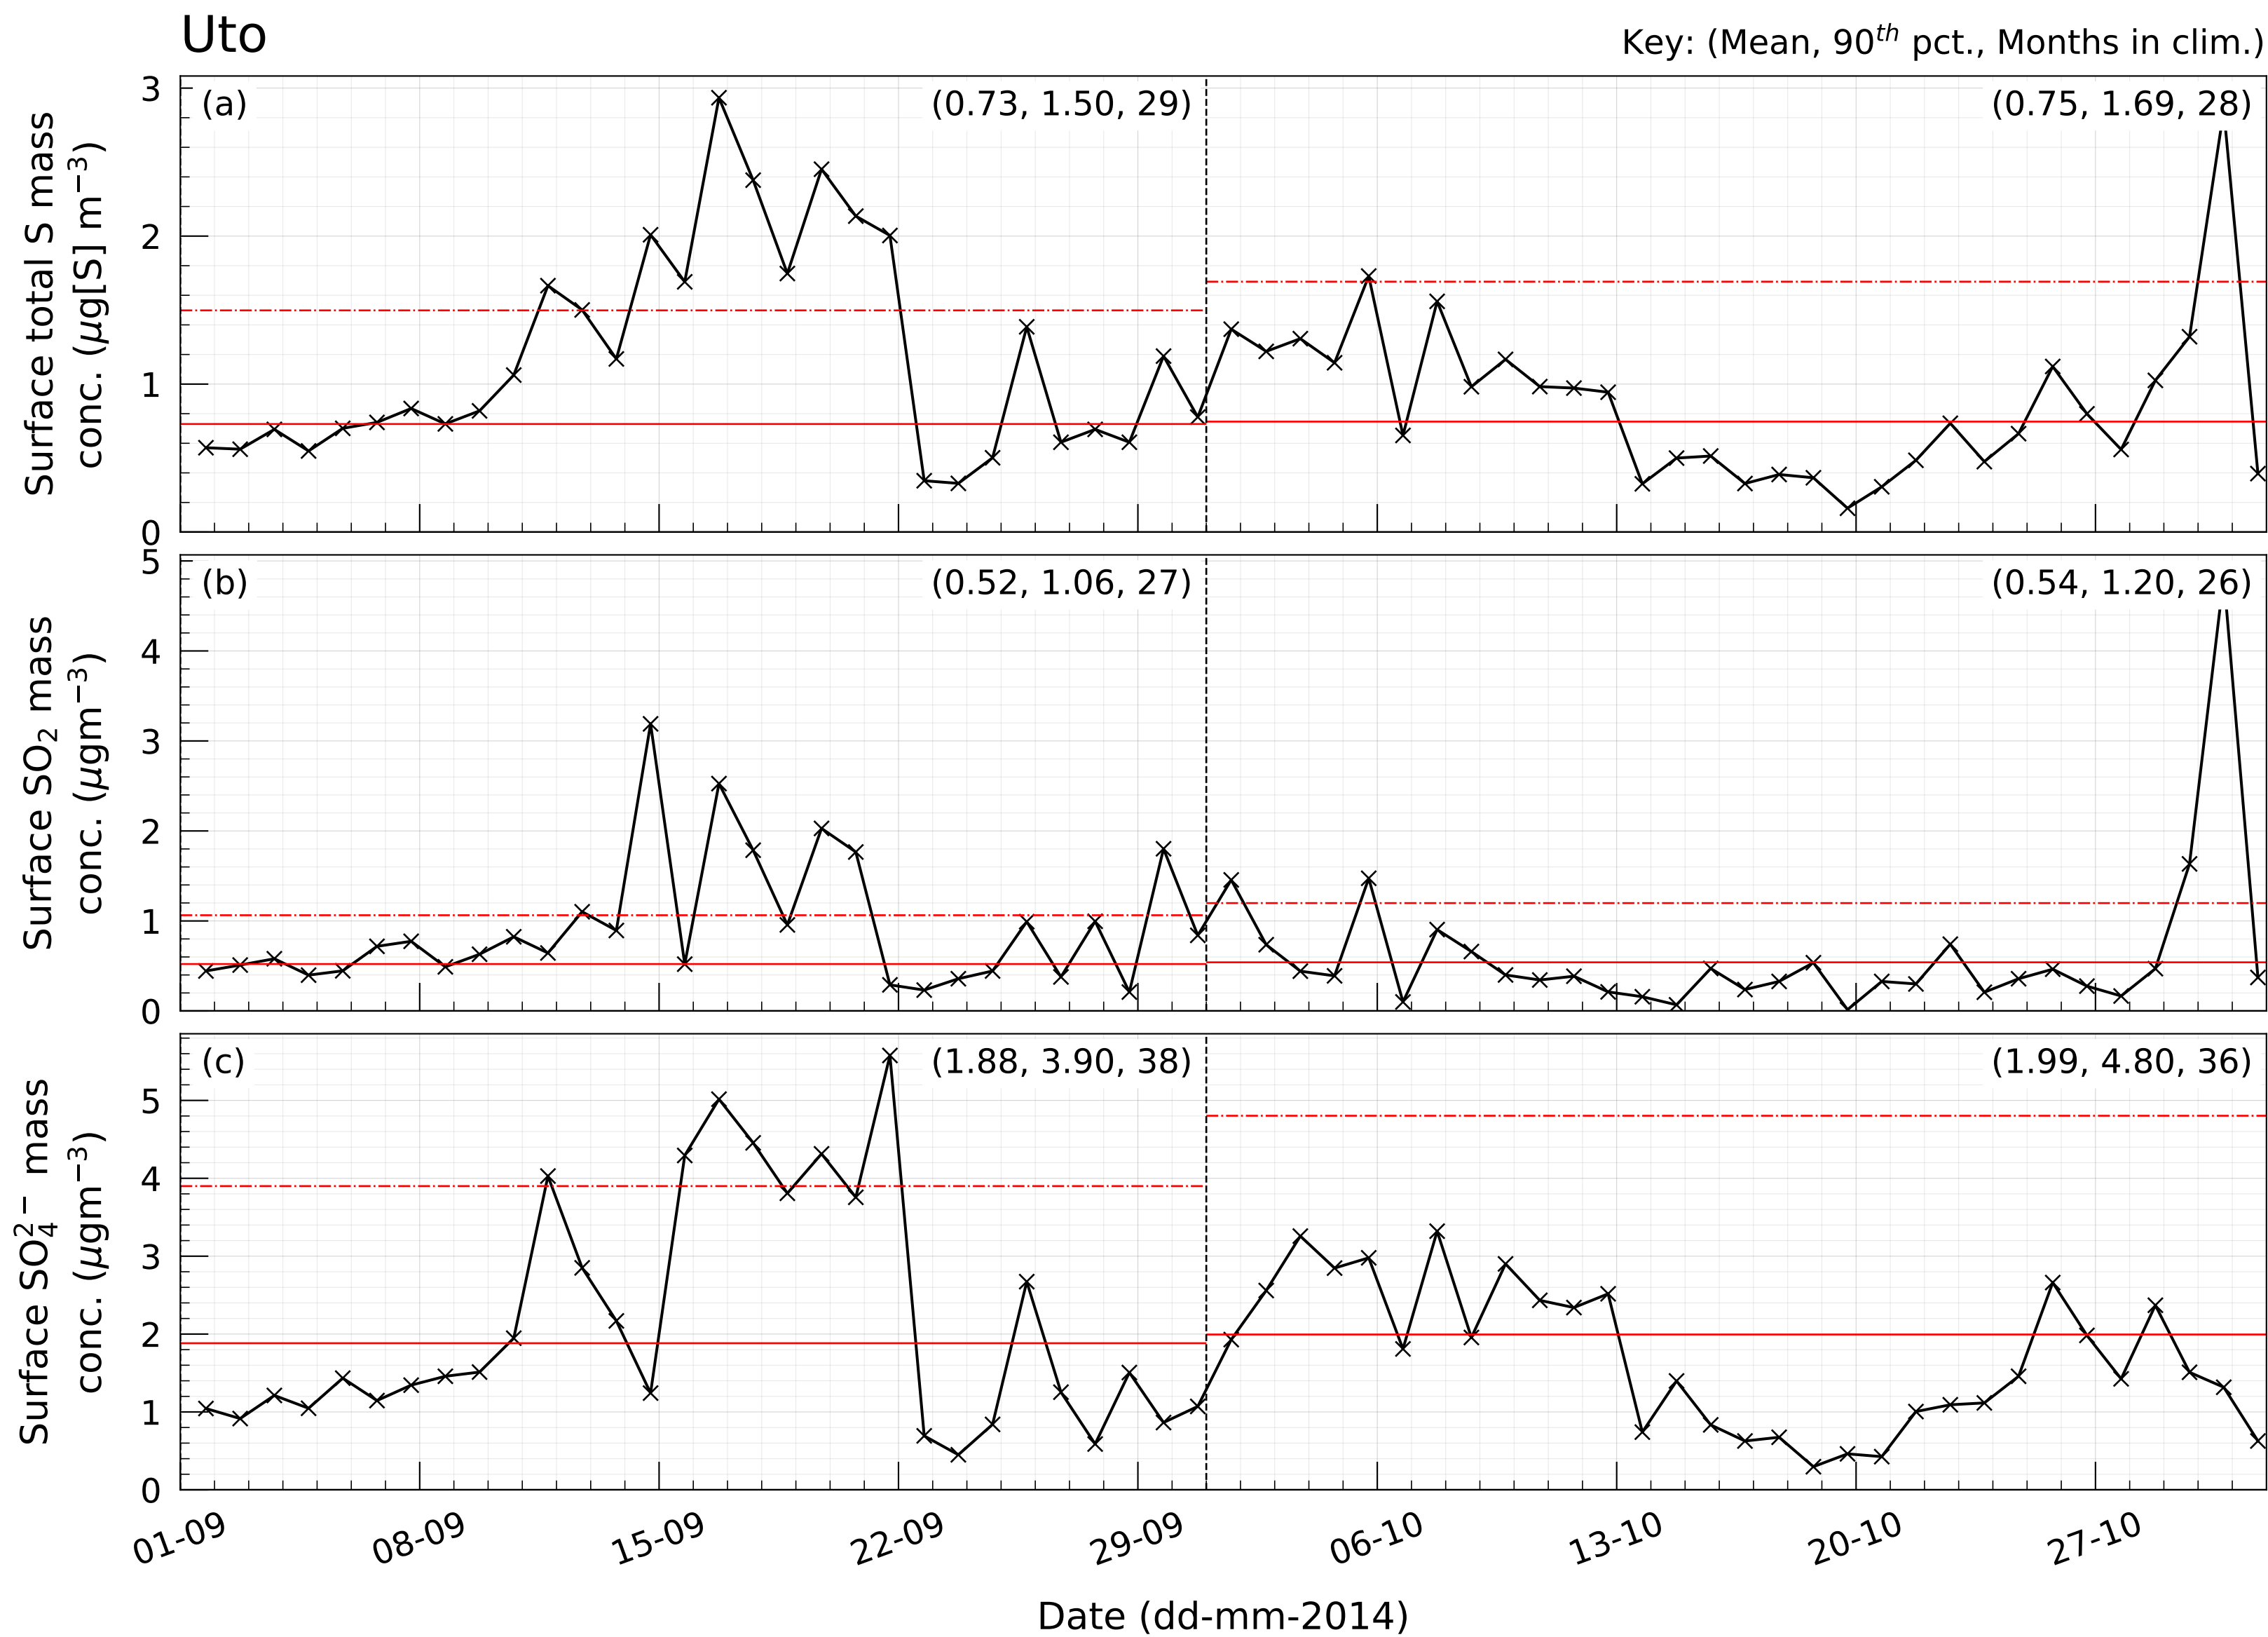

Supplement: Supplementary file 21 [file acp-24-1939-2024-supplement.zip]

$\text{SO}_2\text{-to-SO}_4^{2-}$  surface mass concentration ratio

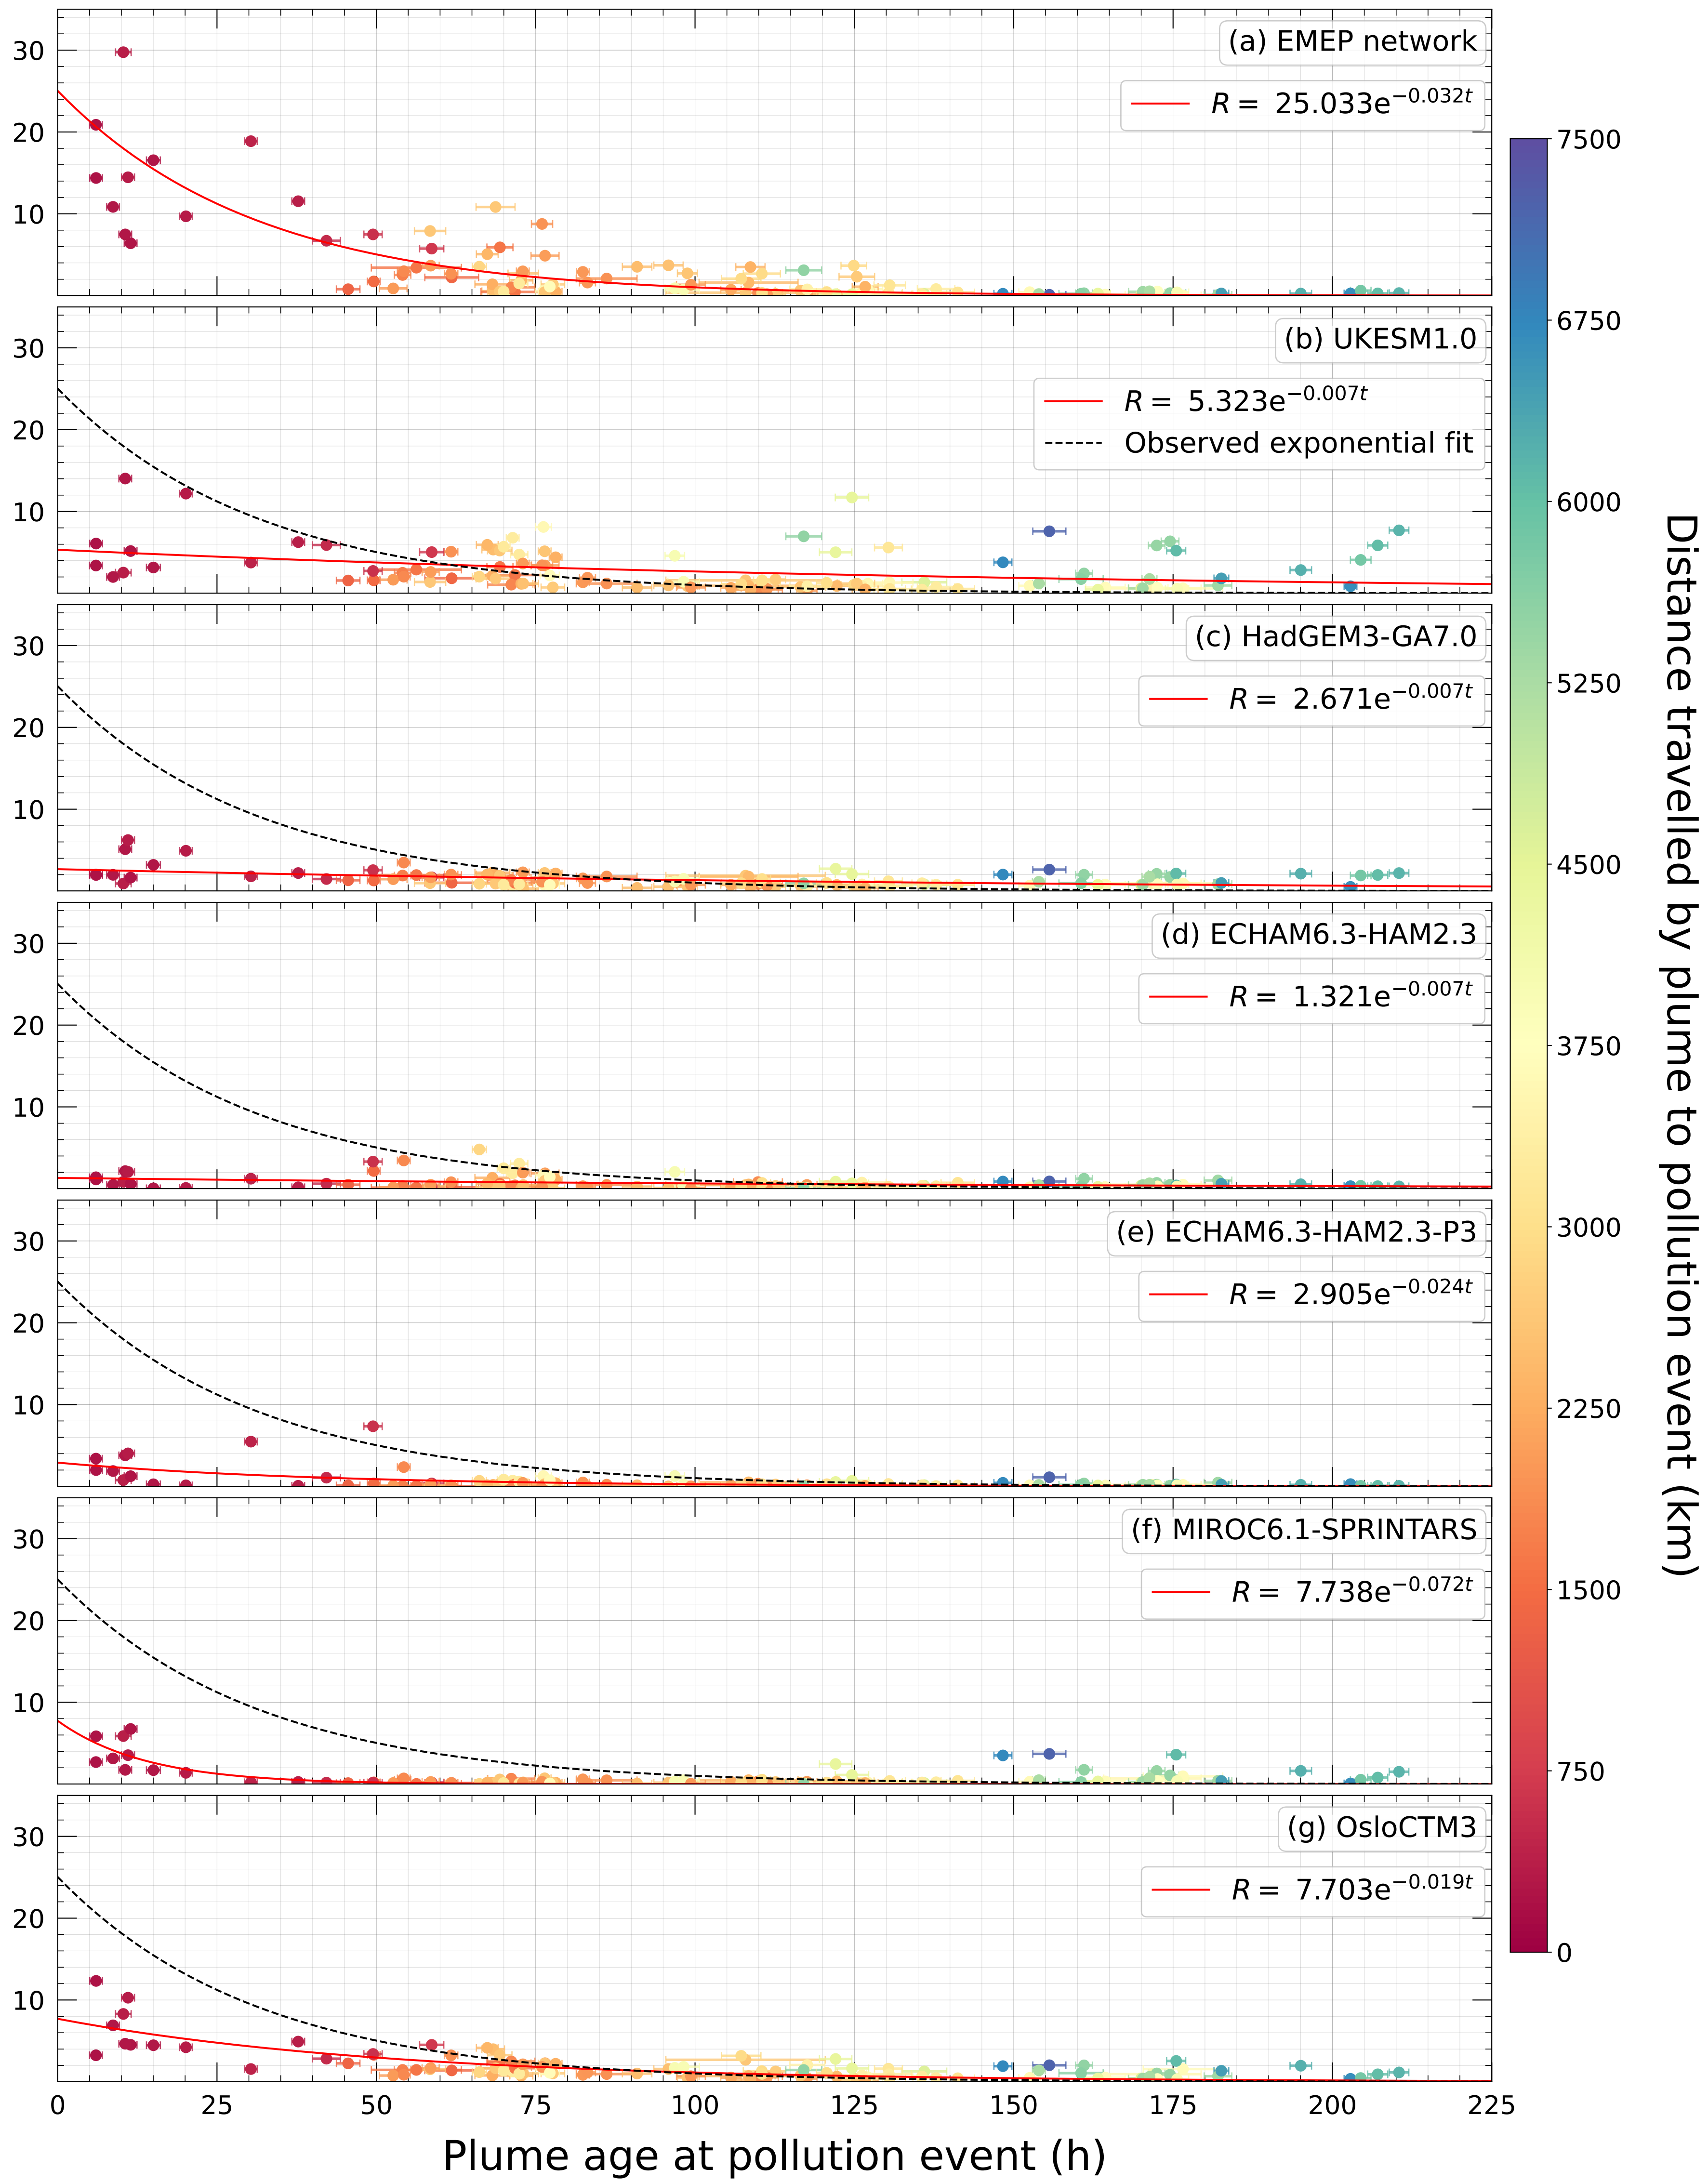

Supplement: Supplementary file 22 [file acp-24-1939-2024-supplement.zip]

Key: (Mean, 90<sup>th</sup> pct., Months in clim.)

Leba

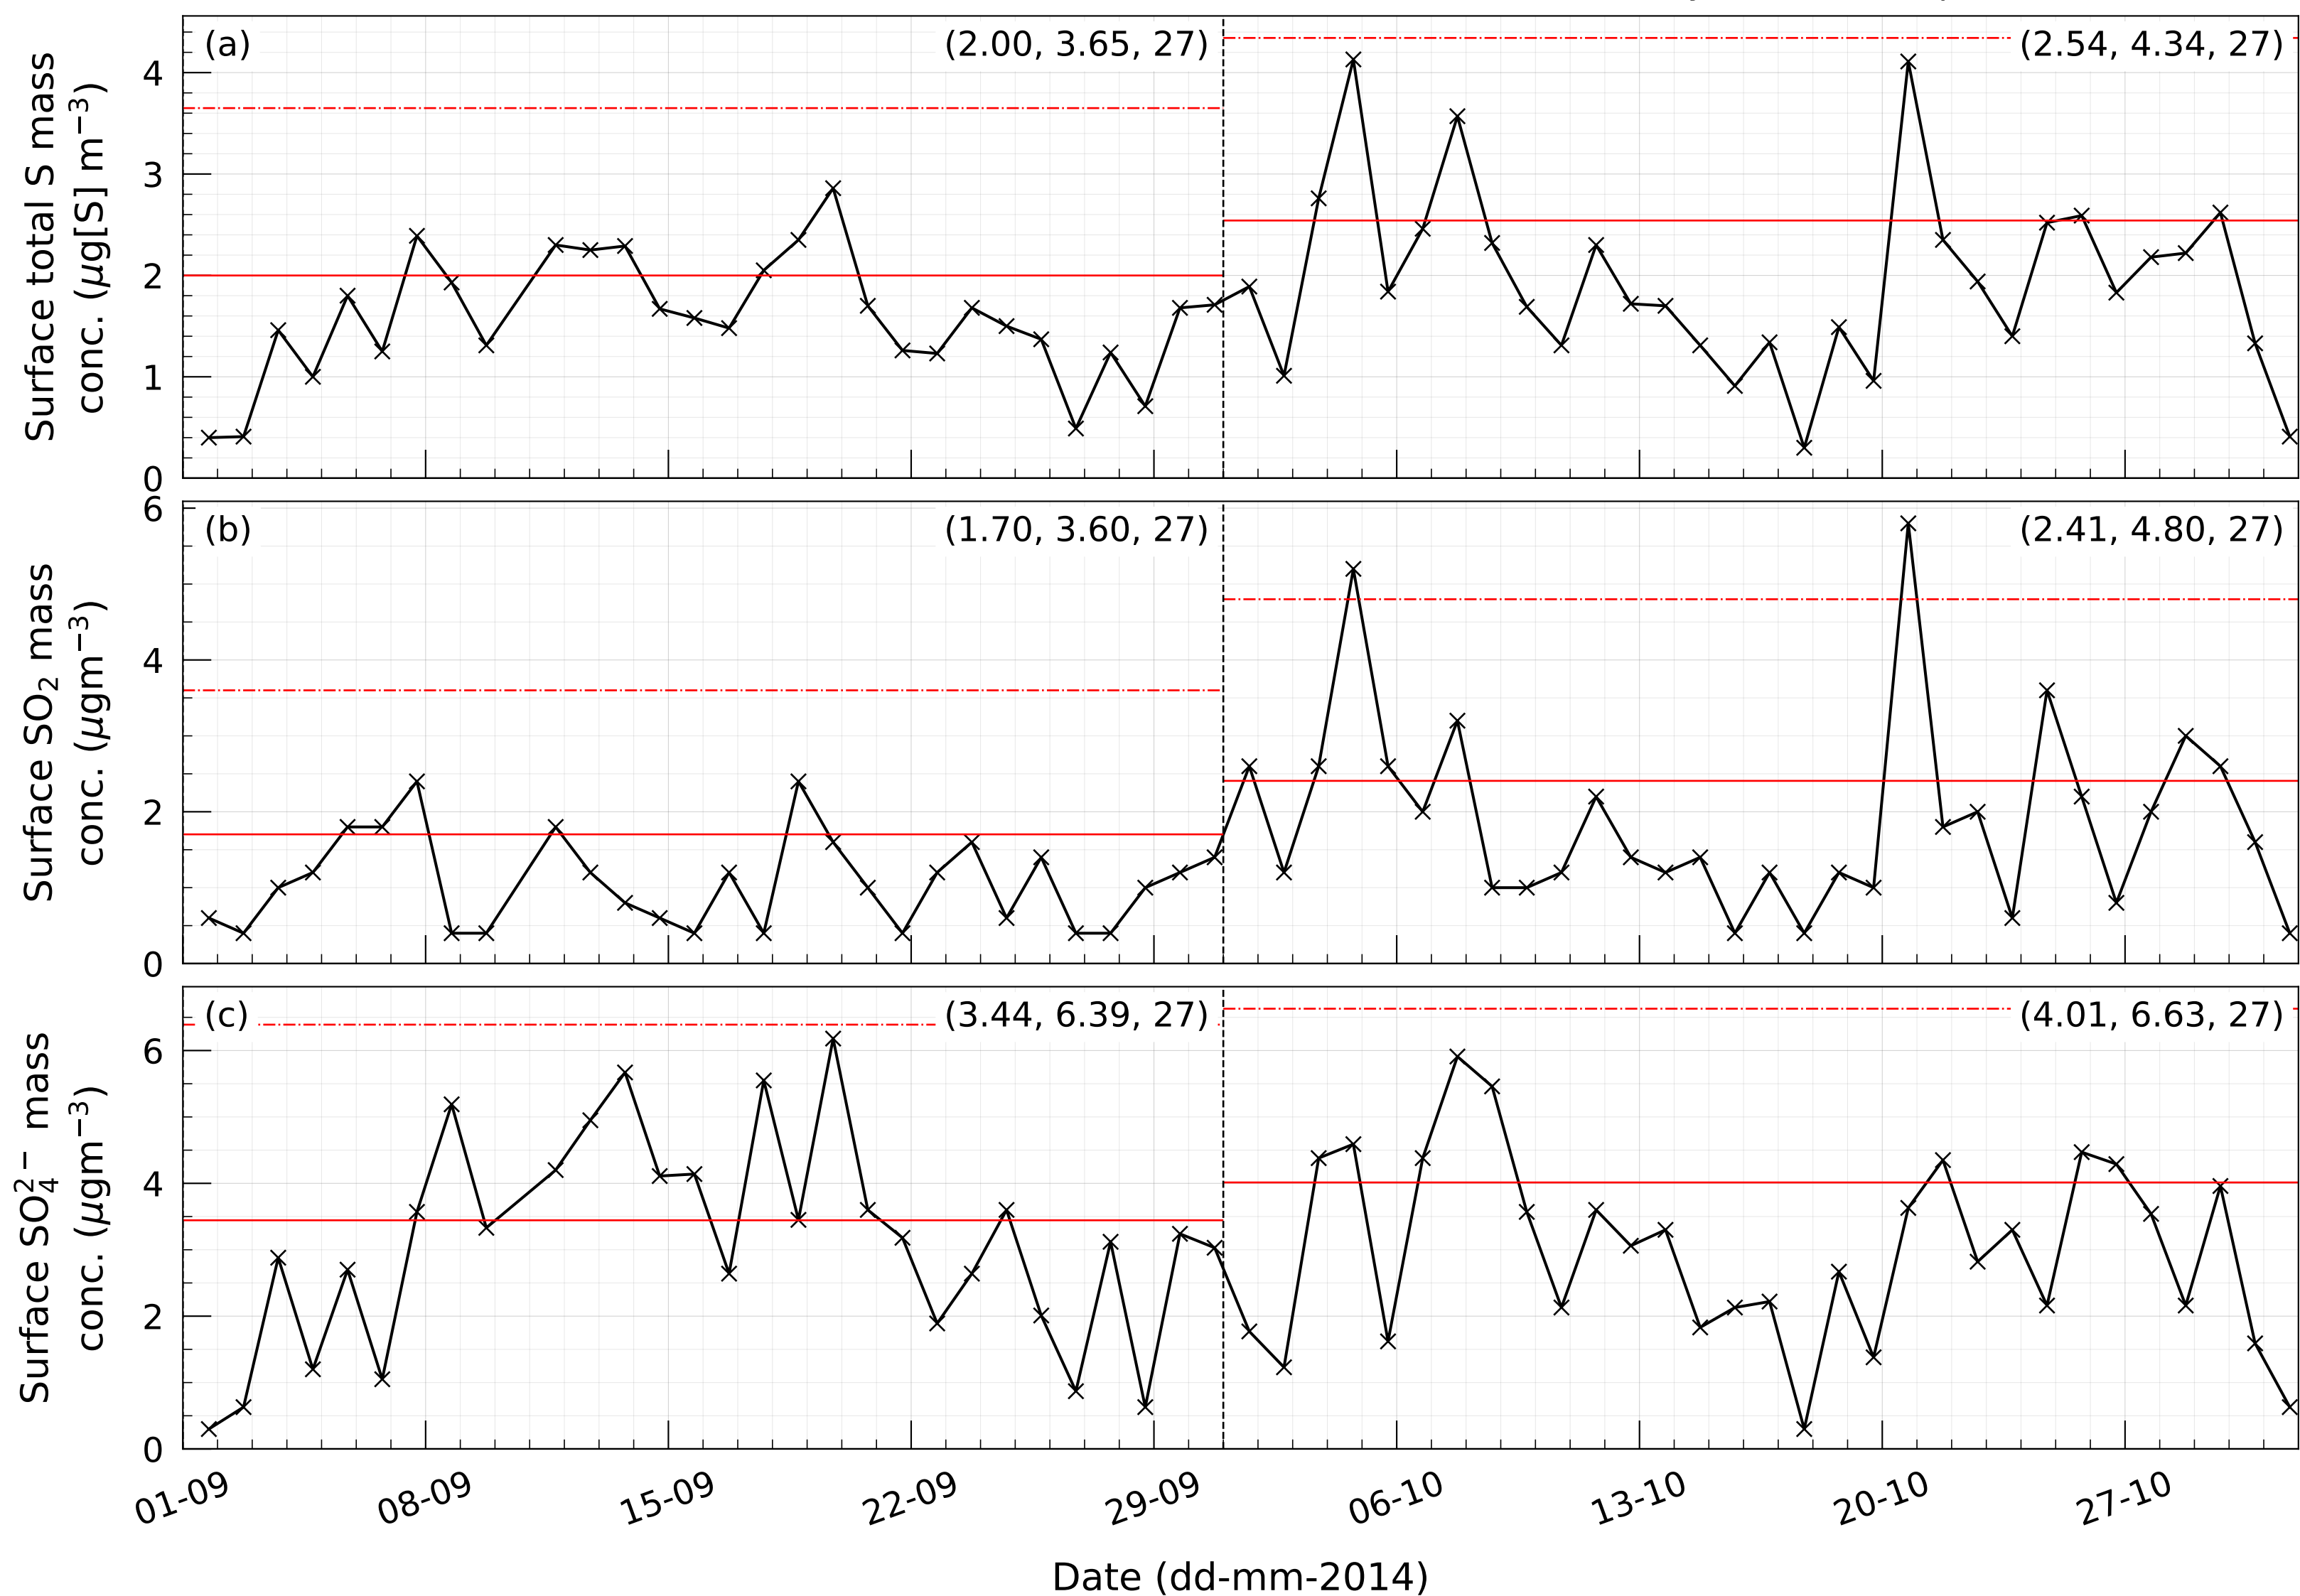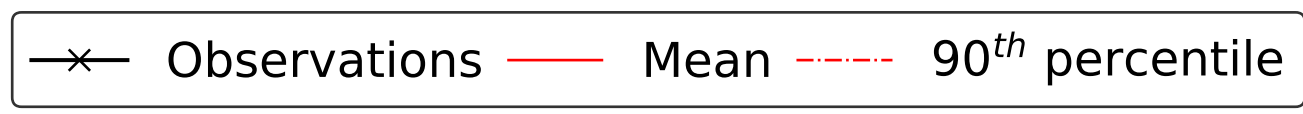

Supplement: Supplementary file 24 [file acp-24-1939-2024-supplement.zip]

# IrafoSS

Key: (Mean, 90<sup>th</sup> pct., Months in clim.)

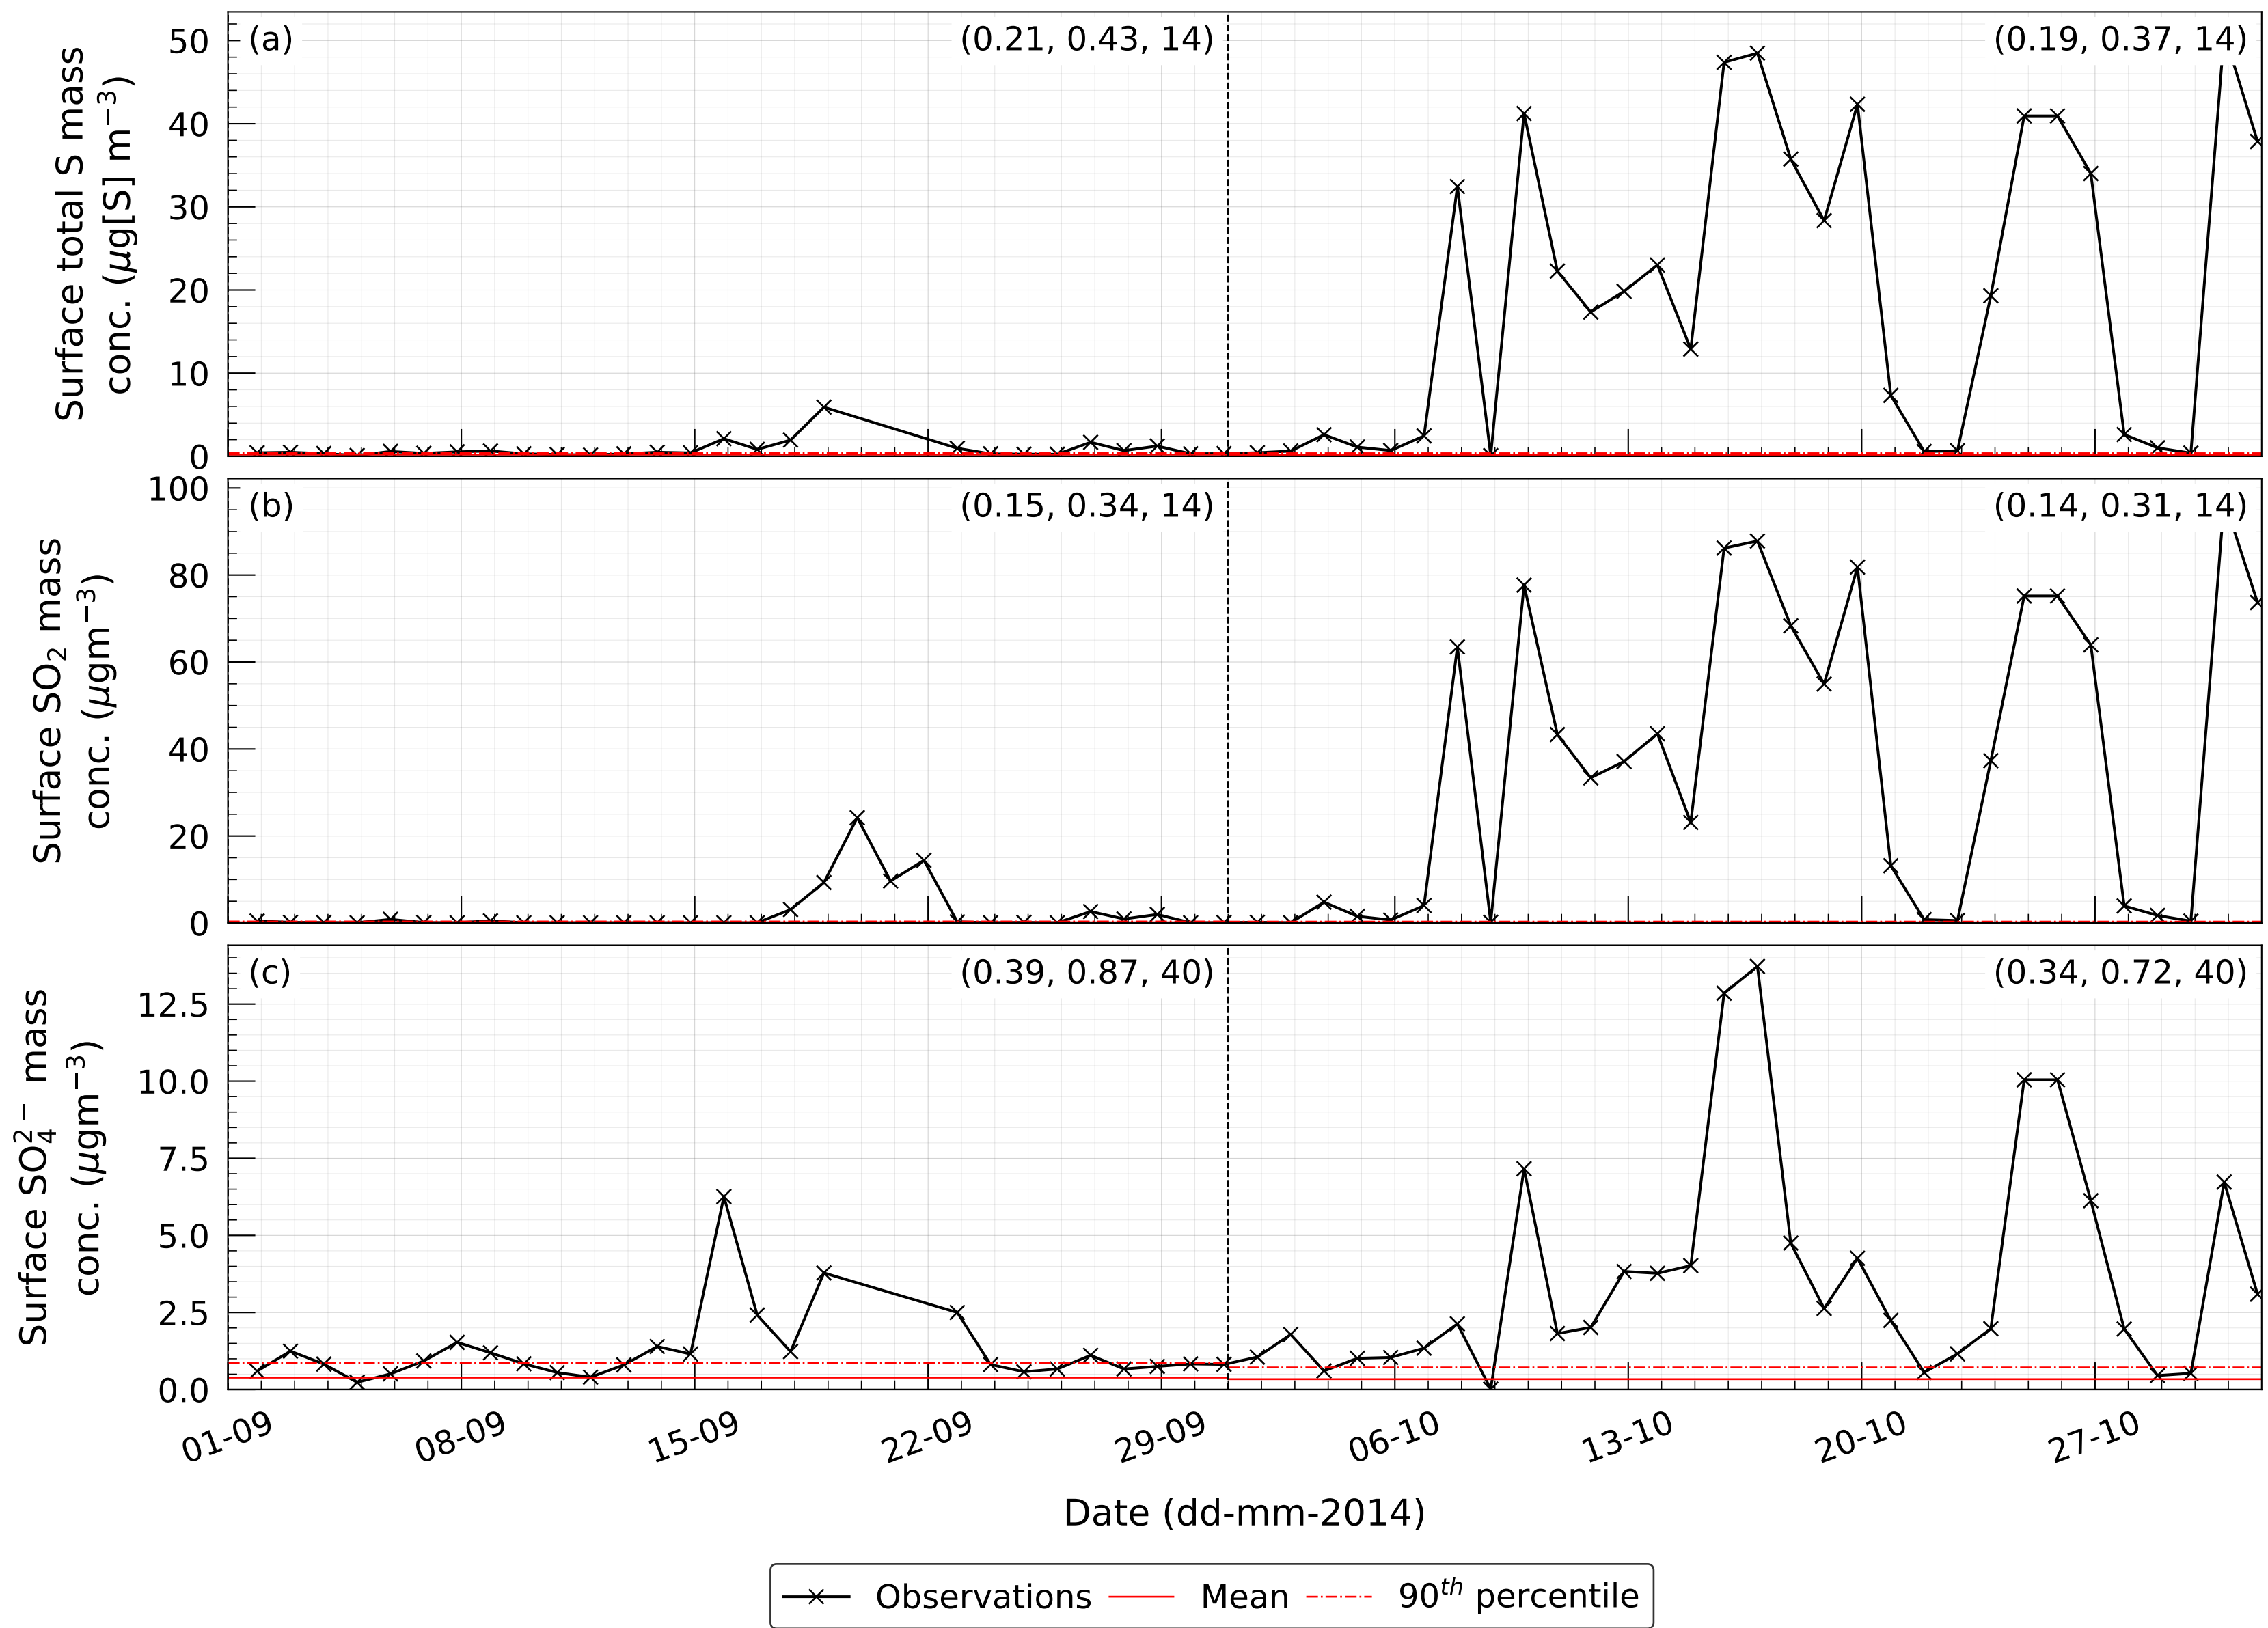

Supplement: Supplementary file 25 [file acp-24-1939-2024-supplement.zip]

Key: (Mean, 90<sup>th</sup> pct., Months in clim.)

# Virolahti-ii

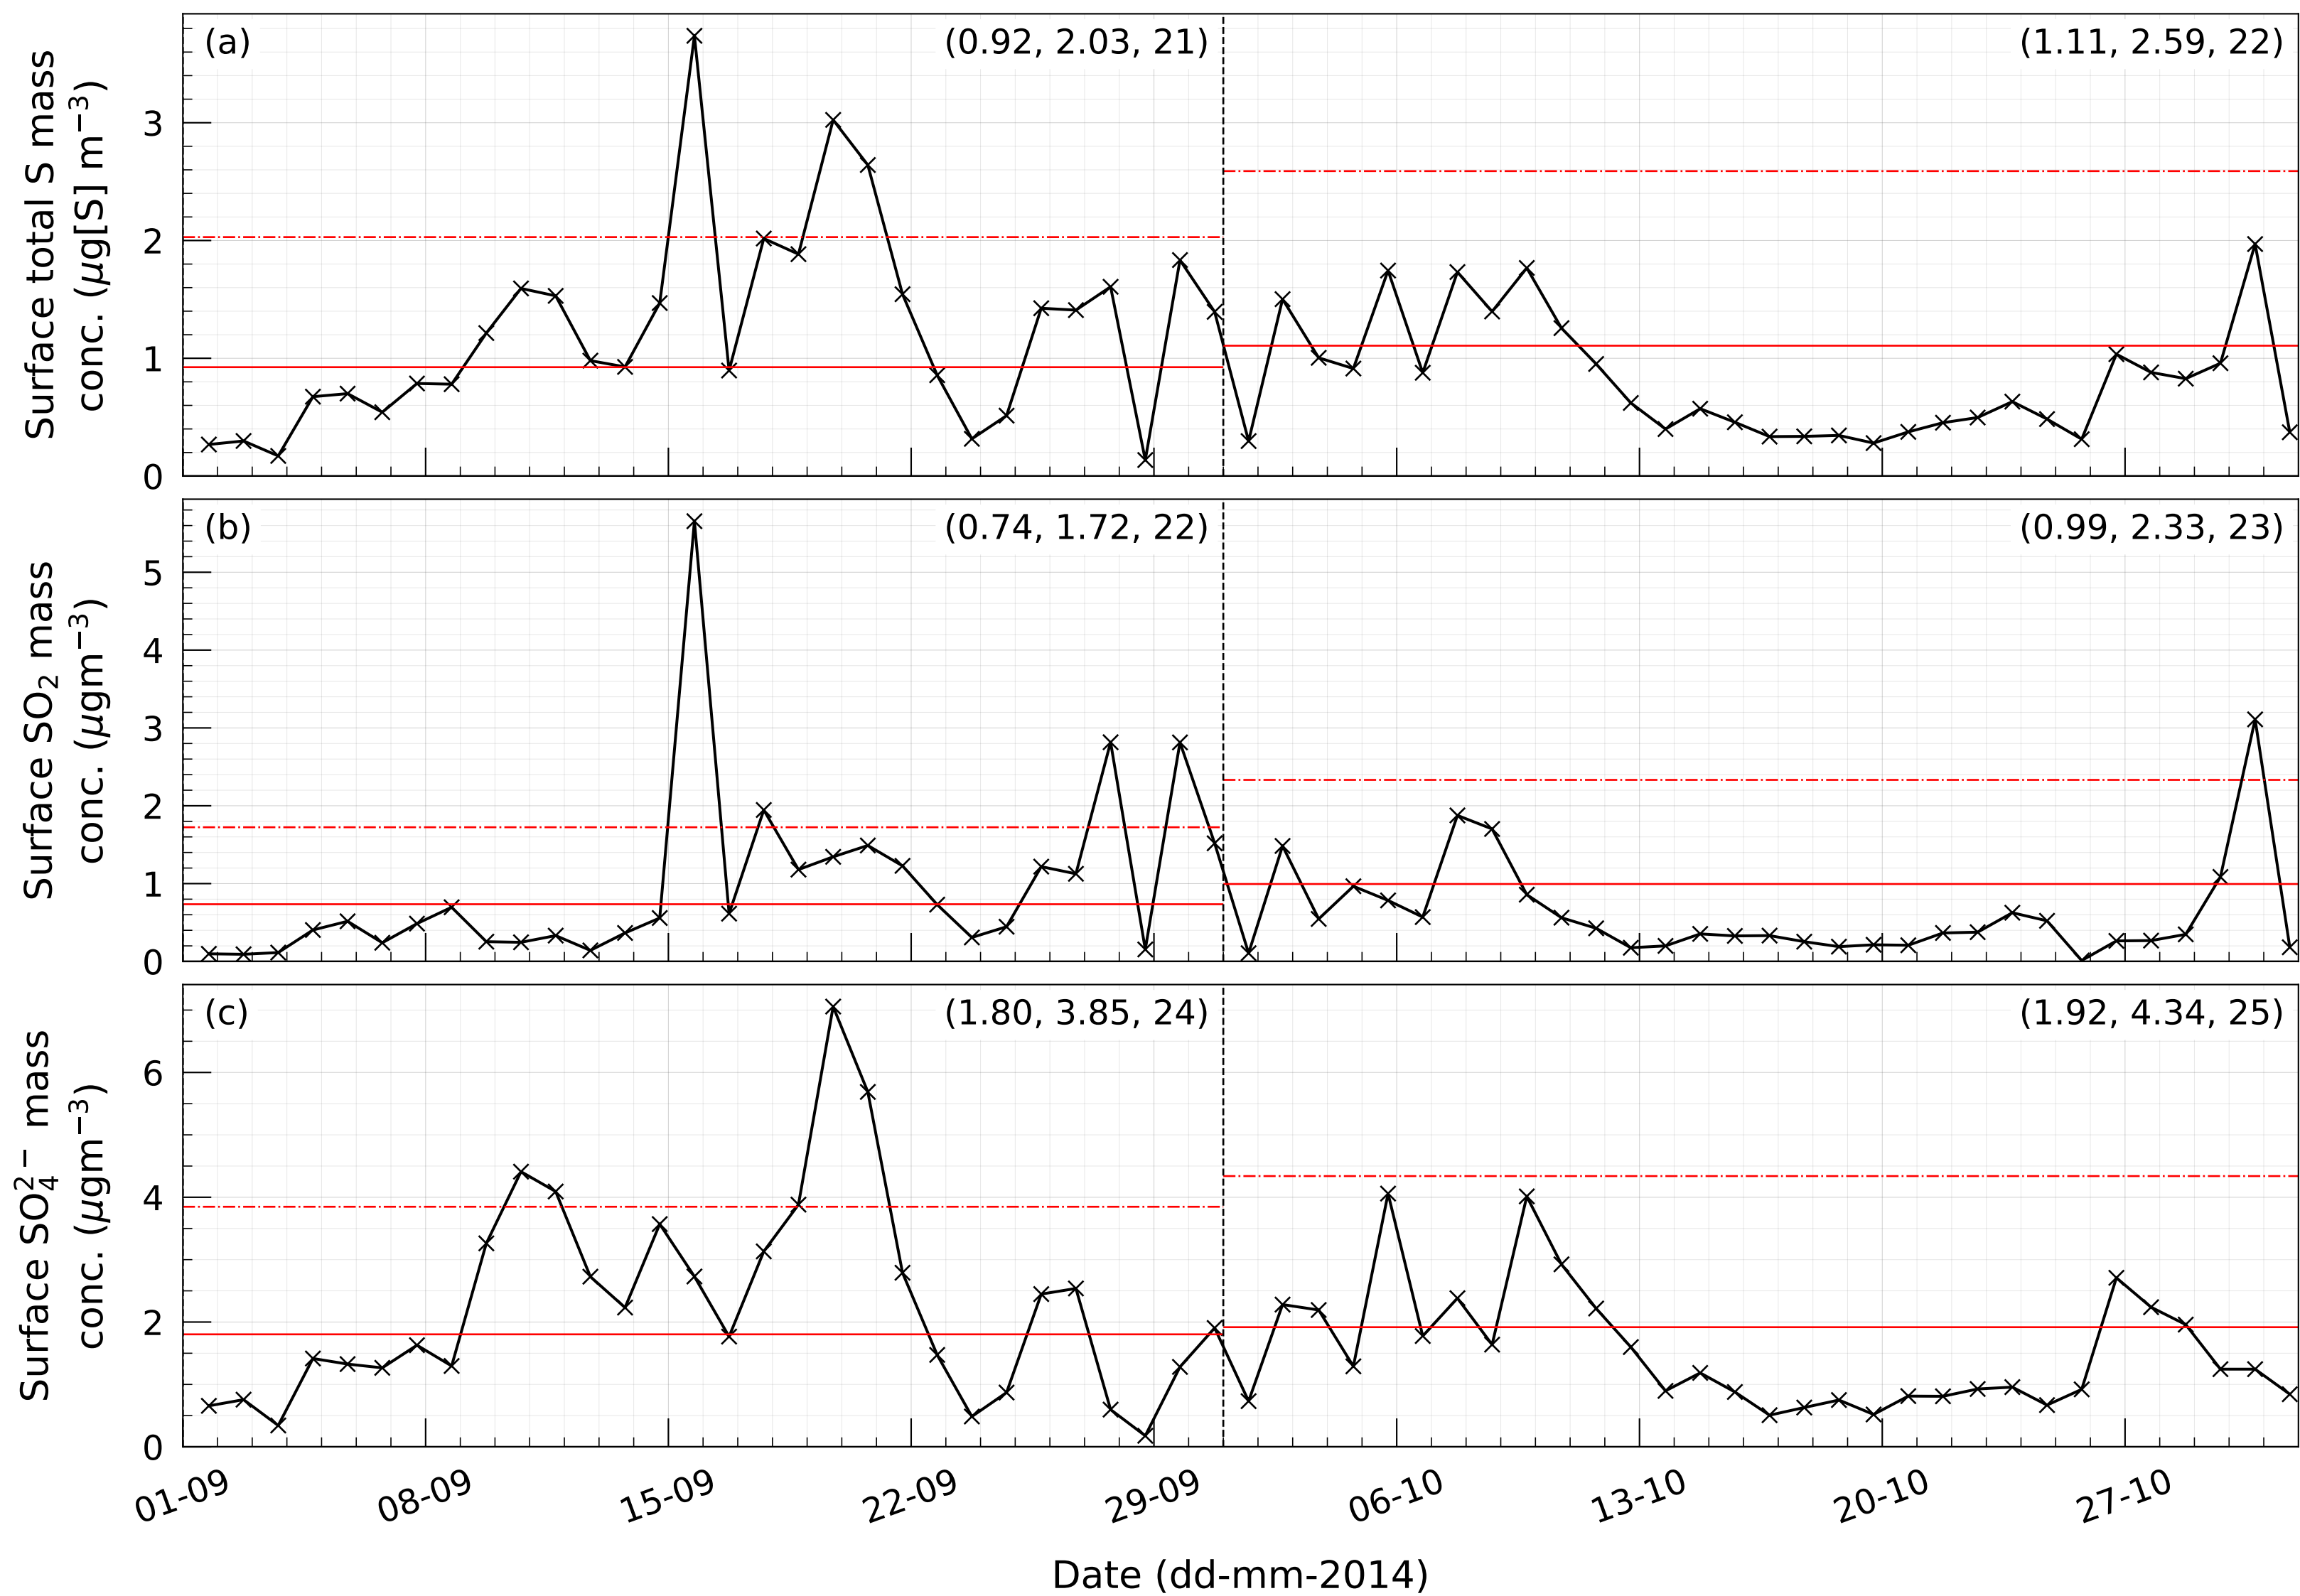

Supplement: Supplementary file 26 [file acp-24-1939-2024-supplement.zip]

Key: (Mean, 90<sup>th</sup> pct., Months in clim.)

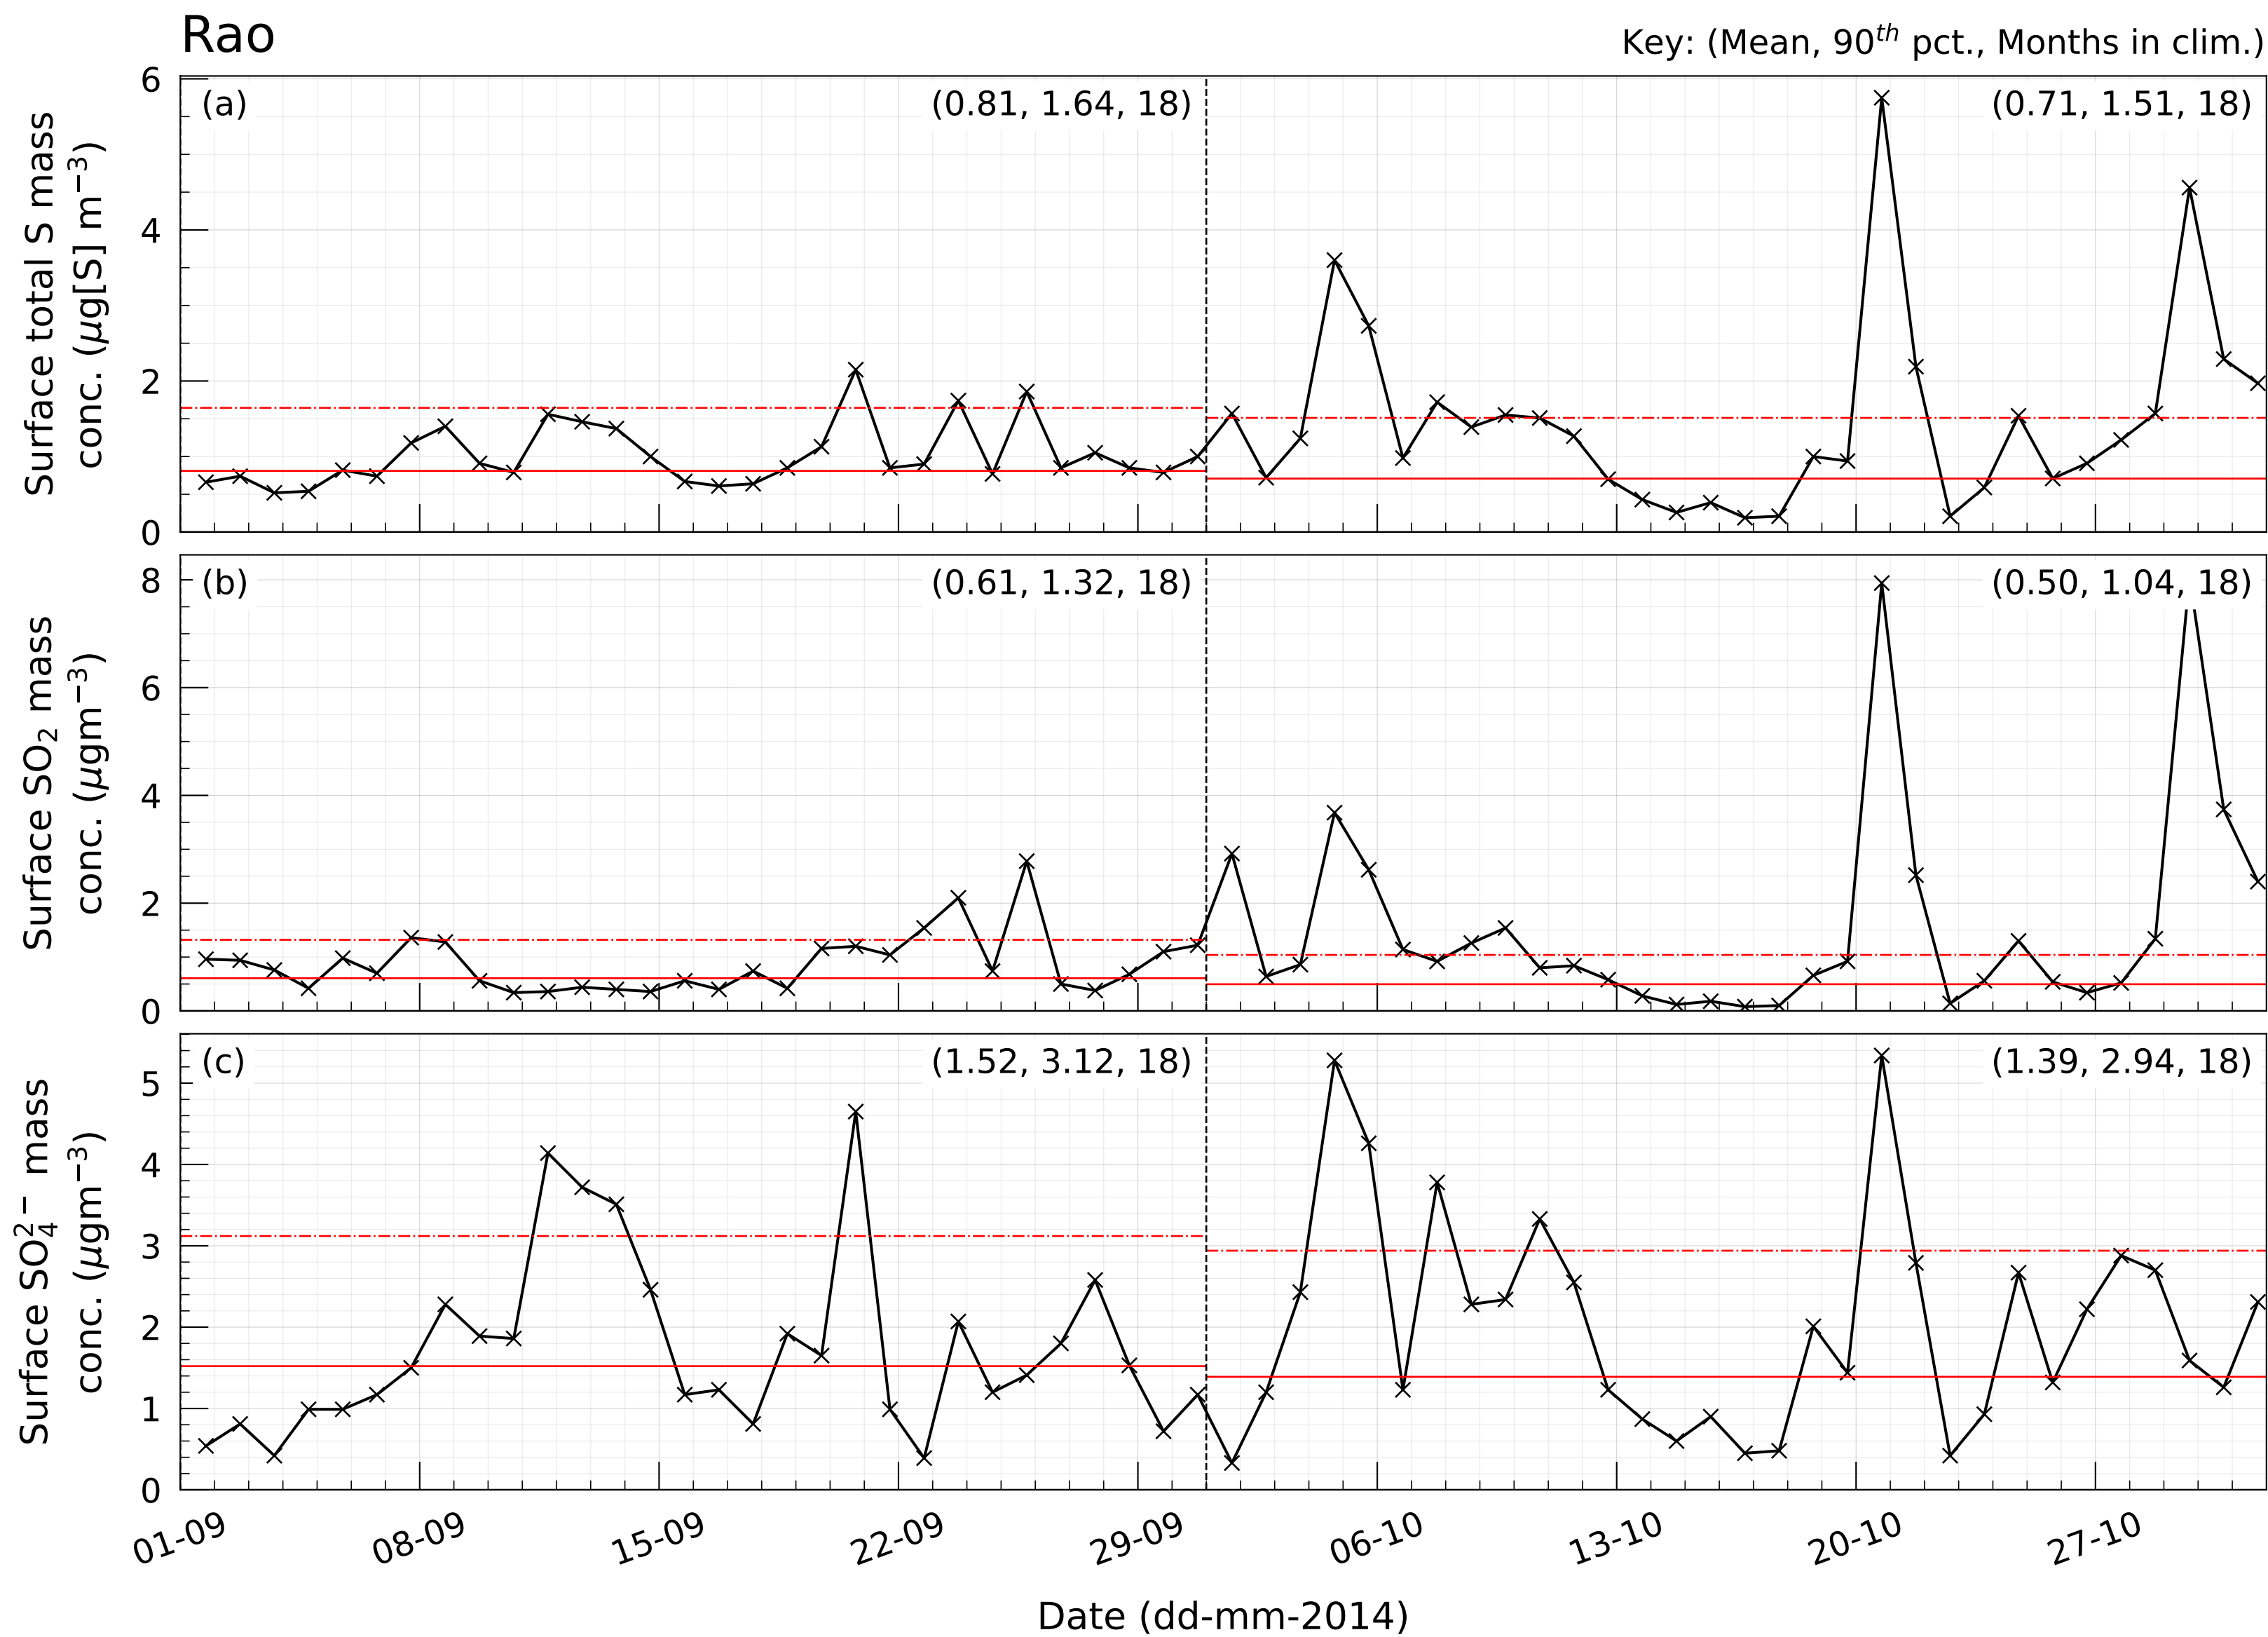

—x— Observations — Mean - - - 90<sup>th</sup> percentile

Supplement: Supplementary file 27 [file acp-24-1939-2024-supplement.zip]
